# Supplementary material
Source: PubMed Central journal article supplement (PMC3595042)

# Control of Diastereoselectivity for Iridium-catalyzed Allylation of a Prochiral Nucleophile with a Phosphate Counterion

Wenyong Chen and John F. Hartwig\*

*Department of Chemistry, University of California, Berkeley, California, 94720, United States*

## Supporting Information

### Table of Contents

|                                                                                       |      |
|---------------------------------------------------------------------------------------|------|
| General Experimental Details                                                          | S-1  |
| General Procedure for Evaluation of Reaction Conditions                               | S-2  |
| Procedure for the Synthesis of DBCOT                                                  | S-3  |
| Procedure for the Synthesis of <b>2c</b>                                              | S-3  |
| General Procedure for Ir-Catalyzed Allylation of Azlactones                           | S-4  |
| Procedure for the Synthesis of <b>6e</b>                                              | S-19 |
| References                                                                            | S-22 |
| <sup>1</sup> H, <sup>13</sup> C and <sup>31</sup> P NMR Spectra for All New Compounds | S-23 |

### General Experimental Details

All air-sensitive manipulations were conducted under an inert atmosphere in a nitrogen-filled glovebox or by standard Schlenk techniques. DCM, toluene, THF were degassed by purging with argon for 15 minutes and dried with a solvent purification system containing a one-meter column of activated alumina. Cinnamyl alcohol, 4-nitrocinnamyl alcohol, 4-methoxybenzaldehyde, 4-fluorobenzaldehyde, 3-fluorobenzaldehyde and 4-chlorobenzaldehyde were purchased from Sigma-Aldrich and used without further purification. Vinylmagnesium chloride was purchased as a 1.6 M solution in THF from Sigma-Aldrich. Azlactones were prepared according to literature procedures.<sup>1</sup> All the allylic carbonates and phosphates were prepared according to literature procedures.<sup>2</sup> The racemic samples were prepared by using racemic catalyst.

[Ir(cod)Cl]<sub>2</sub> was obtained from Johnson-Matthey and used without further purification. Phosphoramidite ligands **1** were synthesized according to literature procedures.<sup>3</sup> [Ir(COD)(κ<sup>2</sup>-**1**)(ethylene) (**1**)] was prepared according to literature procedures.<sup>4</sup> GC analyses were obtained on an Agilent 6890 GC equipped with an HP-5 column (25 m x 0.20 mm ID x 0.33 m film) and an FID detector. HPLC analyses were carried out on a Waters chromatography system (1525 binary pump, 717+ autosampler, 2487 dual wavelength detector) with using chiral stationary columns (0.46 cm x 25 cm) from Daicel. Optical rotations were measured on a Perkin Elmer 241 Automatic Polarimeter. High resolution mass spectra and elemental analyses were obtained via the Micro-Mass/Analytical Facility operated by the College of Chemistry, University of

California, Berkeley. NMR spectra were acquired on Bruker AVQ-400, AVB-400, DRX 500, and AV-600 spectrometers. Chemical shifts were reported in ppm relative to a residual solvent peak ( $\text{CDCl}_3 = 7.26$  ppm for  $^1\text{H}$  and 77.00 ppm for  $^{13}\text{C}$ ). Coupling constants were reported in hertz. Flash column chromatography was performed on Silicylce Silica-P silica gel. Products were visualized on TLC plates by UV or by staining with  $\text{KMnO}_4$ .

### General Procedure for Evaluation of Reaction Conditions

In a nitrogen-filled dry-box, the cinnamyl carbonate (0.250 mmol, 1.00 equiv),  $[\text{Ir}(\text{cod})\text{Cl}]_2$  (0.0050 mmol, 0.0200 equiv), ligand **1** (0.0100 mmol, 0.0400 equiv), AgX (0.0200 mmol, 0.0800 equiv) and toluene (0.25 mL) were added to a 1-dram vial. The mixture was stirred for 20 min before azlactone **3** (0.550 mmol, 2.20 equiv) and 3 Å MS (50 mg) were added. The vial was sealed with a PTFE/silicone-lined septum cap, removed from the dry-box, and stirred at room temperature for 8 h. The reaction progress was monitored by TLC. When the reaction was judged to be complete, the solution was filtered through a 0.5 inch plug of silica gel (eluting with EtOAc) to remove the solid. The crude reaction mixture was concentrated under reduced pressure.  $\text{CDCl}_3$  (0.7-0.8 mL) was added to dissolve the crude reaction mixture, and mesitylene (23  $\mu\text{L}$ ) was added as an internal standard. The diastereoselectivity was then determined by  $^1\text{H}$  NMR spectroscopy. After this analysis, the crude reaction mixture was purified by flash column silica gel chromatography (eluting with hexanes:EtOAc, 10:1 to 6:1) to yield the product.

**Table 1.** Evaluation of Ligand, Leaving Group, Solvent and Counterion Effect on the Ir-Catalyzed Allylation of azlactone **3**<sup>a</sup>

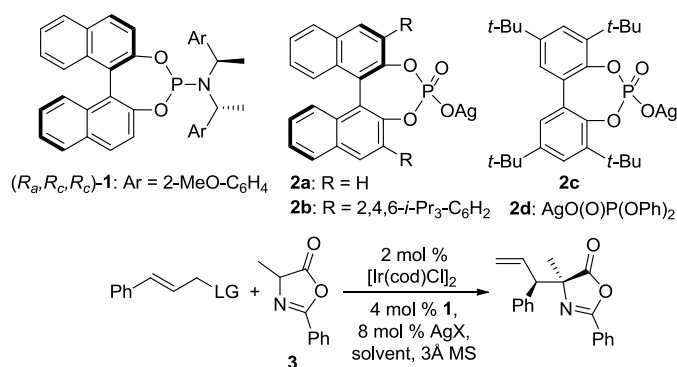

| Entry          | ligand        | LG     | Solvent | AgX               | Yield(%) <sup>b</sup> | dr <sup>c</sup> | ee(%) <sup>d</sup> |
|----------------|---------------|--------|---------|-------------------|-----------------------|-----------------|--------------------|
| 1 <sup>e</sup> | <b>1</b>      | OCOOMe | toluene | AgBF <sub>4</sub> | 31                    | 7:1             | 98                 |
| 2              | <b>1</b>      | OCOOMe | toluene | <b>2a</b>         | 83                    | 8:1             | 98                 |
| 3              | <b>1</b>      | OCOOMe | toluene | <b>2b</b>         | 87                    | >20:1           | 98                 |
| 4 <sup>f</sup> | <b>1</b>      | OCOOMe | toluene | <b>2b</b>         | 57                    | >20:1           | 98                 |
| 5 <sup>g</sup> | <b>1</b>      | OCOOMe | toluene | <b>2b</b>         | 70                    | >20:1           | 98                 |
| 6              | ent- <b>1</b> | OCOOMe | toluene | <b>2b</b>         | 88                    | 20:1            | -98                |
| 7              | <b>1</b>      | OCOOMe | toluene | <b>2c</b>         | 89(87)                | >20:1           | 98                 |
| 8              | <b>1</b>      | OCOOMe | toluene | <b>2d</b>         | 81                    | 18:1            | 98                 |
| 9              | <b>1</b>      | OCOOMe | THF     | <b>2b</b>         | 90                    | 6:1             | 92                 |

|    |   |                       |         |    |    |      |    |
|----|---|-----------------------|---------|----|----|------|----|
| 10 | 1 | OCOOMe                | dioxane | 2b | 62 | 6:1  | 97 |
| 11 | 1 | OCOOMe                | DCM     | 2b | 52 | 5:1  | 92 |
| 12 | 1 | OBoc                  | Toluene | 2c | 58 | 14:1 | 95 |
| 13 | 1 | OTroc                 | Toluene | 2c | 85 | 4:1  | -  |
| 14 | 1 | OPO(OEt) <sub>2</sub> | Toluene | 2c | 36 | 2:1  | -  |

<sup>a</sup>See the Supporting Information (SI) for experimental details. Absolute configuration of the allylation product was determined by chemical correlation. <sup>b</sup>Determined by <sup>1</sup>H NMR analysis with mesitylene as the internal standard. Numbers in parentheses correspond to isolated yield. <sup>c</sup>Determined by <sup>1</sup>H NMR analysis of crude reaction mixtures. <sup>d</sup>Determined by chiral HPLC analysis of the major diastereomer. <sup>e</sup>90% conversion of cinnamyl carbonate. <sup>f</sup>4 mol % **2b** was used. 64% conversion of cinnamyl carbonate. <sup>g</sup>Without molecular sieves. 80% conversion of cinnamyl carbonate.

### Procedure for the Synthesis of DBCOT

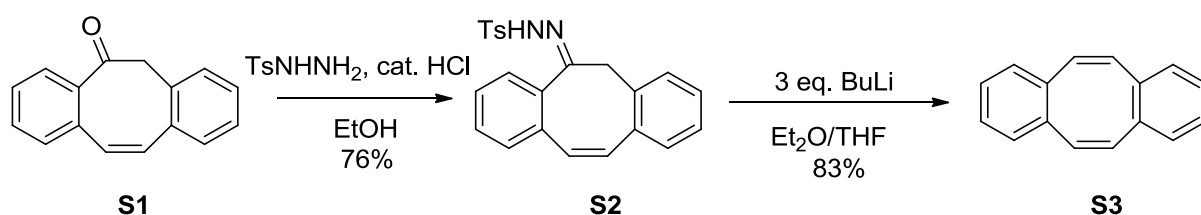

To the 20 mL absolute ethanol solution of **S1**<sup>5</sup> (782 mg, 1.00 equiv, 3.55 mmol) and TsNHNH<sub>2</sub> (727mg, 1.10 equiv, 3.91 mmol) was added 10 μL concentrated hydrochloric acid. The solution was stirred for 12 h. After the reaction was complete, the white precipitate formed was collected by filtration. The precipitate was washed with 1 mL ice-cold ethanol, and was then dried in vacuum to yield white powder **S2** in 76% yield (1.05 g). In a glovebox, **S2** (500 mg, 1.00 equiv, 1.29 mmol) was dissolved in 8 mL THF and 24 mL of ether in a round bottom flask. BuLi (2.42 mL, 1.6 M in hexane, 3.0 equiv, 3.9 mmol) was added to the solution. During this time, the reaction mixture changed to a dark red solution. When the reaction was determined to be complete, according to TLC, in 1 h, the flask was removed from glovebox. The reaction mixture became light yellow when the reaction was quenched with 5 mL saturated NH<sub>4</sub>Cl solution. The mixture was poured into a separatory funnel, and the layers were separated. The aqueous layer was extracted by EtOAc (2 x 5 mL), and the combined organic layers were dried over Na<sub>2</sub>SO<sub>4</sub>, filtered, and concentrated. Flash chromatography over silica gel with hexanes afforded **S3** in 83% (215 mg) as a white powder. <sup>1</sup>H NMR (400 MHz, CDCl<sub>3</sub>) δ 7.16 (dd, *J* = 5.5, 2.5 Hz, 1H), 7.07 (d, *J* = 3.2 Hz, 1H), 6.76 (s, 1H).

### Procedure for the Synthesis of 2c

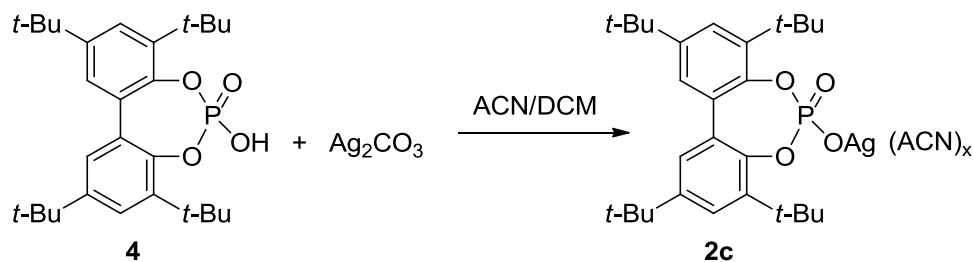

To the 3 mL ACN/DCM (1/1) solution of **4**<sup>6</sup> (2 g, 1.00 equiv, 4.24 mmol) and was added Ag<sub>2</sub>CO<sub>3</sub> (643 mg, 0.55 equiv, 2.33 mmol). The solution was stirred for 2 h. After the reaction was complete, the precipitate was filtered. The solvent was removed to afford **2c** in 95% (2.33 g) yield as an off-white powder. <sup>1</sup>H NMR (500 MHz, CDCl<sub>3</sub>) δ 7.46 (d, *J* = 1.3 Hz, 2H), 7.18 (d, *J* = 2.4 Hz, 2H), 1.55 (s, 18H), 1.33 (s, 18H). <sup>13</sup>C NMR (126 MHz, CDCl<sub>3</sub>) δ 146.9, 139.60, 139.57, 130.7, 126.5, 124.7, 35.5, 34.6, 31.52, 31.46. Anal. Calcd. for C<sub>28</sub>H<sub>40</sub>AgO<sub>4</sub>P·CH<sub>3</sub>CN: C, 58.07; H, 6.98; N, 2.26; found: C, 58.16; H, 6.98; N, 1.96.

### General Procedure for Ir-catalyzed Allylation of Azlactones

In a nitrogen-filled dry-box, the allylic carbonate (0.250 mmol, 1.00 equiv), [Ir(cod)Cl]<sub>2</sub> (0.0050 mmol, 0.0200 equiv), **1** (0.0100 mmol, 0.0400 equiv), **2c** (0.0200 mmol, 0.0800 equiv) and toluene (0.25 mL) were added to a 1-dram vial. The mixture was stirred for 20 min before azlactone (0.550 mmol, 2.20 equiv) and 3 Å MS (50 mg) were added. The vial was sealed with a PTFE/silicone-lined septum cap, removed from the dry-box, and stirred at room temperature for 1-24 h. The reaction progress was monitored by TLC. When the reaction was judged to be complete, the solution was filtered through a 0.5 inch plug of silica gel (eluting with EtOAc) to remove the solid. The crude reaction mixture was concentrated under reduced pressure. CDCl<sub>3</sub> (0.7-0.8 mL) was added to dissolve the crude reaction mixture. The diastereoselectivity was then determined by <sup>1</sup>H NMR spectroscopy. After this analysis, the crude reaction mixture was purified by flash column silica gel chromatography (eluting with hexanes:EtOAc, 16:1 to 3:1) to yield the product.

### (S)-4-methyl-2-phenyl-4-((R)-1-phenylallyl)oxazol-5(4H)-one

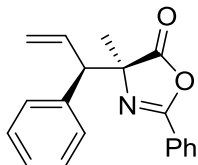

Prepared according to the general procedure using cinnamyl methyl carbonate (48.0 mg, 0.250 mmol), 4-methyl-2-phenyloxazol-5(4H)-one (96.3 mg, 0.550 mmol), [Ir(cod)Cl]<sub>2</sub> (3.36 mg, 0.0050 mmol), **1** (6.00 mg, 0.0100 mmol) and **2c** (11.6 mg, 0.0200 mmol). The crude mixture was purified by flash column chromatography (hexanes:EtOAc, 16:1 to 6:1) to give the title compound as colorless oil in 87% yield (63.3 mg). The enantiomeric excess was determined by HPLC analysis (254 nm, 25 °C) *t*<sub>R</sub> 28.5 min (major); *t*<sub>R</sub> 21.4 min (minor) [(Chiralcel OJ-H) hexane/*i*-PrOH, 95:5, 1.0 mL/min] to be 98%. [*α*]<sub>D</sub><sup>25</sup> = -72.3° (c 0.7, CH<sub>2</sub>Cl<sub>2</sub>). <sup>1</sup>H NMR (600 MHz, CDCl<sub>3</sub>) δ 8.02 (d, *J* = 8.0 Hz, 2H), 7.58 (t, *J* = 7.0 Hz, 1H), 7.52-7.45 (m, 4H), 7.35 (t, *J* = 7.4 Hz, 2H), 7.30 – 7.23 (m, 1H), 6.03 (dt, *J* = 16.8, 9.6 Hz, 1H), 5.21 (d, *J* = 16.9 Hz, 1H), 5.11 (d, *J* = 10.1 Hz, 1H), 3.71 (d, *J* = 9.5 Hz, 1H), 1.37 (s, 3H). <sup>13</sup>C NMR (151 MHz, CDCl<sub>3</sub>) δ 180.6, 159.8, 138.4, 135.5, 132.6, 129.1, 128.7, 128.5, 128.0, 127.4, 125.8, 118.9, 73.5, 57.5, 22.4.

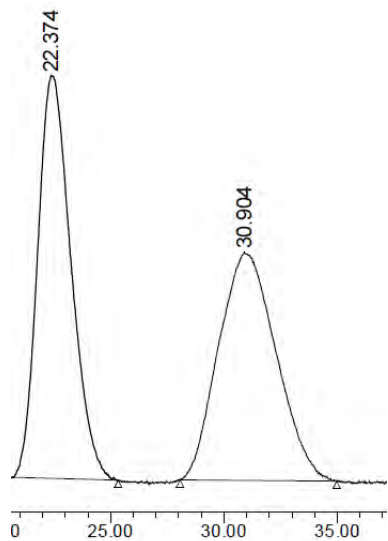

|   | RT (min) | Area ( $\mu\text{V}\cdot\text{sec}$ ) | % Area | Height ( $\mu\text{V}$ ) | % Height |
|---|----------|---------------------------------------|--------|--------------------------|----------|
| 1 | 22.374   | 29768389                              | 50.54  | 291769                   | 63.82    |
| 2 | 30.904   | 29129743                              | 49.46  | 165412                   | 36.18    |

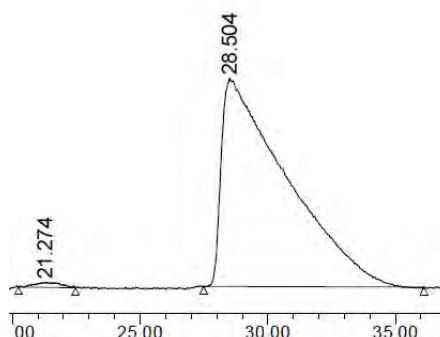

|   | RT (min) | Area ( $\mu\text{V}\cdot\text{sec}$ ) | % Area | Height ( $\mu\text{V}$ ) | % Height |
|---|----------|---------------------------------------|--------|--------------------------|----------|
| 1 | 21.274   | 647490                                | 0.91   | 8750                     | 2.17     |
| 2 | 28.504   | 70318582                              | 99.09  | 395152                   | 97.83    |

**(S)-4-((R)-1-(4-fluorophenyl)allyl)-4-methyl-2-phenyloxazol-5(4H)-one**

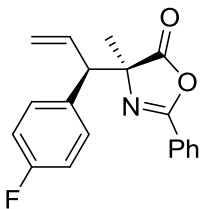

Prepared according to the general procedure using 4-fluorocinnamyl methyl carbonate (52.5 mg, 0.250 mmol), 4-methyl-2-phenyloxazol-5(4H)-one (96.3 mg, 0.550 mmol),  $[\text{Ir}(\text{cod})\text{Cl}]_2$  (3.36 mg, 0.0050 mmol), **1** (6.00 mg, 0.0100 mmol) and **2c** (11.6 mg, 0.0200 mmol). The crude mixture was purified by flash column chromatography (hexanes:EtOAc, 16:1 to 6:1) to give the title compound as colorless oil in 85% yield (65.7 mg). The enantiomeric excess was determined by HPLC analysis (254 nm, 25 °C)  $t_R$  15.1 min (major);  $t_R$  17.0 min (minor) [(Chiralpak AD-H) hexane/*i*-PrOH, 99.5:0.5, 0.5 mL/min] to be 98%.  $[\alpha]_D^{25} = -98.0^\circ$  (c 0.4,  $\text{CH}_2\text{Cl}_2$ ).  $^1\text{H}$  NMR (600 MHz,  $\text{CDCl}_3$ )  $\delta$  8.01 (d,  $J = 7.8$  Hz, 2H), 7.59 (t,  $J = 7.3$  Hz, 1H), 7.50 (t,  $J = 7.3$  Hz, 2H), 7.47 – 7.38 (m, 2H), 7.03 (t,  $J = 8.1$  Hz, 2H), 5.97 (dt,  $J = 16.8, 10.2$  Hz, 1H), 5.18 (d,  $J = 16.9$  Hz, 1H), 5.11 (d,  $J = 10.1$  Hz, 1H), 3.69 (d,  $J = 9.4$  Hz, 1H), 1.34 (s, 3H).  $^{13}\text{C}$  NMR (151 MHz,  $\text{CDCl}_3$ )  $\delta$  180.4, 162.1 (d,  $J = 246$  Hz), 159.9, 135.3, 134.1 (d,  $J = 3.8$  Hz), 132.7, 130.7 (d,  $J = 7.9$  Hz), 128.7, 127.9, 125.7, 119.0, 115.3 (d,  $J = 21.2$  Hz), 73.3, 56.6, 22.4.

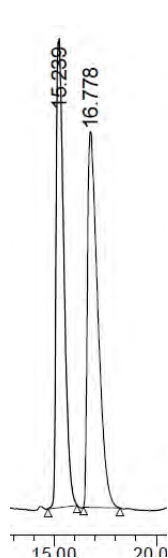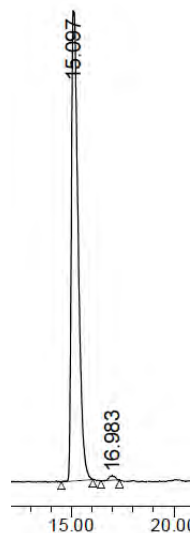

|   | RT (min) | Area ( $\mu\text{V}\cdot\text{sec}$ ) | % Area | Height ( $\mu\text{V}$ ) | % Height |
|---|----------|---------------------------------------|--------|--------------------------|----------|
| 1 | 15.239   | 41408107                              | 48.10  | 1575794                  | 55.47    |
| 2 | 16.778   | 44681139                              | 51.90  | 1264908                  | 44.53    |

|   | RT (min) | Area ( $\mu\text{V}\cdot\text{sec}$ ) | % Area | Height ( $\mu\text{V}$ ) | % Height |
|---|----------|---------------------------------------|--------|--------------------------|----------|
| 1 | 15.097   | 28034297                              | 99.09  | 1225476                  | 99.01    |
| 2 | 16.983   | 258300                                | 0.91   | 12223                    | 0.99     |

**(S)-4-((R)-1-(4-chlorophenyl)allyl)-4-methyl-2-phenyloxazol-5(4H)-one**

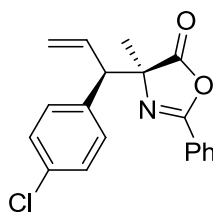

Prepared according to the general procedure using 4-chlorocinnamyl methyl carbonate (56.6 mg, 0.250 mmol), 4-methyl-2-phenyloxazol-5(4H)-one (96.3 mg, 0.550 mmol),  $[\text{Ir}(\text{cod})\text{Cl}]_2$  (3.36 mg, 0.0050 mmol), **1** (6.00 mg, 0.0100 mmol) and **2c** (11.6 mg, 0.0200 mmol). The crude mixture was purified by flash column chromatography (hexanes:EtOAc, 16:1 to 6:1) to give the title compound as white wax in 84% yield (68.3 mg). The enantiomeric excess was determined by HPLC analysis (254 nm, 25 °C)  $t_R$  4.43 min (major);  $t_R$  4.78 min (minor) [(Chiralpak AD-H) hexane/*i*-PrOH, 95:5, 1.0 mL/min] to be 99%.  $[\alpha]_D^{25} = -121^\circ$  (c 2.5,  $\text{CH}_2\text{Cl}_2$ ).  $^1\text{H}$  NMR (500 MHz,  $\text{CDCl}_3$ )  $\delta$  8.09 – 7.96 (m, 2H), 7.59 (t,  $J = 7.4$  Hz, 1H), 7.50 (t,  $J = 7.7$  Hz, 2H), 7.41 (d,  $J = 8.4$  Hz, 2H), 7.32 (d,  $J = 8.4$  Hz, 2H), 5.94 (dt,  $J = 17.0, 9.8$  Hz, 1H), 5.19 (d,  $J = 16.9$  Hz, 1H), 5.11 (d,  $J = 10.2$  Hz, 1H), 3.68 (d,  $J = 9.4$  Hz, 1H), 1.34 (s, 3H).  $^{13}\text{C}$  NMR (126 MHz,  $\text{CDCl}_3$ ) 180.4, 160.1, 136.9, 135.1, 133.3, 132.9, 130.5, 128.8, 128.7, 128.0, 125.7, 119.3, 73.3, 56.8, 22.5.

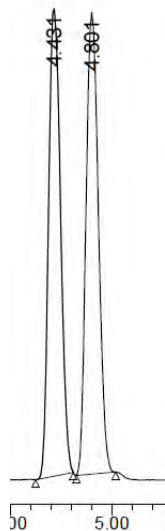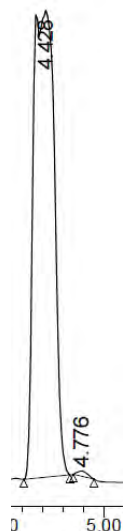

|   | RT (min) | Area (μV*sec) | % Area | Height (μV) | % Height |
|---|----------|---------------|--------|-------------|----------|
| 1 | 4.431    | 14823878      | 49.33  | 1842141     | 50.40    |
| 2 | 4.801    | 15229299      | 50.67  | 1813217     | 49.60    |

|   | RT (min) | Area (μV*sec) | % Area | Height (μV) | % Height |
|---|----------|---------------|--------|-------------|----------|
| 1 | 4.428    | 34020501      | 99.44  | 2405438     | 98.92    |
| 2 | 4.776    | 192890        | 0.56   | 26207       | 1.08     |

**(S)-4-((R)-1-(4-methoxyphenyl)allyl)-4-methyl-2-phenyloxazol-5(4H)-one**

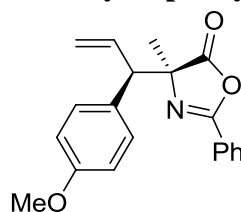

Prepared according to the general procedure using 4-methoxycinnamyl methyl carbonate (55.5 mg, 0.250 mmol), 4-methyl-2-phenyloxazol-5(4H)-one (96.3 mg, 0.550 mmol), [Ir(cod)Cl]<sub>2</sub> (3.36 mg, 0.0050 mmol), **1** (6.00 mg, 0.0100 mmol) and **2c** (11.6 mg, 0.0200 mmol). The crude mixture was purified by flash column chromatography (hexanes:EtOAc, 16:1 to 6:1) to give the title compound as colorless oil in 68% yield (54.6 mg). The enantiomeric excess was determined by HPLC analysis (254 nm, 25 °C) *t*<sub>R</sub> 6.88 min (major); *t*<sub>R</sub> 10.30 min (minor) [(Chiralpak AD-H) hexane/*i*-PrOH, 99:1, 1.0 mL/min] to be >99%. [ $\alpha$ ]<sub>D</sub><sup>25</sup> = -105° (c 1.7, CH<sub>2</sub>Cl<sub>2</sub>). <sup>1</sup>H NMR (600 MHz, CDCl<sub>3</sub>) δ 8.02 (d, *J* = 7.7 Hz, 2H), 7.58 (t, *J* = 7.4 Hz, 1H), 7.49 (t, *J* = 7.6 Hz, 2H), 7.38 (d, *J* = 8.5 Hz, 2H), 6.88 (d, *J* = 8.5 Hz, 2H), 5.99 (dt, *J* = 17.1, 9.8 Hz, 1H), 5.18 (d, *J* = 16.9 Hz, 1H), 5.08 (d, *J* = 10.1 Hz, 1H), 3.79 (s, 3H), 3.66 (d, *J* = 9.4 Hz, 1H), 1.35 (s, 3H). <sup>13</sup>C NMR (151 MHz, CDCl<sub>3</sub>) δ 180.7, 159.8, 158.8, 135.7, 132.6, 130.4, 130.1, 128.7, 127.9, 125.9, 118.5, 113.8, 73.6, 56.7, 55.2, 22.4.

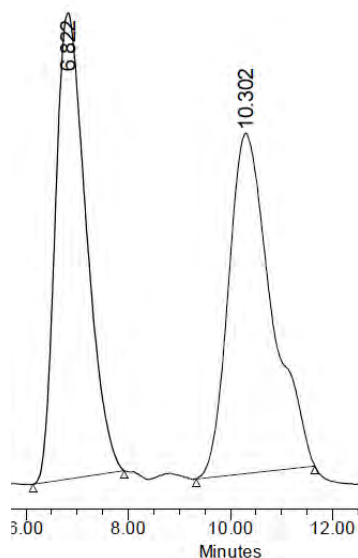

|   | RT (min) | Area ( $\mu\text{V}\cdot\text{sec}$ ) | % Area | Height ( $\mu\text{V}$ ) | % Height |
|---|----------|---------------------------------------|--------|--------------------------|----------|
| 1 | 6.822    | 25245277                              | 49.73  | 601903                   | 57.82    |
| 2 | 10.302   | 25517071                              | 50.27  | 439029                   | 42.18    |

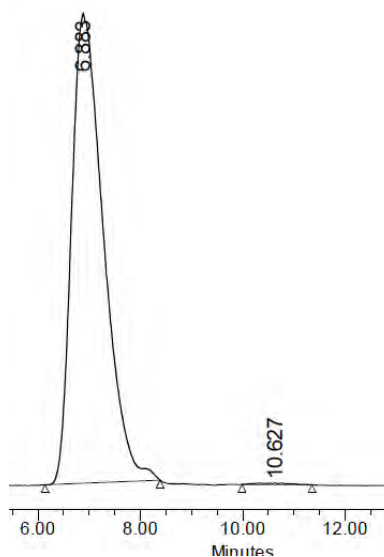

|   | RT (min) | Area ( $\mu\text{V}\cdot\text{sec}$ ) | % Area | Height ( $\mu\text{V}$ ) | % Height |
|---|----------|---------------------------------------|--------|--------------------------|----------|
| 1 | 6.883    | 56108477                              | 99.67  | 1296065                  | 99.67    |
| 2 | 10.627   | 184042                                | 0.33   | 4307                     | 0.33     |

**(S)-4-methyl-2-phenyl-4-((R)-1-(4-(trifluoromethyl)phenyl)allyl)oxazol-5(4H)-one**

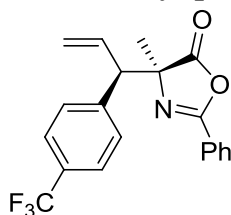

Prepared according to the general procedure using 4-trifluoromethylcinnamyl methyl carbonate (65.0 mg, 0.250 mmol), 4-methyl-2-phenyloxazol-5(4H)-one (96.3 mg, 0.550 mmol),  $[\text{Ir}(\text{cod})\text{Cl}]_2$  (3.36 mg, 0.0050 mmol), **1** (6.00 mg, 0.0100 mmol) and **2c** (11.6 mg, 0.0200 mmol). The crude mixture was purified by flash column chromatography (hexanes:EtOAc, 16:1 to 6:1) to give the title compound as colorless oil in 82% yield (73.6 mg). The enantiomeric excess was determined by HPLC analysis (254 nm, 25 °C)  $t_R$  5.74 min (major);  $t_R$  6.13 min (minor) [(Chiralpak AD-H) hexane/*i*-PrOH, 99.5:0.5, 1.0 mL/min] to be 94%.  $[\alpha]_D^{25} = -105^\circ$  (c 2.0,  $\text{CH}_2\text{Cl}_2$ ).  $^1\text{H}$  NMR (500 MHz,  $\text{CDCl}_3$ )  $\delta$  8.12 – 7.95 (m, 2H), 7.69 – 7.56 (m, 5H), 7.51 (t,  $J = 7.7$  Hz, 2H), 5.95 (dt,  $J = 17.0, 9.8$  Hz, 1H), 5.22 (d,  $J = 16.9$  Hz, 1H), 5.13 (dd,  $J = 10.2, 0.8$  Hz, 1H), 3.77 (d,  $J = 9.4$  Hz, 1H), 1.34 (s, 3H).  $^{13}\text{C}$  NMR (126 MHz,  $\text{CDCl}_3$ )  $\delta$  180.2, 160.2, 142.5, 134.8, 132.9, 129.62, 129.63 (q,  $J = 32.6$  Hz), 128.9, 128.0, 125.6, 125.5 (q,  $J = 3.78$  Hz), 124.1 (q,  $J = 272$  Hz), 119.8, 73.2, 57.1, 22.4. HRMS (ESI) Calcd. for  $\text{C}_{20}\text{H}_{16}\text{NO}_2\text{F}_3$  ( $[\text{M}]^+$ ): 359.1133. Found: 359.1132.



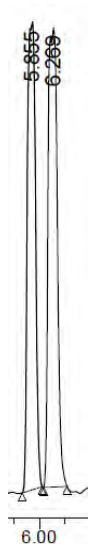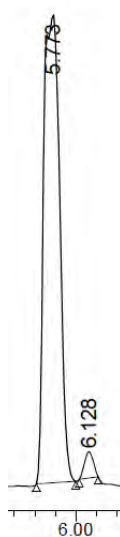

|   | RT (min) | Area (μV*sec) | % Area | Height (μV) | % Height |
|---|----------|---------------|--------|-------------|----------|
| 1 | 5.855    | 20743189      | 47.47  | 1923289     | 50.75    |
| 2 | 6.269    | 22950009      | 52.53  | 1866143     | 49.25    |

|   | RT (min) | Area (μV*sec) | % Area | Height (μV) | % Height |
|---|----------|---------------|--------|-------------|----------|
| 1 | 5.773    | 21623668      | 96.98  | 2022752     | 94.70    |
| 2 | 6.128    | 674481        | 3.02   | 113201      | 5.30     |

**(S)-4-methyl-4-((R)-1-(4-nitrophenyl)allyl)-2-phenyloxazol-5(4H)-one**

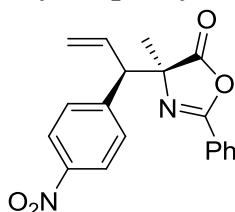

Prepared according to the general procedure using 4-nitrocinnamyl methyl carbonate (59.3 mg, 0.250 mmol), 4-methyl-2-phenyloxazol-5(4H)-one (96.3 mg, 0.550 mmol), [Ir(cod)Cl]<sub>2</sub> (3.36 mg, 0.0050 mmol), **1** (6.00 mg, 0.0100 mmol) and **2c** (11.6 mg, 0.0200 mmol). The crude mixture was purified by flash column chromatography (hexanes:EtOAc, 6:1 to 3:1) to give the title compound as colorless oil in 83% yield (69.7 mg). The enantiomeric excess was determined by HPLC analysis (254 nm, 25 °C) *t*<sub>R</sub> 8.76 min (major); *t*<sub>R</sub> 9.91 min (minor) [(Chiralpak AD-H) hexane/*i*-PrOH, 98:2, 1.0 mL/min] to be 84%. [ $\alpha$ ]<sub>D</sub><sup>25</sup> = -185° (c 1.5, CH<sub>2</sub>Cl<sub>2</sub>). <sup>1</sup>H NMR (500 MHz, CDCl<sub>3</sub>) δ 8.21 (d, *J* = 8.8 Hz, 2H), 8.07 – 7.96 (m, 2H), 7.67 (d, *J* = 8.7 Hz, 2H), 7.60 (t, *J* = 7.4 Hz, 1H), 7.51 (t, *J* = 7.7 Hz, 2H), 5.94 (dt, *J* = 16.9, 9.8 Hz, 1H), 5.23 (d, *J* = 16.9 Hz, 1H), 5.16 (d, *J* = 10.2 Hz, 1H), 3.83 (d, *J* = 9.4 Hz, 1H), 1.35 (s, 4H). <sup>13</sup>C NMR (126 MHz, CDCl<sub>3</sub>) δ 179.9, 160.4, 147.3, 146.0, 134.2, 133.1, 130.2, 128.9, 128.0, 125.4, 123.7, 120.3, 73.0, 57.0, 22.5. HRMS (ESI) Calcd. for C<sub>19</sub>H<sub>17</sub>N<sub>2</sub>O<sub>4</sub> ([M+H]<sup>+</sup>): 337.1188. Found: 337.1189.

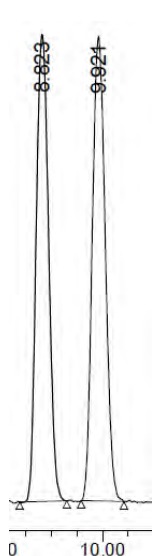

|   | RT (min) | Area (μV*sec) | % Area | Height (μV) | % Height |
|---|----------|---------------|--------|-------------|----------|
| 1 | 8.823    | 11489593      | 48.95  | 688510      | 50.16    |
| 2 | 9.921    | 11983036      | 51.05  | 684230      | 49.84    |

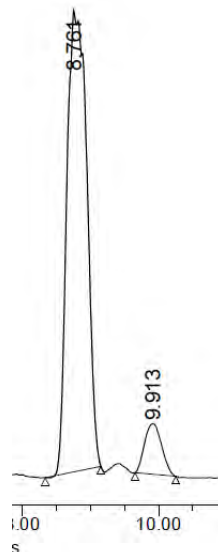

|   | RT (min) | Area (μV*sec) | % Area | Height (μV) | % Height |
|---|----------|---------------|--------|-------------|----------|
| 1 | 8.761    | 33909565      | 91.42  | 1675712     | 90.15    |
| 2 | 9.913    | 3183306       | 8.58   | 183090      | 9.85     |

**(S)-4-((R)-1-(3-fluorophenyl)allyl)-4-methyl-2-phenyloxazol-5(4H)-one**

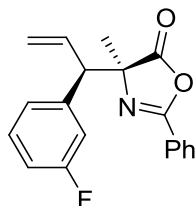

Prepared according to the general procedure using 3-fluorocinnamyl methyl carbonate (52.5 mg, 0.250 mmol), 4-methyl-2-phenyloxazol-5(4H)-one (96.3 mg, 0.550 mmol), [Ir(cod)Cl]<sub>2</sub> (3.36 mg, 0.0050 mmol), **1** (6.00 mg, 0.0100 mmol) and **2c** (11.6 mg, 0.0200 mmol). The crude mixture was purified by flash column chromatography (hexanes:EtOAc, 16:1 to 6:1) to give the title compound as colorless oil in 96% yield (74.2 mg). The enantiomeric excess was determined by HPLC analysis of methanolysis product (254 nm, 25 °C) *t*<sub>R</sub> 9.97 min (major); *t*<sub>R</sub> 13.08 min (minor) [(Chiralpak AS-H) hexane/*i*-PrOH, 98:2, 1.0 mL/min] to be >99%. [*α*]<sub>D</sub><sup>25</sup> = -82.7° (c 2.5, CH<sub>2</sub>Cl<sub>2</sub>). <sup>1</sup>H NMR (600 MHz, CDCl<sub>3</sub>) δ 8.03 (d, *J* = 7.3 Hz, 2H), 7.59 (t, *J* = 7.2 Hz, 1H), 7.51 (t, *J* = 7.1 Hz, 2H), 7.37 – 7.25 (m, 2H), 7.22 (d, *J* = 7.4 Hz, 1H), 6.98 (t, *J* = 8.2 Hz, 1H), 6.06 – 5.82 (dt, *J* = 16.9, 10.0 Hz, 1H), 5.21 (d, *J* = 16.9 Hz, 1H), 5.11 (d, *J* = 10.0 Hz, 1H), 3.70 (d, *J* = 9.2 Hz, 1H), 1.36 (s, 3H). <sup>13</sup>C NMR (151 MHz, CDCl<sub>3</sub>) δ 180.3, 162.7 (d, *J* = 246 Hz), 160.0, 140.8 (d, *J* = 7.1 Hz), 135.0, 132.8, 129.9 (d, *J* = 8.2 Hz), 128.8, 128.0, 125.7, 125.0 (d, *J* = 2.7 Hz), 119.3, 116.0 (d, *J* = 21.9 Hz), 114.3 (d, *J* = 21.1 Hz), 73.3, 57.1, 22.4. HRMS (ESI) Calcd. for C<sub>19</sub>H<sub>16</sub>NO<sub>2</sub>F ([M]<sup>+</sup>): 309.1165. Found: 309.1166.

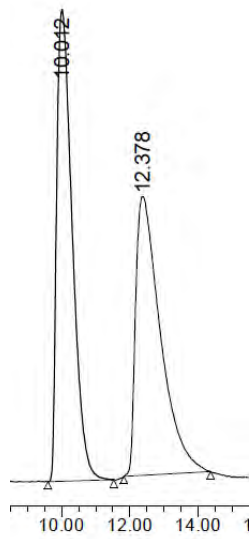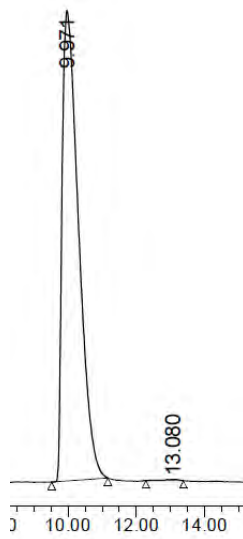

|   | RT (min) | Area ( $\mu\text{V}\cdot\text{sec}$ ) | % Area | Height ( $\mu\text{V}$ ) | % Height |
|---|----------|---------------------------------------|--------|--------------------------|----------|
| 1 | 10.012   | 22290353                              | 51.54  | 703273                   | 62.86    |
| 2 | 12.378   | 20954892                              | 48.46  | 415570                   | 37.14    |

|   | RT (min) | Area ( $\mu\text{V}\cdot\text{sec}$ ) | % Area | Height ( $\mu\text{V}$ ) | % Height |
|---|----------|---------------------------------------|--------|--------------------------|----------|
| 1 | 9.971    | 40784869                              | 99.75  | 1219811                  | 99.71    |
| 2 | 13.080   | 101820                                | 0.25   | 3582                     | 0.29     |

**(S)-4-((R)-1-(2-methoxyphenyl)allyl)-4-methyl-2-phenyloxazol-5(4H)-one**

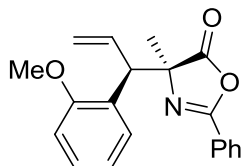

Prepared according to the general procedure using 2-methoxycinnamyl methyl carbonate (55.5 mg, 0.250 mmol), 4-methyl-2-phenyloxazol-5(4H)-one (96.3 mg, 0.550 mmol),  $[\text{Ir}(\text{cod})\text{Cl}]_2$  (3.36 mg, 0.0050 mmol), **1** (6.00 mg, 0.0100 mmol) and **2c** (11.6 mg, 0.0200 mmol). The crude mixture was purified by flash column chromatography (hexanes:EtOAc, 16:1 to 6:1) to give the title compound (7:1 mixture of diastereomers) as colorless oil in 81% yield (65.0 mg). The enantiomeric excess was determined by HPLC analysis (254 nm, 25 °C)  $t_R$  4.69 min (major);  $t_R$  5.09 min (minor) [(Chiralcel OD-H) hexane/*i*-PrOH, 92.5:7.5, 1.0 mL/min] to be 80%.  $[\alpha]_D^{25} = -83.9^\circ$  (c 3.5,  $\text{CH}_2\text{Cl}_2$ ). 7:1 diastereomer mixtures  $^1\text{H}$  NMR (500 MHz,  $\text{CDCl}_3$ )  $\delta$  8.06 (d,  $J = 7.9$  Hz, 2H), 7.71 (d,  $J = 7.6$  Hz, 1H), 7.60 (t,  $J = 7.4$  Hz, 1H), 7.55-7.48 (m, 2H), 7.27 (dd,  $J = 10.7$ , 3.9 Hz, 1H), 7.04 (t,  $J = 7.5$  Hz, 1H), 6.92 (d,  $J = 8.2$  Hz, 1H), 6.08 – 5.80 (dt,  $J = 16.9$ , 10.1 Hz, 1H), 5.24 (d,  $J = 16.9$  Hz, 1H), 5.09 (d,  $J = 10.1$  Hz, 1H), 4.52 (d,  $J = 9.4$  Hz, 1H), 3.88 (s, 3H), 1.39 (s, 3H).  $^{13}\text{C}$  NMR (126 MHz,  $\text{CDCl}_3$ )  $\delta$  181.0, 159.6, 157.2, 135.6, 132.6, 129.7, 128.7, 128.2, 127.9, 126.7, 126.0, 120.7, 118.9, 110.6, 73.8, 55.5, 47.2, 21.8. HRMS (ESI) Calcd. for  $\text{C}_{20}\text{H}_{20}\text{NO}_3$  ( $[\text{M}+\text{H}]^+$ ): 322.1438. Found: 322.1436.

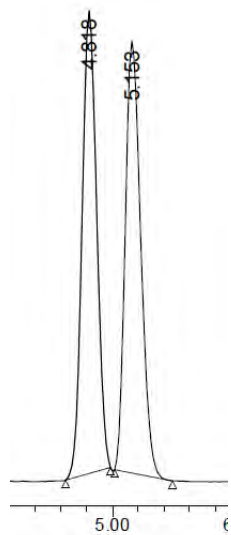

|   | RT (min) | Area (μV*sec) | % Area | Height (μV) | % Height |
|---|----------|---------------|--------|-------------|----------|
| 1 | 4.818    | 11137861      | 50.10  | 1409785     | 51.63    |
| 2 | 5.153    | 11094822      | 49.90  | 1320604     | 48.37    |

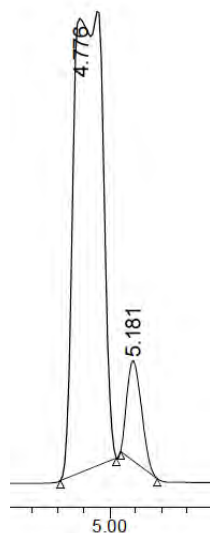

|   | RT (min) | Area (μV*sec) | % Area | Height (μV) | % Height |
|---|----------|---------------|--------|-------------|----------|
| 1 | 4.776    | 32613357      | 90.06  | 2091786     | 81.99    |
| 2 | 5.181    | 3600590       | 9.94   | 459408      | 18.01    |

**(S)-4-((S)-1-(furan-2-yl)allyl)-4-methyl-2-phenyloxazol-5(4H)-one**

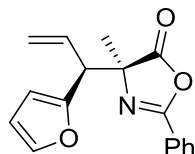

Prepared according to the general procedure using (E)-3-(furan-3-yl)allyl methyl carbonate (45.5 mg, 0.250 mmol), 4-methyl-2-phenyloxazol-5(4H)-one (96.3 mg, 0.550 mmol), [Ir(cod)Cl]<sub>2</sub> (3.36 mg, 0.0050 mmol), **1** (6.00 mg, 0.0100 mmol) and **2c** (11.6 mg, 0.0200 mmol). The crude mixture was purified by flash column chromatography (hexanes:EtOAc, 16:1 to 6:1) to give the title compound (15:1 mixture of diastereomers) as colorless oil in 90% yield (63.2 mg). The enantiomeric excess was determined by HPLC analysis (254 nm, 25 °C) *t*<sub>R</sub> 4.46 min (major); *t*<sub>R</sub> 4.73 min (minor) [(Chiralpak AD-H) hexane/*i*-PrOH, 92.5:7.5, 1.0 mL/min] to be 98%. [ $\alpha$ ]<sub>D</sub><sup>25</sup> = -69.0° (c 2.5, CH<sub>2</sub>Cl<sub>2</sub>). <sup>1</sup>H NMR (400 MHz, CDCl<sub>3</sub>) δ 8.02 – 7.96 (m, 2H), 7.63 – 7.53 (m, 1H), 7.48 (t, *J* = 7.5 Hz, 2H), 7.36-7.33 (m, 1H), 6.43 – 6.26 (m, 2H), 6.00 (dt, *J* = 17.1, 9.8 Hz, 1H), 5.24 (d, *J* = 17.0 Hz, 1H), 5.19 (dd, *J* = 10.1, 1.1 Hz, 1H), 3.90 (d, *J* = 9.4 Hz, 1H), 1.49 (s, 3H). <sup>13</sup>C NMR (101 MHz, CDCl<sub>3</sub>) δ 179.6, 160.2, 151.7, 141.8, 132.6, 132.6, 128.7, 127.9, 125.7, 119.6, 110.3, 107.8, 72.5, 50.9, 22.3. HRMS (ESI) Calcd. for C<sub>17</sub>H<sub>16</sub>NO<sub>3</sub> ([M+H]<sup>+</sup>): 282.1130. Found: 282.1121.

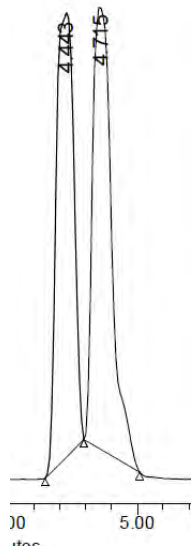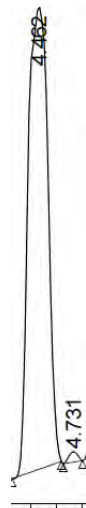

|   | RT (min) | Area ( $\mu\text{V}^*\text{sec}$ ) | % Area | Height ( $\mu\text{V}$ ) | % Height |
|---|----------|------------------------------------|--------|--------------------------|----------|
| 1 | 4.443    | 19501809                           | 48.26  | 2051690                  | 50.27    |
| 2 | 4.715    | 20908536                           | 51.74  | 2029753                  | 49.73    |

|   | RT (min) | Area ( $\mu\text{V}^*\text{sec}$ ) | % Area | Height ( $\mu\text{V}$ ) | % Height |
|---|----------|------------------------------------|--------|--------------------------|----------|
| 1 | 4.462    | 18390618                           | 98.99  | 1724947                  | 97.79    |
| 2 | 4.731    | 187360                             | 1.01   | 38960                    | 2.21     |

***tert*-Butyl 3-((*R*)-1-((*S*)-4-methyl-5-oxo-2-phenyl-4,5-dihydrooxazol-4-yl)allyl)-1H-indole-1-carboxylate**

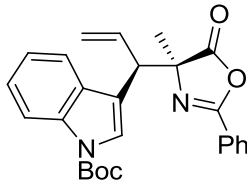

Prepared according to the general procedure using (*E*)-*tert*-butyl 3-(3-((methoxycarbonyl)oxy)prop-1-en-1-yl)-1H-indole-1-carboxylate (82.8 mg, 0.250 mmol), 4-methyl-2-phenyloxazol-5(4H)-one (96.3 mg, 0.550 mmol),  $[\text{Ir}(\text{cod})\text{Cl}]_2$  (3.36 mg, 0.0050 mmol), **1** (6.00 mg, 0.0100 mmol) and **2c** (11.6 mg, 0.0200 mmol). The crude mixture was purified by flash column chromatography (hexanes:EtOAc, 16:1 to 6:1) to give the title compound (15:1 mixture of diastereomers) as colorless oil in 81% yield (87.1 mg). The enantiomeric excess was determined by HPLC analysis (254 nm, 25 °C)  $t_R$  4.46 min (major);  $t_R$  4.73 min (minor) [(Chiralcel OD-H) hexane/*i*-PrOH, 99:1, 1.0 mL/min] to be 95%.  $[\alpha]_D^{25} = -71.9^\circ$  (c 3.5,  $\text{CH}_2\text{Cl}_2$ ).  $^1\text{H}$  NMR (500 MHz,  $\text{CDCl}_3$ )  $\delta$  8.15 (br s, 1H), 8.06 (d,  $J = 7.8$  Hz, 2H), 7.87 (br s, 1H), 7.77 (d,  $J = 7.6$  Hz, 1H), 7.63-7.58 (m, 1H), 7.54-7.48 (m, 2H), 7.37-7.27 (m, 2H), 5.97 (d,  $J = 16.8, 10.1$  Hz, 1H), 5.29 (d,  $J = 16.8$  Hz, 1H), 5.12 (d,  $J = 10.1$  Hz, 1H), 4.08 (d,  $J = 9.2$  Hz, 1H), 1.74 (s, 9H), 1.51 (s, 3H).  $^{13}\text{C}$  NMR (126 MHz,  $\text{CDCl}_3$ )  $\delta$  180.5, 160.0, 149.8, 135.1, 134.7, 132.7, 130.3, 128.8, 128.0, 127.99, 125.7, 124.4, 122.5, 119.6, 119.0, 117.4, 115.2, 83.8, 73.7, 48.1, 28.2, 22.5. HRMS (ESI) Calcd. for  $\text{C}_{26}\text{H}_{27}\text{N}_2\text{O}_4$  ( $[\text{M}+\text{H}]^+$ ): 431.1965. Found: 431.1965.

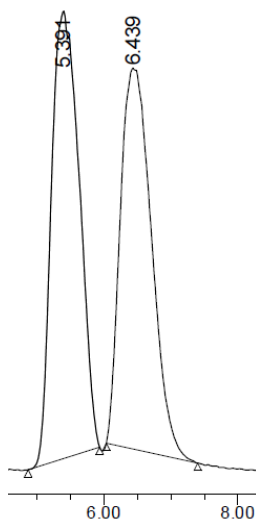

|   | RT (min) | Area (μV*sec) | % Area | Height (μV) | % Height |
|---|----------|---------------|--------|-------------|----------|
| 1 | 5.391    | 36707934      | 51.06  | 1274681     | 54.06    |
| 2 | 6.439    | 35188871      | 48.94  | 1083056     | 45.94    |

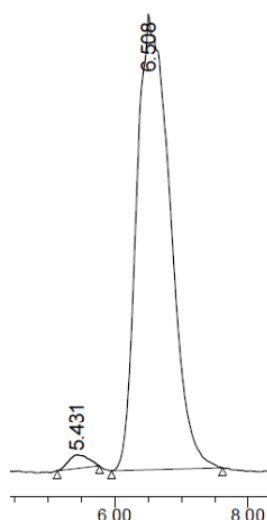

|   | RT (min) | Area (μV*sec) | % Area | Height (μV) | % Height |
|---|----------|---------------|--------|-------------|----------|
| 1 | 5.431    | 883566        | 1.72   | 42203       | 2.84     |
| 2 | 6.508    | 50466422      | 98.28  | 1445280     | 97.16    |

**(S)-4-((R,E)-hexa-1,4-dien-3-yl)-4-methyl-2-phenyloxazol-5(4H)-one**

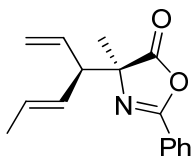

Prepared according to the general procedure using (2E,4E)-hexa-2,4-dien-1-yl methyl carbonate (39.0 mg, 0.250 mmol), 4-methyl-2-phenyloxazol-5(4H)-one (96.3 mg, 0.550 mmol), [Ir(cod)Cl]<sub>2</sub> (3.36 mg, 0.0050 mmol), **1** (6.00 mg, 0.0100 mmol) and **2c** (11.6 mg, 0.0200 mmol). The crude mixture was purified by flash column chromatography (hexanes:EtOAc, 16:1 to 6:1) to give the title compound (14:1:1 mixture of diastereomers and the linear product) as colorless oil in 83% yield (52.9 mg). The enantiomeric excess was determined by HPLC analysis (254 nm, 25 °C)  $t_R$  9.89 min (major);  $t_R$  13.36 min (minor) [(Chiralpak AS-H) hexane/*i*-PrOH, 98:2, 0.8 mL/min] to be 94%.  $[\alpha]_D^{25} = -4.5^\circ$  (c 2.2, CH<sub>2</sub>Cl<sub>2</sub>). <sup>1</sup>H NMR (500 MHz, CDCl<sub>3</sub>) δ 8.02 (d, *J* = 7.5 Hz, 2H), 7.62-7.57(m, 1H), 7.55 – 7.47 (m, 2H), 5.77 – 5.61 (m, 2H), 5.63 – 5.50 (m, 1H), 5.17 (d, *J* = 17.7 Hz, 1H), 5.09 (dd, *J* = 10.2, 1.1 Hz, 1H), 3.12 (t, *J* = 8.6 Hz, 1H), 1.74 (d, *J* = 6.0 Hz, 3H), 1.49 (s, 3H). <sup>13</sup>C NMR (126 MHz, CDCl<sub>3</sub>) δ 180.4, 159.9, 134.9, 132.6, 130.1, 128.7, 127.9, 126.9, 125.9, 118.3, 72.6, 54.7, 22.2, 18.1. HRMS (ESI) Calcd. for C<sub>16</sub>H<sub>18</sub>NO<sub>2</sub> ([M+H]<sup>+</sup>): 256.1338. Found: 256.1334.

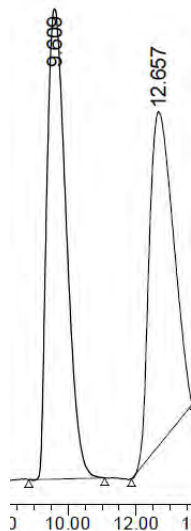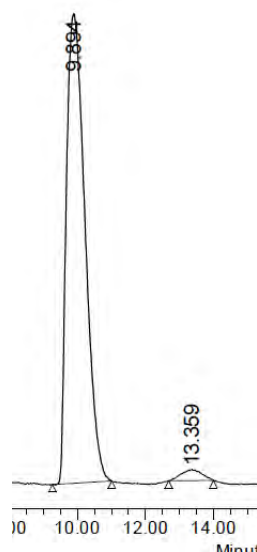

|   | RT (min) | Area ( $\mu\text{V}\cdot\text{sec}$ ) | % Area | Height ( $\mu\text{V}$ ) | % Height |
|---|----------|---------------------------------------|--------|--------------------------|----------|
| 1 | 9.609    | 21249948                              | 53.13  | 540097                   | 58.46    |
| 2 | 12.657   | 18749532                              | 46.87  | 383838                   | 41.54    |

|   | RT (min) | Area ( $\mu\text{V}\cdot\text{sec}$ ) | % Area | Height ( $\mu\text{V}$ ) | % Height |
|---|----------|---------------------------------------|--------|--------------------------|----------|
| 1 | 9.894    | 29386639                              | 97.43  | 778916                   | 97.72    |
| 2 | 13.359   | 775744                                | 2.57   | 18176                    | 2.28     |

**(S)-4-benzyl-2-phenyl-4-((R)-1-phenylallyl)oxazol-5(4H)-one**

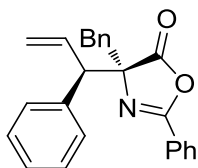

Prepared according to the general procedure using cinnamyl methyl carbonate (48.0 mg, 0.250 mmol), 4-benzyl-2-phenyloxazol-5(4H)-one (138 mg, 0.550 mmol),  $[\text{Ir}(\text{cod})\text{Cl}]_2$  (3.36 mg, 0.0050 mmol), **1** (6.00 mg, 0.0100 mmol) and **2c** (11.6 mg, 0.0200 mmol). The crude mixture was purified by flash column chromatography (hexanes:EtOAc, 16:1 to 6:1) to give the title compound (12:1 mixture of diastereomers) as colorless oil in 83% yield (76.2 mg). The enantiomeric excess was determined by HPLC analysis of methanolysis product (254 nm, 25 °C)  $t_R$  12.62 min (major);  $t_R$  17.25 min (minor) [(Chiralpak AD-H) hexane/*i*-PrOH, 95:5, 1.0 mL/min] to be >99%.  $[\alpha]_D^{25} = -305^\circ$  (c 0.6,  $\text{CH}_2\text{Cl}_2$ ).  $^1\text{H}$  NMR (600 MHz,  $\text{CDCl}_3$ )  $\delta$  7.85 (d,  $J = 7.9$  Hz, 2H), 7.58 (d,  $J = 7.7$  Hz, 2H), 7.52 (t,  $J = 7.3$  Hz, 1H), 7.46 – 7.36 (m, 4H), 7.31 (t,  $J = 7.2$  Hz, 1H), 7.13 – 7.01 (m, 5H), 6.08 (d,  $J = 16.9, 10.1$  Hz, 1H), 5.25 (d,  $J = 16.9$  Hz, 1H), 5.13 (d,  $J = 10.1$  Hz, 1H), 3.91 (d,  $J = 9.4$  Hz, 1H), 3.10 (d,  $J = 13.5$  Hz, 1H), 2.93 (d,  $J = 13.5$  Hz, 1H).  $^{13}\text{C}$  NMR (151 MHz,  $\text{CDCl}_3$ )  $\delta$  179.3, 159.8, 138.5, 135.6, 134.3, 132.4, 130.18, 130.12, 129.2, 128.5, 127.9, 127.8, 127.4, 127.0, 125.6, 118.9, 78.7, 57.4, 42.0.

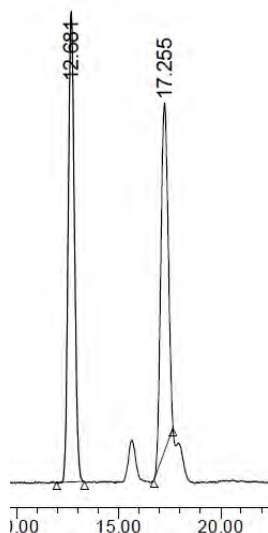

|   | RT (min) | Area ( $\mu\text{V}\cdot\text{sec}$ ) | % Area | Height ( $\mu\text{V}$ ) | % Height |
|---|----------|---------------------------------------|--------|--------------------------|----------|
| 1 | 12.681   | 19454968                              | 53.42  | 921431                   | 57.48    |
| 2 | 17.255   | 16961458                              | 46.58  | 681720                   | 42.52    |

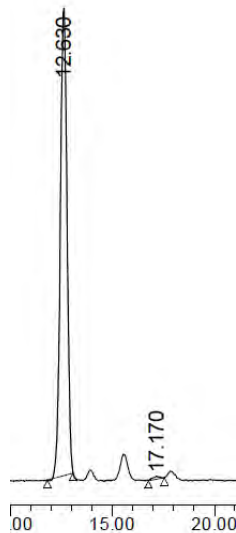

|   | RT (min) | Area ( $\mu\text{V}\cdot\text{sec}$ ) | % Area | Height ( $\mu\text{V}$ ) | % Height |
|---|----------|---------------------------------------|--------|--------------------------|----------|
| 1 | 12.630   | 30002840                              | 99.40  | 1321059                  | 99.39    |
| 2 | 17.170   | 182344                                | 0.60   | 8129                     | 0.61     |

**(S)-4-benzyl-2-phenyl-4-((R)-1-phenylallyl)oxazol-5(4H)-one**

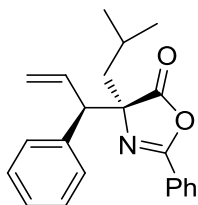

Prepared according to the general procedure using cinnamyl methyl carbonate (48.0 mg, 0.250 mmol), 4-*iso*-butyl-2-phenyloxazol-5(4H)-one (119 mg, 0.550 mmol), [Ir(cod)Cl]<sub>2</sub> (3.36 mg, 0.0050 mmol), **1** (6.00 mg, 0.0100 mmol) and **2c** (11.6 mg, 0.0200 mmol). The crude mixture was purified by flash column chromatography (hexanes:EtOAc, 16:1 to 6:1) to give the title compound (14:1 mixture of diastereomers) as colorless oil in 84% yield (76.2 mg). The enantiomeric excess was determined by HPLC analysis of methanolysis product (254 nm, 25 °C)  $t_R$  8.63 min (major);  $t_R$  11.65 min (minor) [(Chiralpak AD-H) hexane/*i*-PrOH, 95:5, 1.0 mL/min] to be 98%.  $[\alpha]_D^{25} = -110^\circ$  (c 2.0, CH<sub>2</sub>Cl<sub>2</sub>). <sup>1</sup>H NMR (500 MHz, CDCl<sub>3</sub>)  $\delta$  8.03 (d,  $J = 7.3$  Hz, 2H), 7.60 (t,  $J = 7.4$  Hz, 1H), 7.51 (t,  $J = 7.6$  Hz, 2H), 7.44 (d,  $J = 7.4$  Hz, 2H), 7.33 (t,  $J = 7.5$  Hz, 2H), 7.27 (dd,  $J = 13.8, 6.5$  Hz, 1H), 6.07 (dt,  $J = 17.0, 9.9$  Hz, 1H), 5.22 (d,  $J = 16.9$  Hz, 1H), 5.14 (dd,  $J = 10.1, 0.9$  Hz, 1H), 3.70 (d,  $J = 9.6$  Hz, 1H), 1.83 (dd,  $J = 14.2, 6.7$  Hz, 1H), 1.74 (dd,  $J = 14.2, 5.9$  Hz, 1H), 1.52 (dsep,  $J = 13.0, 6.5$  Hz, 1H), 0.83 (d,  $J = 6.6$  Hz, 3H), 0.81 (d,  $J = 6.6$  Hz, 3H). <sup>13</sup>C NMR (126 MHz, CDCl<sub>3</sub>)  $\delta$  180.7, 159.6, 138.6, 135.2, 132.6, 129.1, 128.7, 128.4, 127.9, 127.3, 125.8, 118.9, 77.1, 58.5, 44.4, 25.0, 23.9, 23.3. HRMS (ESI) Calcd. for C<sub>22</sub>H<sub>24</sub>NO<sub>2</sub> ([M+H]<sup>+</sup>): 334.1802. Found: 334.1800.



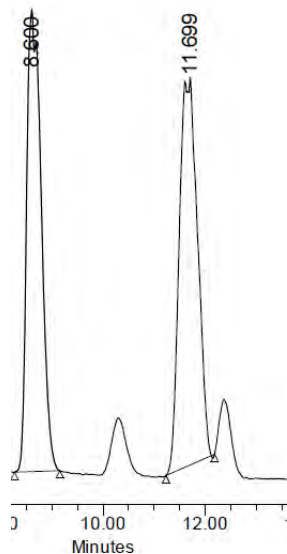

|   | RT (min) | Area (μV*sec) | % Area | Height (μV) | % Height |
|---|----------|---------------|--------|-------------|----------|
| 1 | 8.600    | 33554212      | 48.74  | 1692008     | 54.47    |
| 2 | 11.699   | 35286848      | 51.26  | 1414123     | 45.53    |

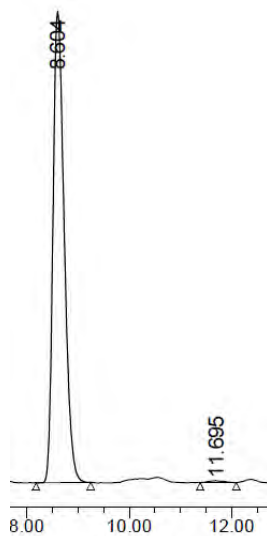

|   | RT (min) | Area (μV*sec) | % Area | Height (μV) | % Height |
|---|----------|---------------|--------|-------------|----------|
| 1 | 8.604    | 18482583      | 99.47  | 1215999     | 99.65    |
| 2 | 11.695   | 97653         | 0.53   | 4317        | 0.35     |

**(S)-4-(2-(methylthio)ethyl)-2-phenyl-4-((R)-1-phenylallyl)oxazol-5(4H)-one**

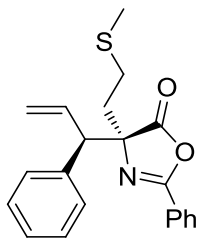

Prepared according to the general procedure using cinnamyl methyl carbonate (48.0 mg, 0.250 mmol), 4-methylthioethyl-2-phenyloxazol-5(4H)-one (129 mg, 0.550 mmol), [Ir(cod)Cl]<sub>2</sub> (3.36 mg, 0.0050 mmol), **1** (6.00 mg, 0.0100 mmol) and **2c** (11.6 mg, 0.0200 mmol). The crude mixture was purified by flash column chromatography (hexanes:EtOAc, 16:1 to 6:1) to give the title compound as colorless oil in 93% yield (81.6 mg). The enantiomeric excess was determined by HPLC analysis (254 nm, 25 °C) *t*<sub>R</sub> 6.21 min (major); *t*<sub>R</sub> 8.53 min (minor) [(Chiralpak AD-H) hexane/*i*-PrOH, 98:2, 1.0 mL/min] to be 98%. [ $\alpha$ ]<sub>D</sub><sup>25</sup> = -71.8° (c 4.1, CH<sub>2</sub>Cl<sub>2</sub>). <sup>1</sup>H NMR (500 MHz, CDCl<sub>3</sub>) δ 8.11 – 7.99 (m, 2H), 7.65 – 7.58 (m, 1H), 7.52 (t, *J* = 7.6 Hz, 2H), 7.49 – 7.43 (m, 2H), 7.35 (t, *J* = 7.5 Hz, 2H), 7.32 – 7.23 (m, 1H), 6.05 (dt, *J* = 16.9, 9.9 Hz, 1H), 5.23 (d, *J* = 16.5 Hz, 1H), 5.14 (dd, *J* = 10.1, 1.2 Hz, 1H), 3.74 (d, *J* = 9.5 Hz, 1H), 2.38 (ddd, *J* = 12.5, 10.5, 4.5 Hz, 1H), 2.30 (ddd, *J* = 12.9, 10.4, 6.3 Hz, 1H), 2.21 (ddd, *J* = 13.9, 10.4, 6.3 Hz, 1H), 2.01 (ddd, *J* = 14.5, 10.4, 4.5 Hz, 1H), 2.00 (s, 3H). <sup>13</sup>C NMR (126 MHz, CDCl<sub>3</sub>) δ 179.9, 160.6, 138.2, 135.0, 132.8, 129.1, 128.8, 128.5, 128.0, 127.5, 125.6, 119.2, 76.6, 57.5, 34.9, 28.6, 15.2. HRMS (ESI) Calcd. for C<sub>21</sub>H<sub>22</sub>NO<sub>2</sub>S ([M+H]<sup>+</sup>): 352.1366. Found: 352.1364.

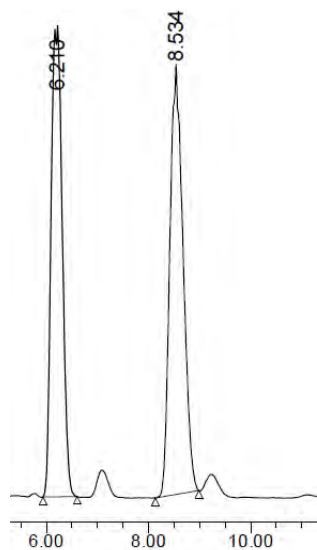

|   | RT (min) | Area (μV*sec) | % Area | Height (μV) | % Height |
|---|----------|---------------|--------|-------------|----------|
| 1 | 6.210    | 30483752      | 47.99  | 1993724     | 52.39    |
| 2 | 8.534    | 33041950      | 52.01  | 1811519     | 47.61    |

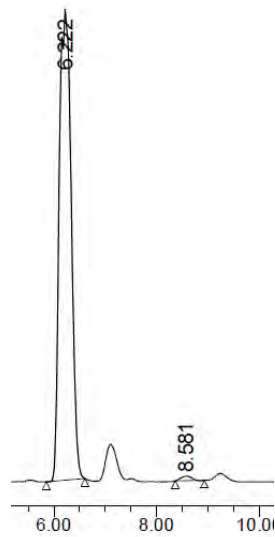

|   | RT (min) | Area (μV*sec) | % Area | Height (μV) | % Height |
|---|----------|---------------|--------|-------------|----------|
| 1 | 6.222    | 37469676      | 99.14  | 2311017     | 99.06    |
| 2 | 8.581    | 324512        | 0.86   | 21861       | 0.94     |

**(S)-4-benzyl-2-phenyl-4-((R)-1-phenylallyl)oxazol-5(4H)-one**

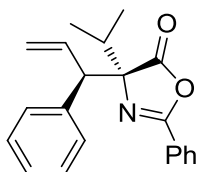

Prepared according to the general procedure using cinnamyl methyl carbonate (48.0 mg, 0.250 mmol), 4-*iso*-propyl-2-phenyloxazol-5(4H)-one (112 mg, 0.550 mmol), [Ir(dbcot)Cl]<sub>2</sub> (4.32 mg, 0.0050 mmol), **1** (6.00 mg, 0.0100 mmol) and **2c** (11.6 mg, 0.0200 mmol). The crude mixture was purified by flash column chromatography (hexanes:EtOAc, 16:1 to 6:1) to give the title compound as colorless oil in 69% yield (55.0 mg). The enantiomeric excess was determined by HPLC analysis of methanolysis product (254 nm, 25 °C) *t*<sub>R</sub> 15.94 min (major); *t*<sub>R</sub> 14.13 min (minor) [(Chiralpak AD-H) hexane/*i*-PrOH, 98:2, 1.0 mL/min] to be 99%. [ $\alpha$ ]<sub>D</sub><sup>25</sup> = -50.3° (c 1.9, CH<sub>2</sub>Cl<sub>2</sub>). <sup>1</sup>H NMR (500 MHz, CDCl<sub>3</sub>) δ 8.05 – 7.98 (m, 2H), 7.59 (t, *J* = 7.4 Hz, 1H), 7.52-7.47 (m, 4H), 7.34-7.27 (m, 2H), 7.26-7.21 (m, 1H), 6.14 (dt, *J* = 17.0, 9.8 Hz, 1H), 5.23 (d, *J* = 17.0 Hz, 1H), 5.14 (dd, *J* = 10.1, 1.1 Hz, 1H), 3.95 (d, *J* = 9.6 Hz, 1H), 2.19 (dsep, *J* = 13.6, 6.8 Hz, 1H), 1.05 (d, *J* = 6.8 Hz, 3H), 0.95 (d, *J* = 6.8 Hz, 3H). <sup>13</sup>C NMR (126 MHz, CDCl<sub>3</sub>) δ 179.3, 159.8, 138.7, 135.7, 132.5, 129.2, 128.7, 128.3, 127.9, 127.2, 125.8, 118.4, 80.3, 54.3, 32.3, 16.7, 16.1. HRMS (ESI) Calcd. for C<sub>21</sub>H<sub>22</sub>NO<sub>2</sub> ([M+H]<sup>+</sup>): 320.1651. Found: 320.1645.

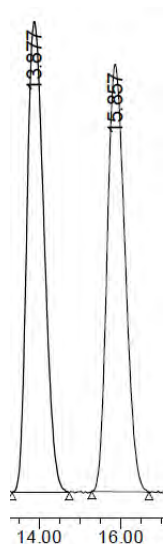

|   | RT (min) | Area (μV*sec) | % Area | Height (μV) | % Height |
|---|----------|---------------|--------|-------------|----------|
| 1 | 13.877   | 10518464      | 51.42  | 361068      | 52.43    |
| 2 | 15.857   | 9936648       | 48.58  | 327615      | 47.57    |

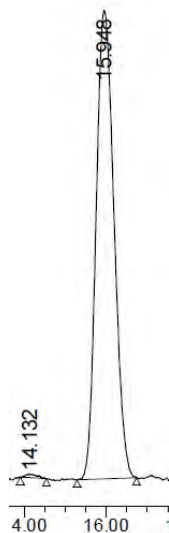

|   | RT (min) | Area (μV*sec) | % Area | Height (μV) | % Height |
|---|----------|---------------|--------|-------------|----------|
| 1 | 14.132   | 32722         | 0.45   | 1720        | 0.71     |
| 2 | 15.948   | 7267014       | 99.55  | 240490      | 99.29    |

## Procedure for Synthesis of 6e

### (S)-4-((R)-1-(3,4-dichlorophenyl)allyl)-4-methyl-2-phenyloxazol-5(4H)-one(6b)

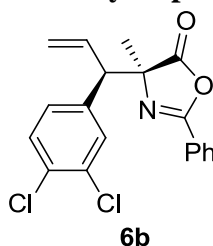

Prepared according to the general procedure using 3,4-dichlorocinnamyl methyl carbonate **6a** (500 mg, 1.92 mmol), 4-methyl-2-phenyloxazol-5(4H)-one (740 mg, 4.22 mmol), [Ir(cod)Cl]<sub>2</sub> (25.8 mg, 0.0384 mmol), **1** (46.1 mg, 0.0768 mmol) and **2c** (89.1 mg, 0.154 mmol). The crude mixture was purified by flash column chromatography (hexanes:EtOAc, 6:1 to 3:1) to give the title compound **6b** as white wax in 93% yield (634 mg).  $[\alpha]_D^{25} = -110^\circ$  (c 3.0, CH<sub>2</sub>Cl<sub>2</sub>). <sup>1</sup>H NMR (500 MHz, CDCl<sub>3</sub>) δ 8.11 – 7.92 (m, 2H), 7.66 – 7.60 (m, 2H), 7.54 (t, *J* = 7.7 Hz, 2H), 7.45 (d, *J* = 8.3 Hz, 1H), 7.36 (dd, *J* = 8.3, 2.1 Hz, 1H), 5.90 (dt, *J* = 16.9, 9.9 Hz, 1H), 5.22 (d, *J* = 16.9 Hz, 1H), 5.15 (d, *J* = 10.0 Hz, 1H), 3.69 (d, *J* = 9.3 Hz, 1H), 1.38 (s, 3H). <sup>13</sup>C NMR (126 MHz, CDCl<sub>3</sub>) δ 180.0, 160.3, 138.6, 134.6, 132.9, 132.4, 131.5, 131.1, 130.4, 128.8, 128.6, 128.0, 125.5, 119.8, 73.1, 56.4, 22.4. HRMS (ESI) Calcd. for C<sub>19</sub>H<sub>17</sub>NO<sub>2</sub>Cl<sub>2</sub> ([M+H]<sup>+</sup>): 360.0553. Found: 360.0552.

### (2S,3R)-methyl 2-benzamido-3-(3,4-dichlorophenyl)-2-methylpent-4-enoate(6c)

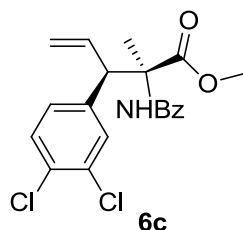

(*S*)-4-((*R*)-1-(3,4-dichlorophenyl)allyl)-4-methyl-2-phenyloxazol-5(4H)-one **6b** (200 mg, 0.557 mmol) was dissolved in 10 mL methanol with anhydrous  $K_2CO_3$  (20 mg, 0.144 mmol). The mixture was stirred for 1 h. After removing the solvent, the crude mixture was purified by flash column chromatography (hexanes:EtOAc, 6:1 to 2:1) to give the title compound **6c** as white wax in 95% yield (207 mg). The enantiomeric excess was determined by HPLC analysis (254 nm, 25 °C)  $t_R$  10.81 min (major);  $t_R$  9.38 min (minor) [(Chiralpak AD-H) hexane/*i*-PrOH, 92.5:7.5, 1.0 mL/min] to be 94%.  $[\alpha]_D^{25} = +11.0^\circ$  (c 0.9,  $CH_2Cl_2$ ).  $^1H$  NMR (500 MHz,  $CDCl_3$ )  $\delta$  7.73 – 7.66 (m, 2H), 7.53 (dd,  $J = 10.6, 4.2$  Hz, 1H), 7.45 (t,  $J = 7.6$  Hz, 2H), 7.34 (d,  $J = 8.3$  Hz, 1H), 7.23 (d,  $J = 2.1$  Hz, 1H), 6.99 – 6.89 (m, 2H), 6.38 (dt,  $J = 16.8, 10.0$  Hz, 1H), 5.44 (d,  $J = 16.9$  Hz, 1H), 5.40 (dd,  $J = 10.1, 1.3$  Hz, 1H), 4.35 (d,  $J = 10.0$  Hz, 1H), 3.80 (s, 3H), 1.78 (s, 3H).  $^{13}C$  NMR (126 MHz,  $CDCl_3$ )  $\delta$  173.0, 166.4, 139.1, 134.9, 134.4, 132.4, 131.7, 131.5, 130.3, 130.2, 128.7, 127.8, 126.7, 120.5, 63.3, 54.4, 52.8, 19.8. HRMS (ESI) Calcd. for  $C_{20}H_{20}Cl_2NO_3$  ( $[M+H]^+$ ): 392.0820. Found: 392.0814. Calcd. for  $C_{20}H_{19}Cl_2NO_3Na$  ( $[M+Na]^+$ ): 414.0640. Found: 414.0634.

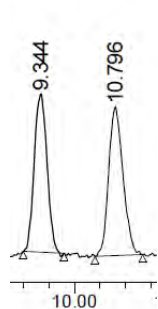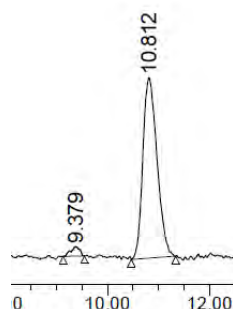

|   | RT (min) | Area ( $\mu V \cdot sec$ ) | % Area | Height ( $\mu V$ ) | % Height |
|---|----------|----------------------------|--------|--------------------|----------|
| 1 | 9.344    | 3030579                    | 48.87  | 174036             | 51.62    |
| 2 | 10.796   | 3170224                    | 51.13  | 163134             | 48.38    |

|   | RT (min) | Area ( $\mu V \cdot sec$ ) | % Area | Height ( $\mu V$ ) | % Height |
|---|----------|----------------------------|--------|--------------------|----------|
| 1 | 9.379    | 170864                     | 3.25   | 14223              | 5.09     |
| 2 | 10.812   | 5085635                    | 96.75  | 265100             | 94.91    |

(*2S,3R*)-methyl 2-benzamido-3-(3,4-dichlorophenyl)-2-methyl-5-(tosyloxy)pentanoate(**6d**)

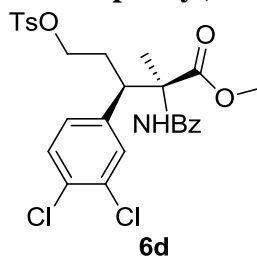

(2*S*,3*R*)-methyl 2-benzamido-3-(3,4-dichlorophenyl)-2-methylpent-4-enoate **6c** (50 mg, 0.128 mmole) was dissolved in dry, degassed THF (0.5 mL) and cooled to -78 °C. Then 9-BBN (0.56 mL as a 0.5 M solution in THF, 0.282 mmol) was added to the reaction vessel. The reaction mixture was stirred for 1 h at -78 °C, then allowed to warm slowly to room temperature and stirred overnight. The resulting solution was cooled to 0 °C, at which time water (1.0 mL), and NaBO<sub>3</sub>·4H<sub>2</sub>O (295 mg, 1.92 mmol) were added. The reaction was allowed to warm to room temperature and was stirred for an additional 6 h. The reaction mixture was diluted with DCM, and then extracted with DCM (3\*3 mL). The organic layer was combined, dried over MgSO<sub>4</sub>, filtered, and concentrated. The crude product was dissolved in DCM (1 mL) and cooled to 0 °C, at which time triethylamine (38.8 mg, 0.383 mmol) and TsCl (53.8 mg, 0.283 mmol) were added. The reaction was allowed to warm to room temperature and stirred for 1 h. The resulted solution was filtered through a 0.5 inch plug of silica gel (eluting with EtOAc) to remove the polar residue. After removing the solvent, the mixture was purified by flash column silica gel chromatography (hexanes:EtOAc, 6:1 to 2:1) to give the title compound **6d** as an colorless oil in 56% yield (40.4 mg). <sup>1</sup>H NMR (500 MHz, CDCl<sub>3</sub>) δ 7.70 (d, *J* = 8.2 Hz, 2H), 7.66 (d, *J* = 7.2 Hz, 2H), 7.53 (t, *J* = 7.4 Hz, 1H), 7.44 (t, *J* = 7.6 Hz, 2H), 7.33 (d, *J* = 8.0 Hz, 2H), 7.25 (d, *J* = 8.3 Hz, 1H), 7.01 (d, *J* = 1.9 Hz, 1H), 6.87 (s, 1H), 6.80 (dd, *J* = 8.3, 1.9 Hz, 1H), 3.99 (ddd, *J* = 10.7, 6.7, 4.0 Hz, 1H), 3.86 – 3.78 (m, 4H), 3.70 (td, *J* = 9.5, 5.6 Hz, 1H), 2.56 – 2.44 (m, 4H), 2.28 – 2.19 (m, 1H), 1.84 (s, 3H). <sup>13</sup>C NMR (126 MHz, CDCl<sub>3</sub>) δ 172.9, 166.8, 145.0, 138.0, 134.5, 132.5, 132.4, 131.8, 131.7, 130.5, 130.3, 129.8, 128.6, 127.8, 126.7, 68.2, 63.9, 52.9, 46.1, 29.3, 21.7, 21.2.

**(2*S*,3*R*)-methyl 1-benzoyl-3-(3,4-dichlorophenyl)-2-methylpyrrolidine-2-carboxylate(**6e**)**

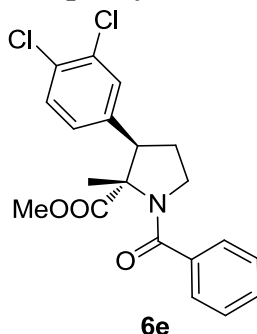

(2*S*,3*R*)-methyl 2-benzamido-3-(3,4-dichlorophenyl)-2-methyl-5-(tosyloxy)pentanoate **6d** (20mg, 0.0355 mmol) and NaH (1.35 mg, 0.0563 mmol) were dissolved in dry DMF (0.5 mL). The mixture was stirred for 12 h at room temperature. After removing the solvent in vacuum, the mixture was purified by flash column silica gel chromatography (hexanes:EtOAc, 6:1 to 3:1) to give the title compound **6e** as an colorless oil in 95% yield (13.2 mg). <sup>1</sup>H NMR (500 MHz, CDCl<sub>3</sub>) δ 7.52-7.48 (m, 2H), 7.47 – 7.37 (m, 4H), 7.24 (d, *J* = 1.8 Hz, 1H), 6.97 (dd, *J* = 8.3, 1.8 Hz, 1H), 3.86 (s, 3H), 3.79 (td, *J* = 10.8, 6.2 Hz, 1H), 3.72 (dd, *J* = 12.9, 5.6 Hz, 1H), 3.70 – 3.64 (m, 1H), 2.49-2.35 (m, 1H), 2.30 – 2.18 (m, 1H), 1.31 (s, 3H). <sup>13</sup>C NMR (126 MHz, CDCl<sub>3</sub>) δ 173.8, 169.1, 136.6, 136.6, 132.6, 131.8, 130.4, 130.1, 129.8, 128.4, 127.8, 126.5, 68.7, 52.7, 51.5, 48.8, 28.3, 16.7. HRMS (ESI) Calcd. for C<sub>20</sub>H<sub>19</sub>NO<sub>3</sub>Na ([M+Na]<sup>+</sup>): 414.0640. Found: 414.0633.

1. Melhado, A. D.; Luparia, M.; Toste, F. D. *J. Am. Chem. Soc.* **2007**, *129*, 12638.
2. Stanley, L. M.; Hartwig, J. F. *Angew. Chem., Int. Ed.* **2009**, *48*, 7841.
3. Polet, D.; Alexakis, A.; Tissot-Croset, K.; Corminboeuf, C.; Ditrich, K. *Chem. -Eur. J* **2006**, *12*, 3596.
4. Stanley, L. M.; Hartwig, J. F. *J. Am. Chem. Soc.* **2009**, *131*, 8971.
5. Chaffins, S.; Brettreich, M.; Wudl, F. *Synthesis* **2002**, 1191.
6. Wuennemann, S.; Froehlich, R.; Hoppe, D. *Eur. J. Org. Chem.* **2008**, 684.

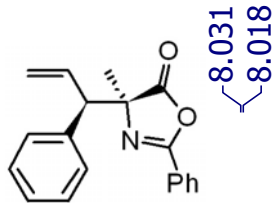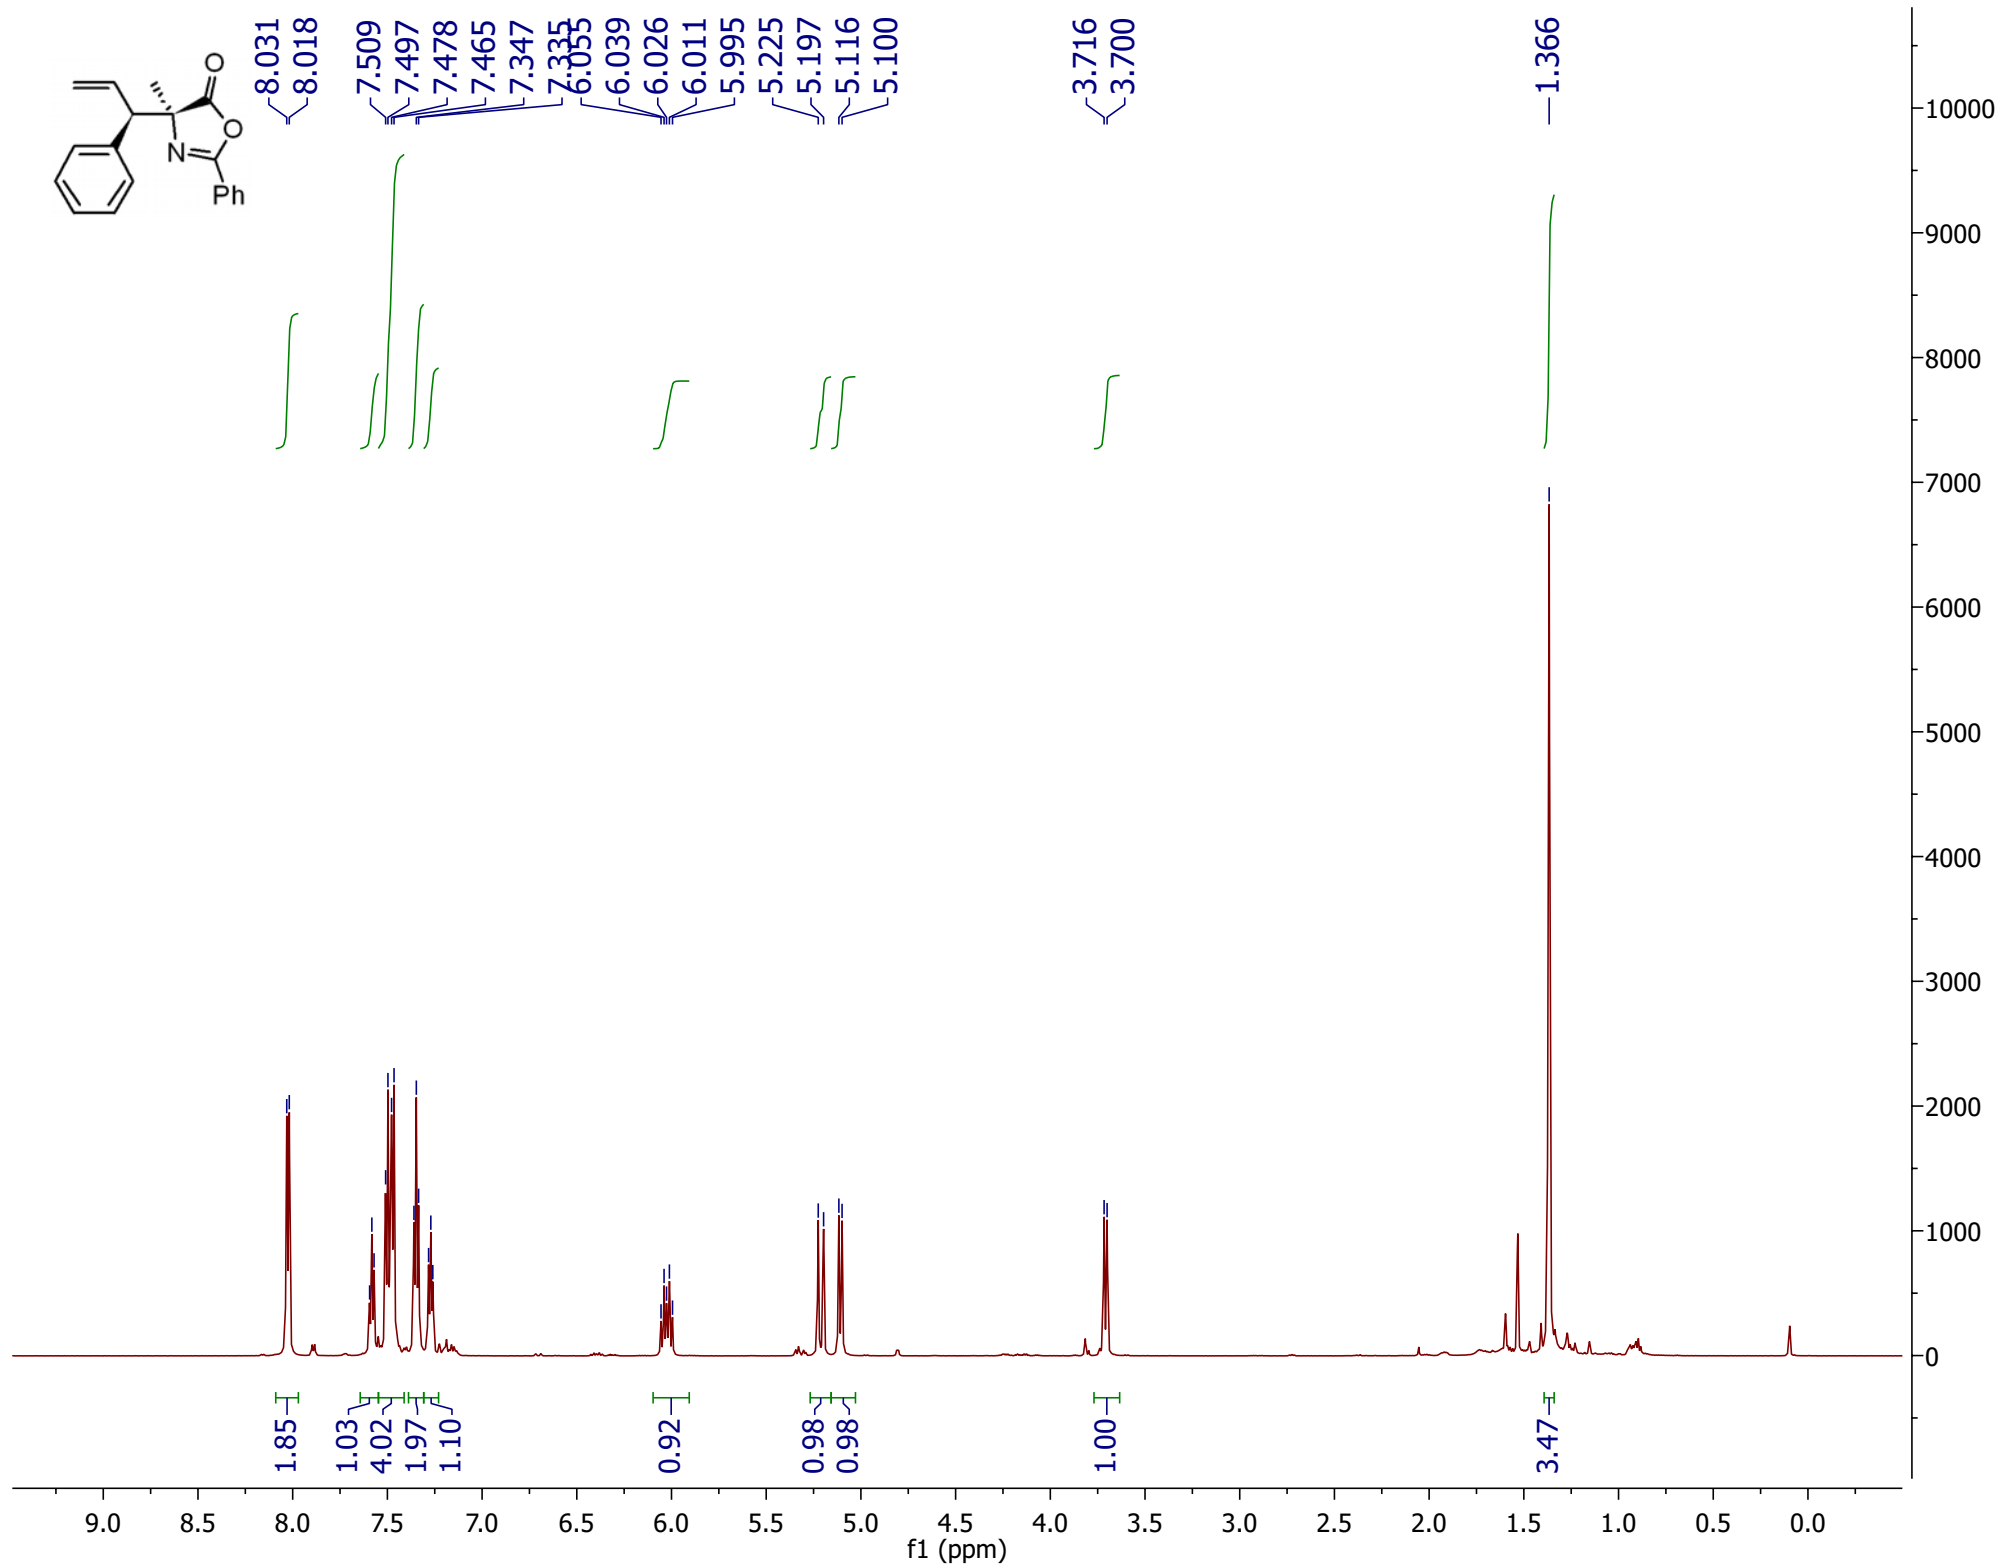

S23

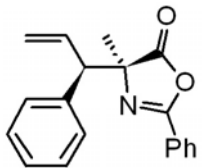

—180.612

—159.814

138.348

135.522

132.655

129.132

128.725

128.467

127.948

127.373

125.823

118.861

—73.482

—57.541

—22.429

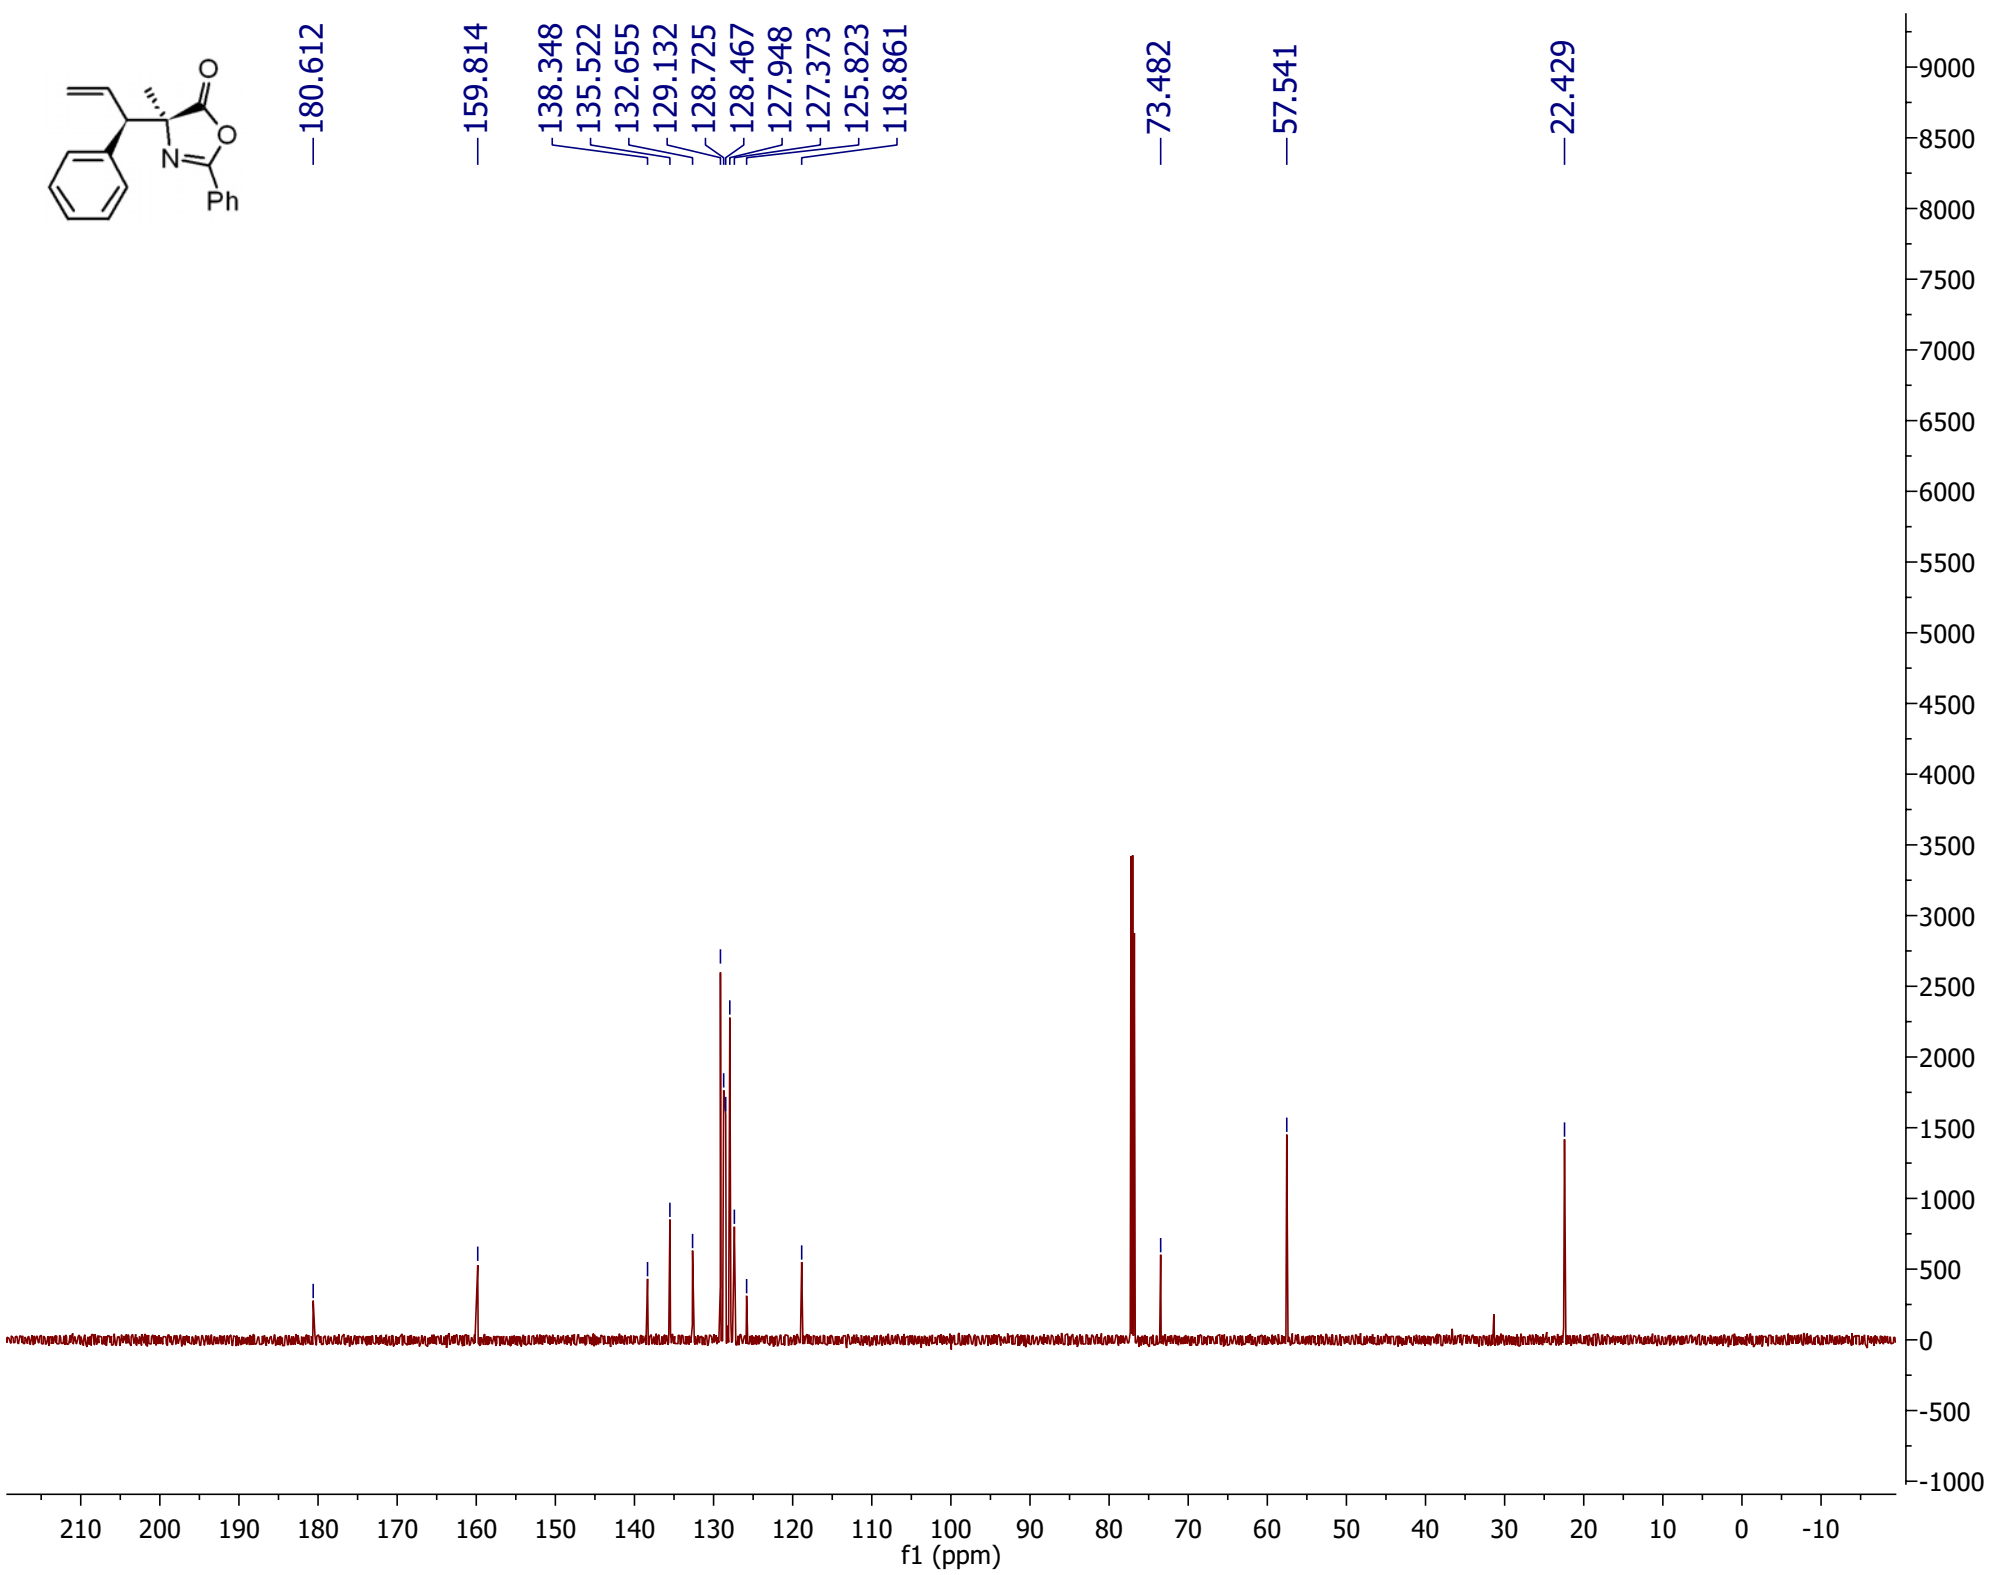

S24



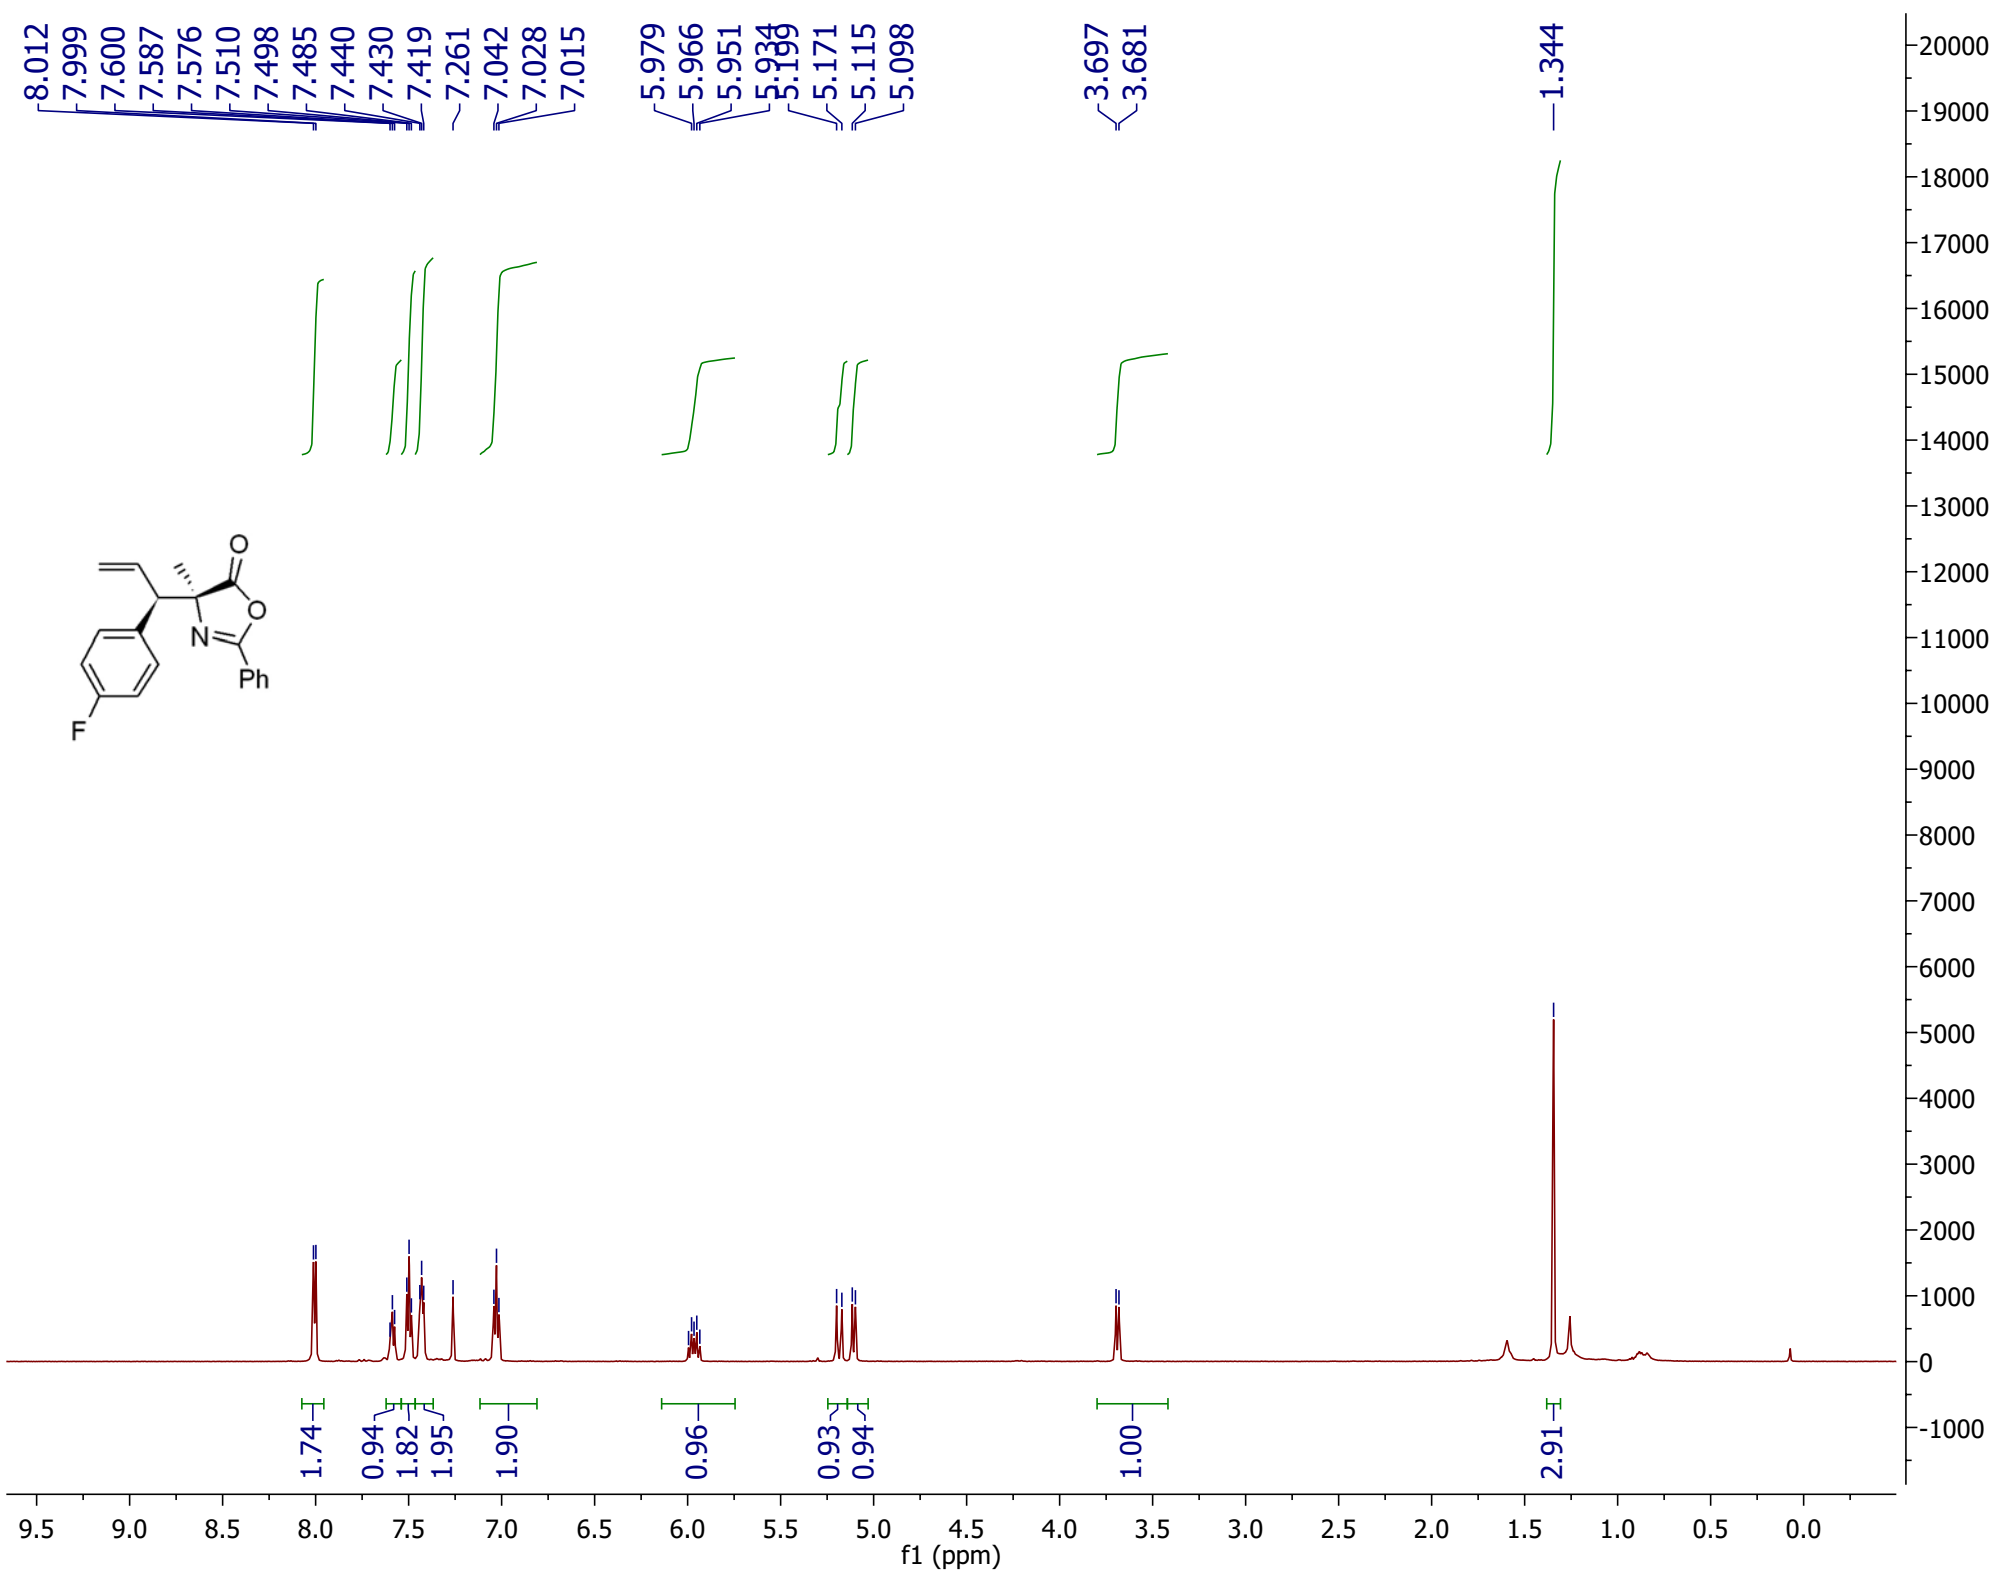

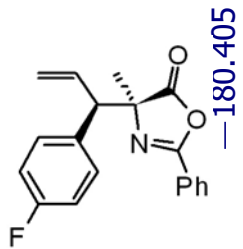

180.405  
162.885  
161.256  
159.935

135.299  
134.103  
132.732  
130.674  
130.621  
128.744  
127.924  
125.703  
119.008  
115.364  
115.223

77.186  
76.974  
76.763  
73.339

56.611

22.401

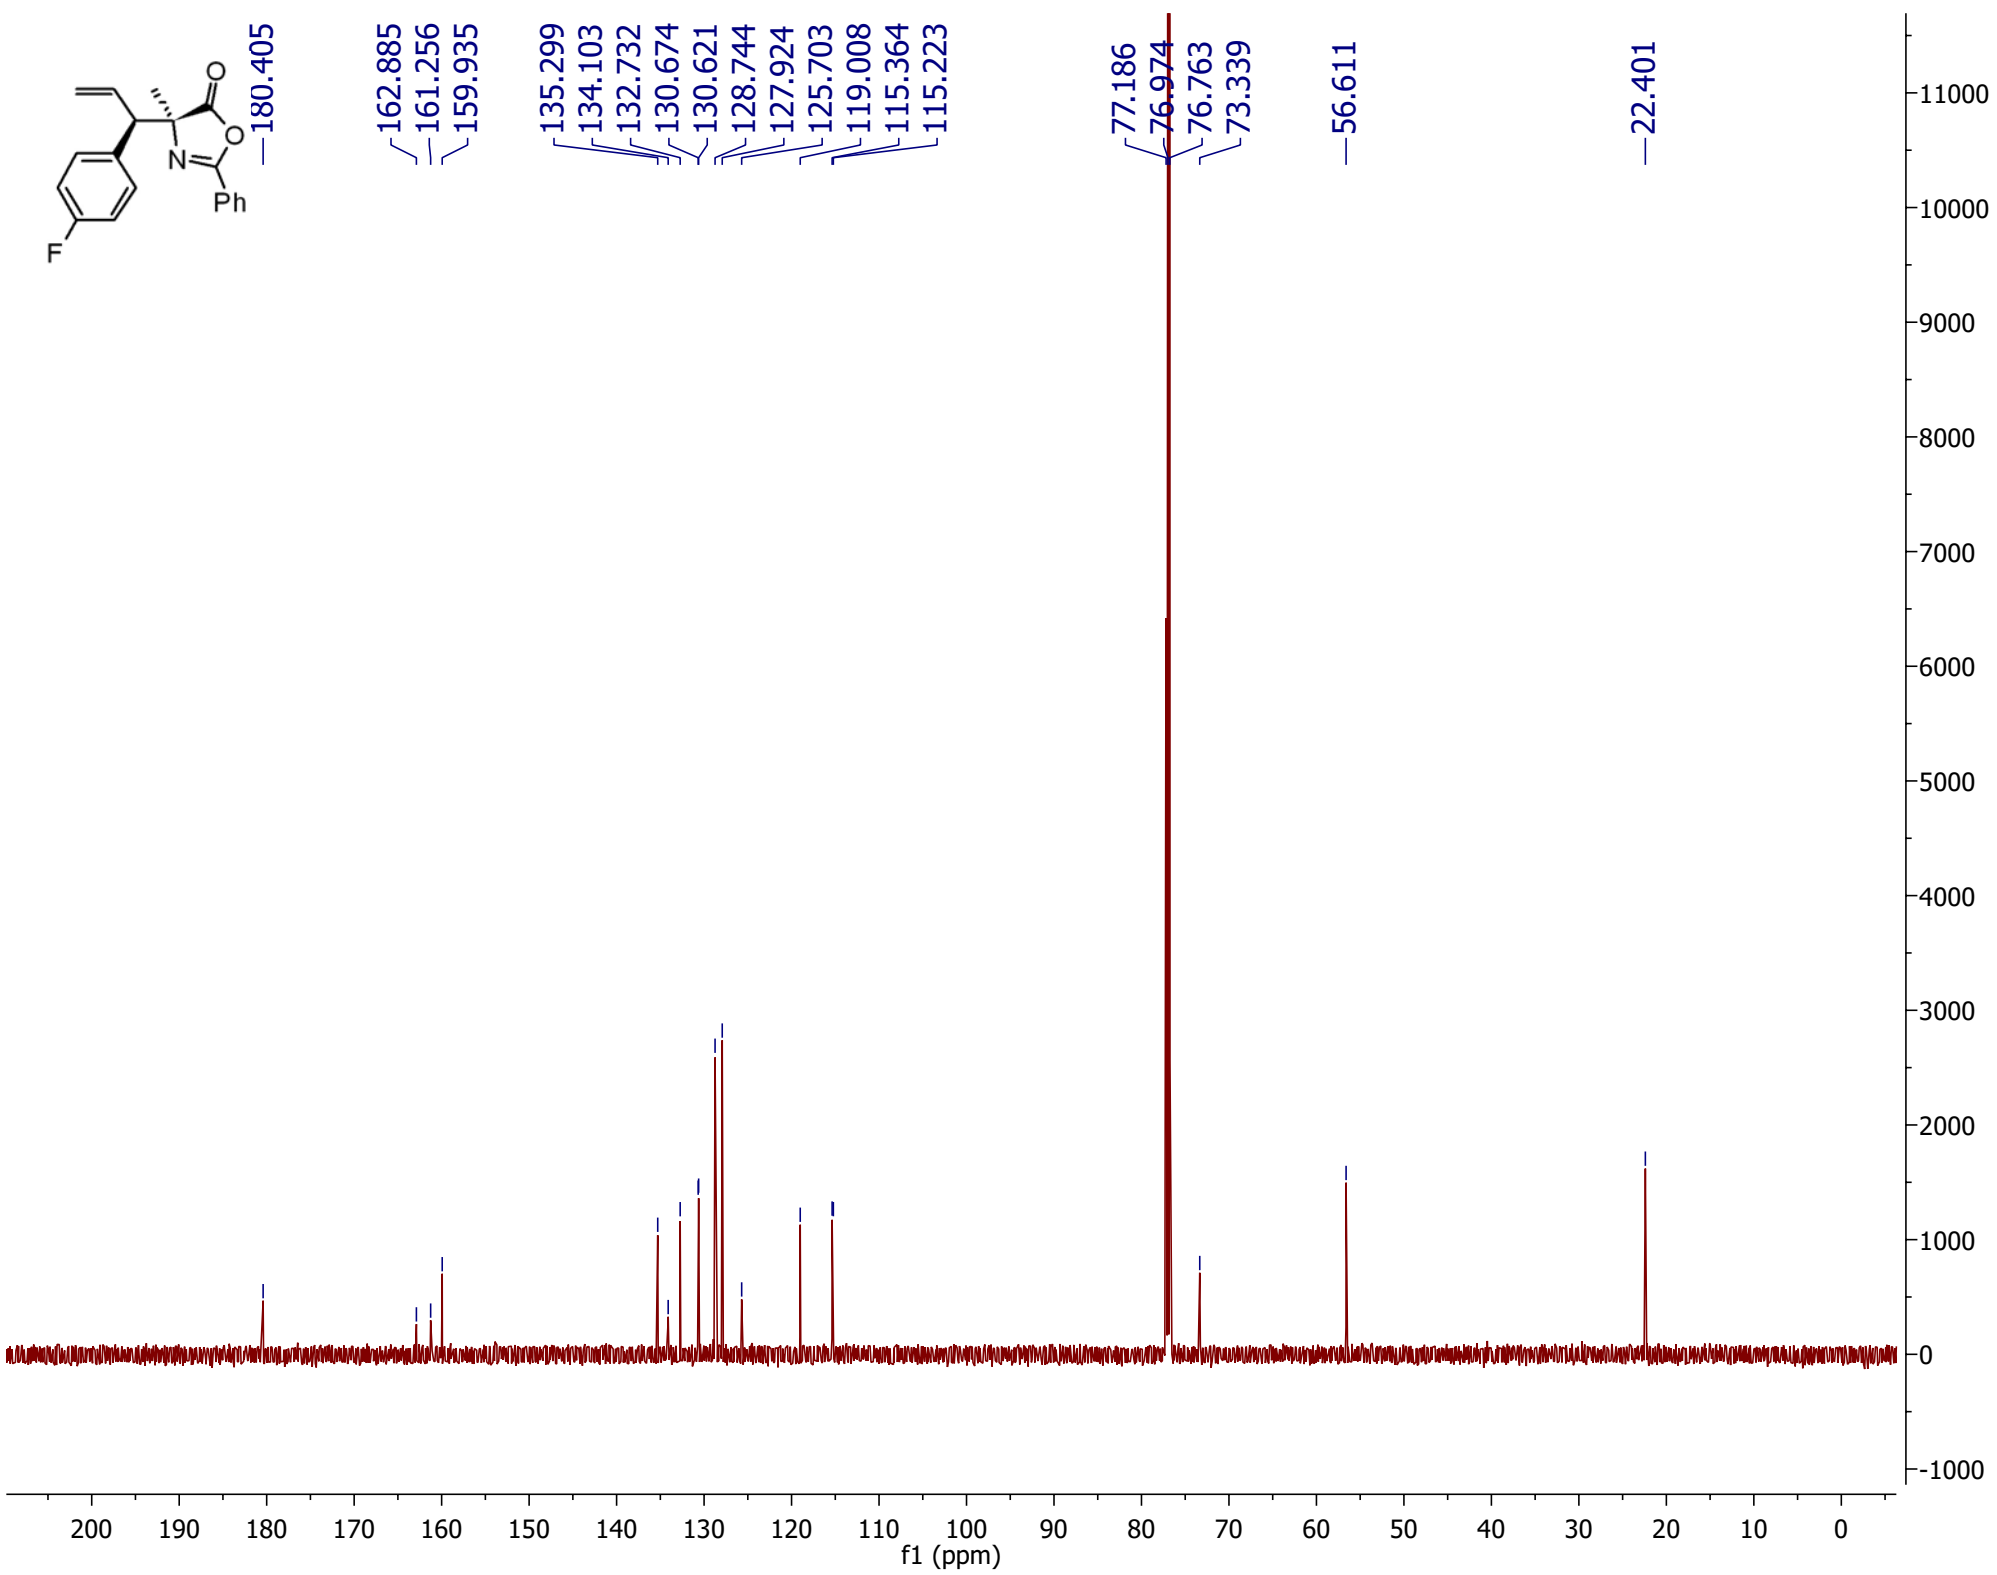

S26

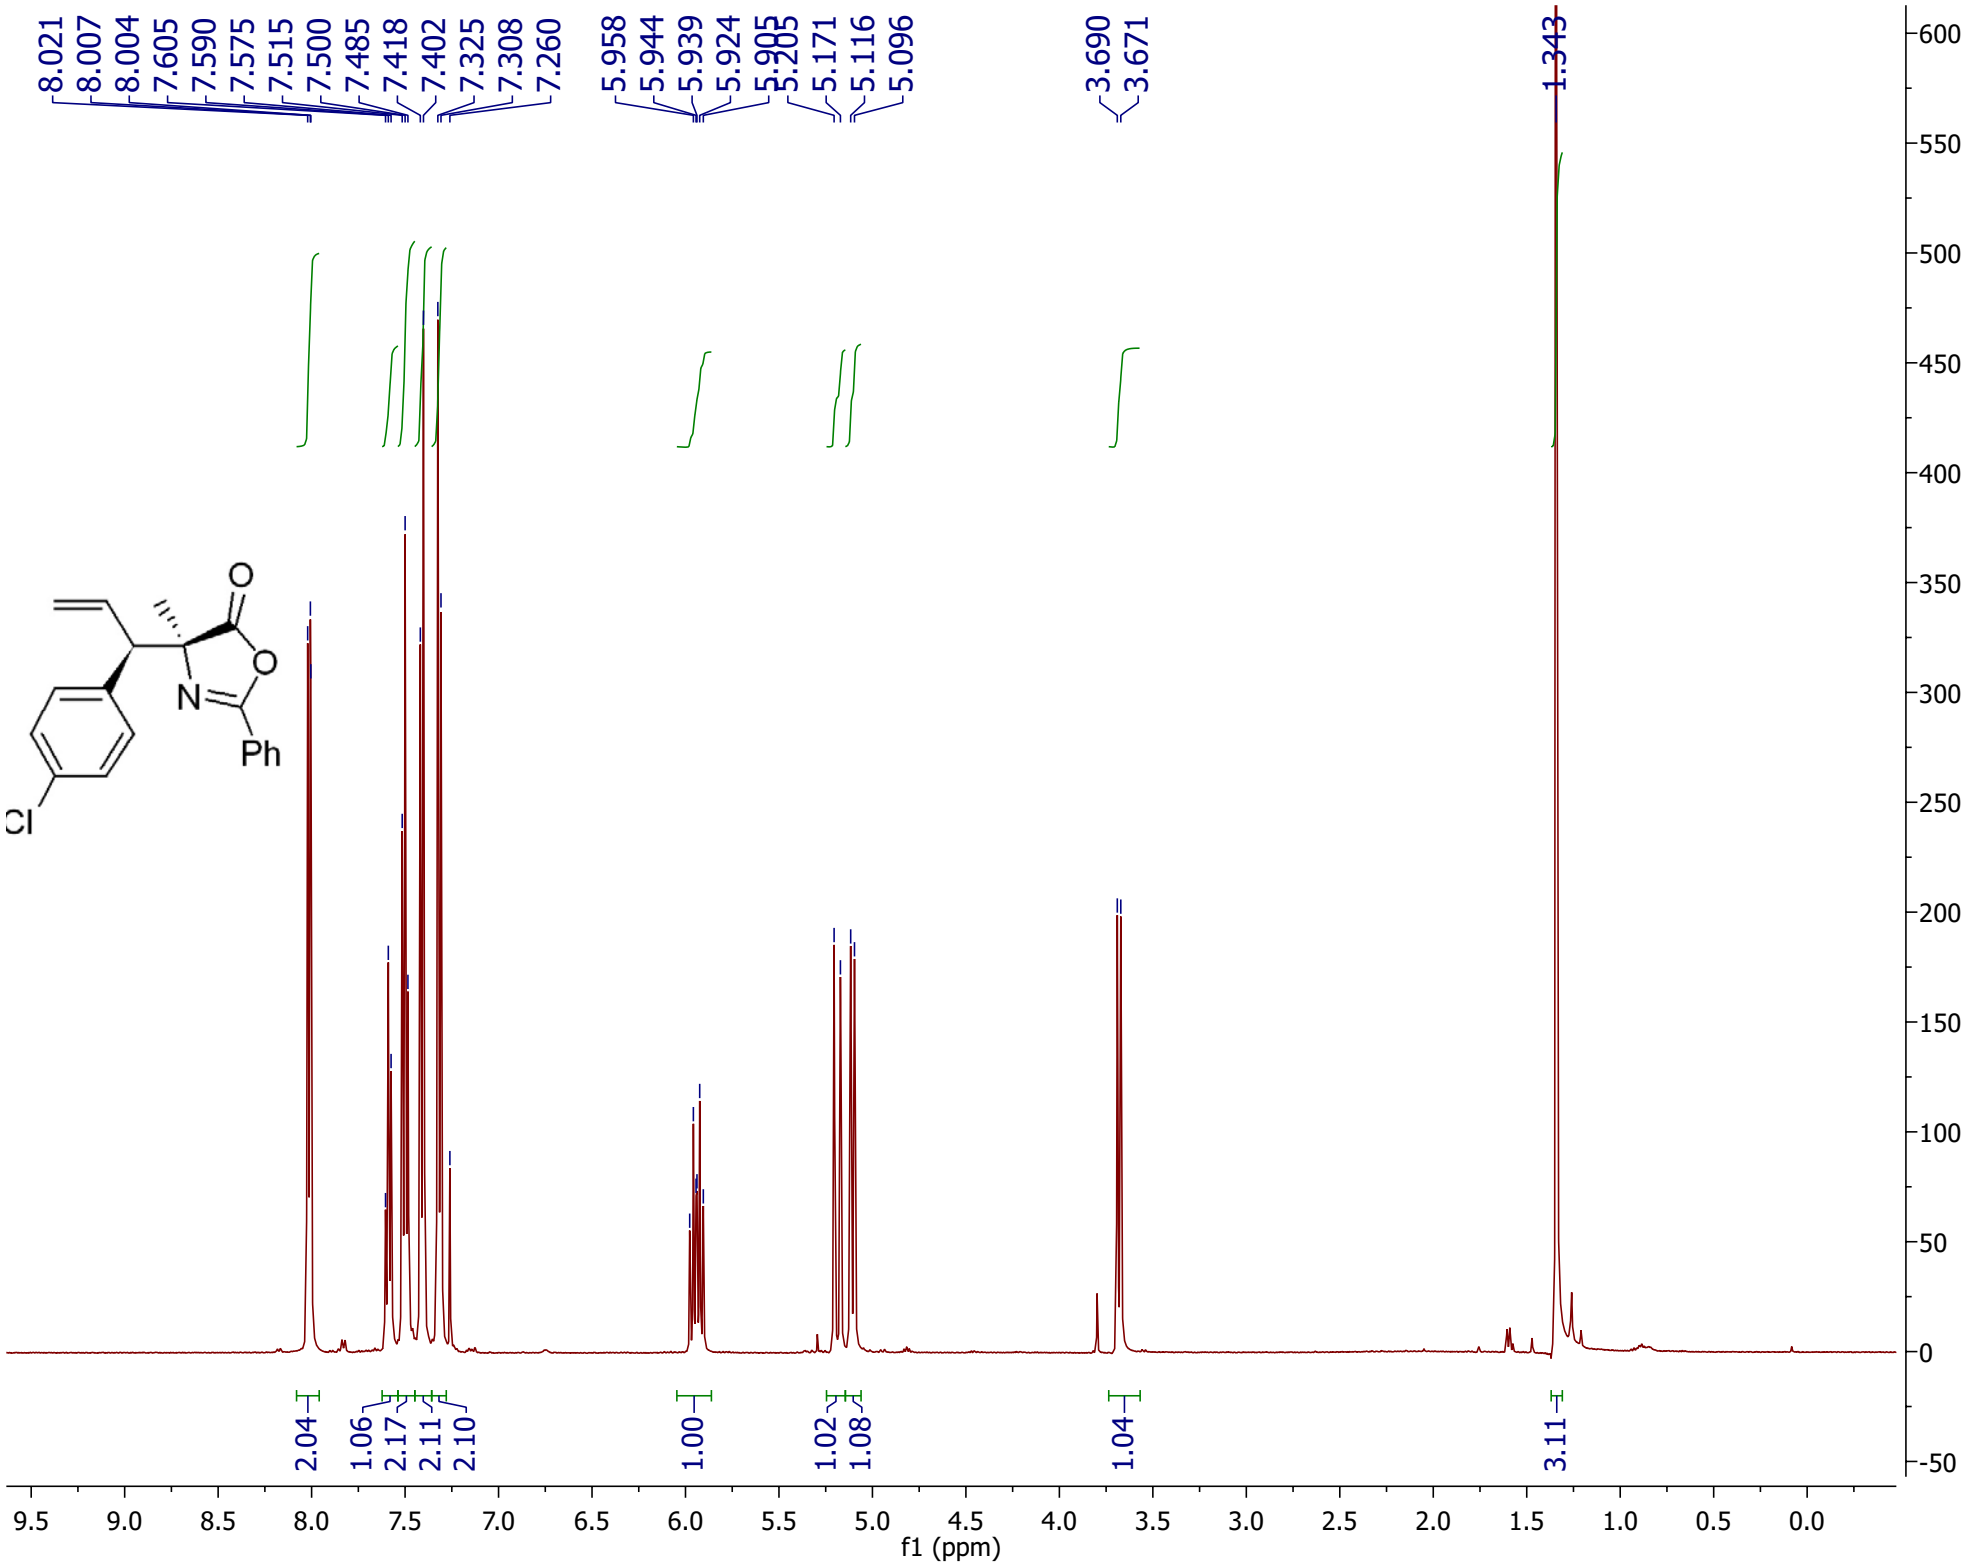

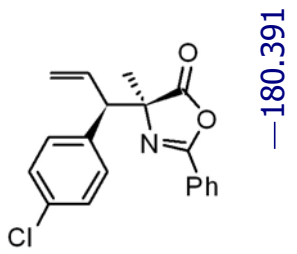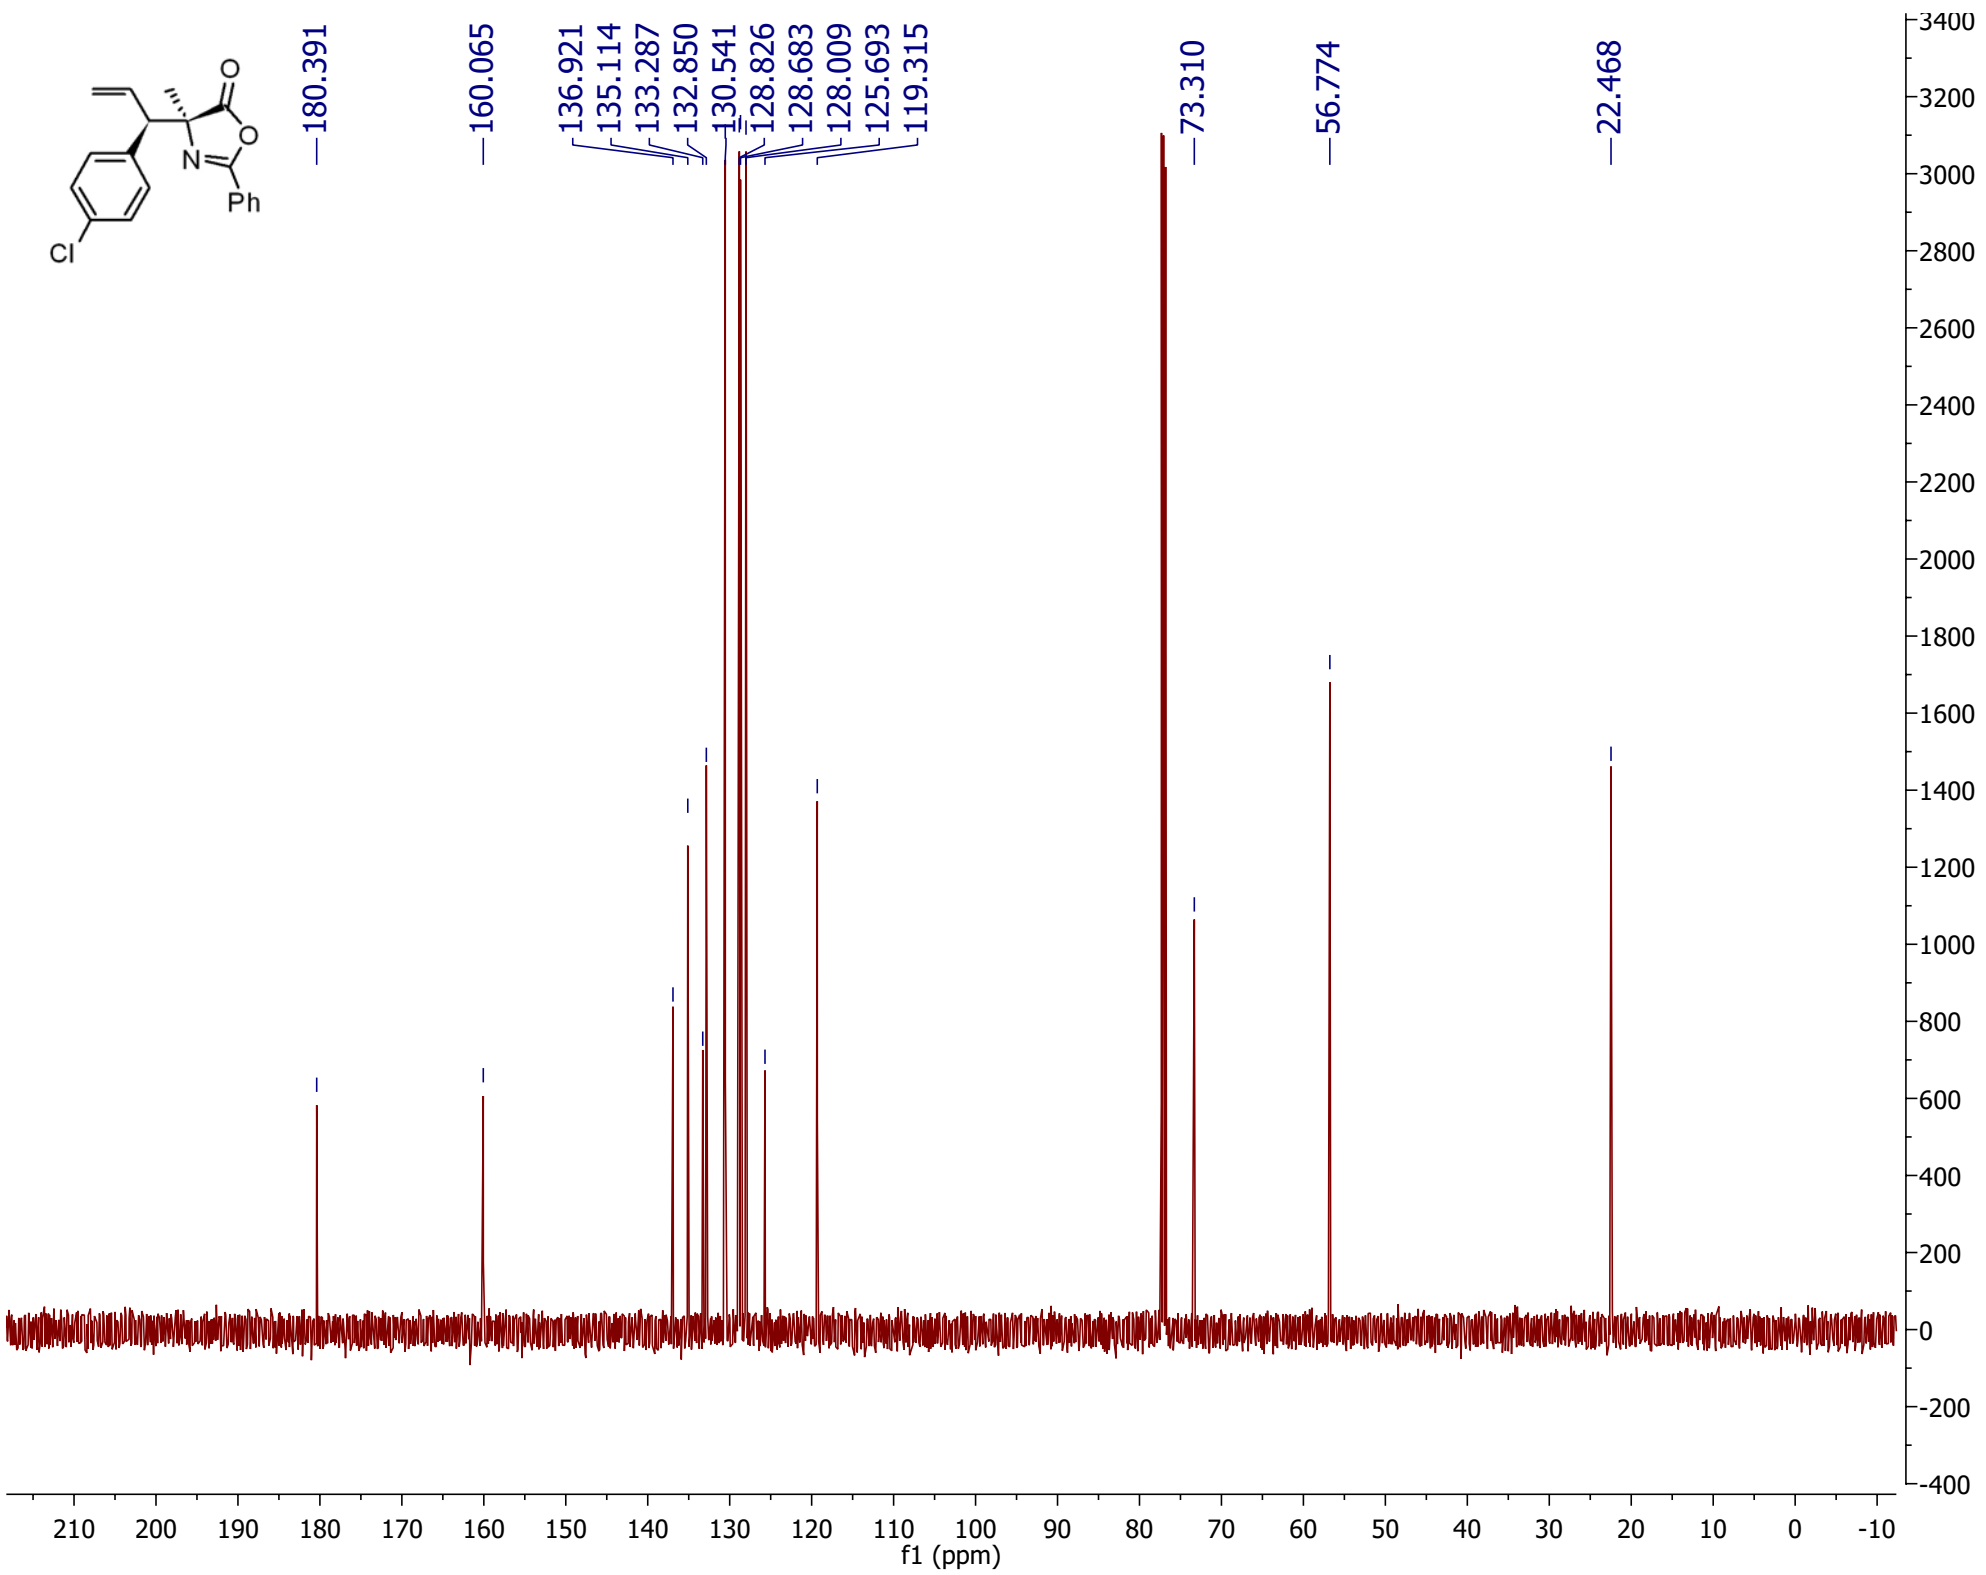

S28



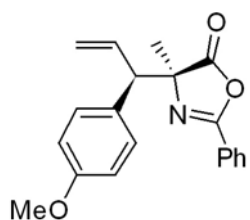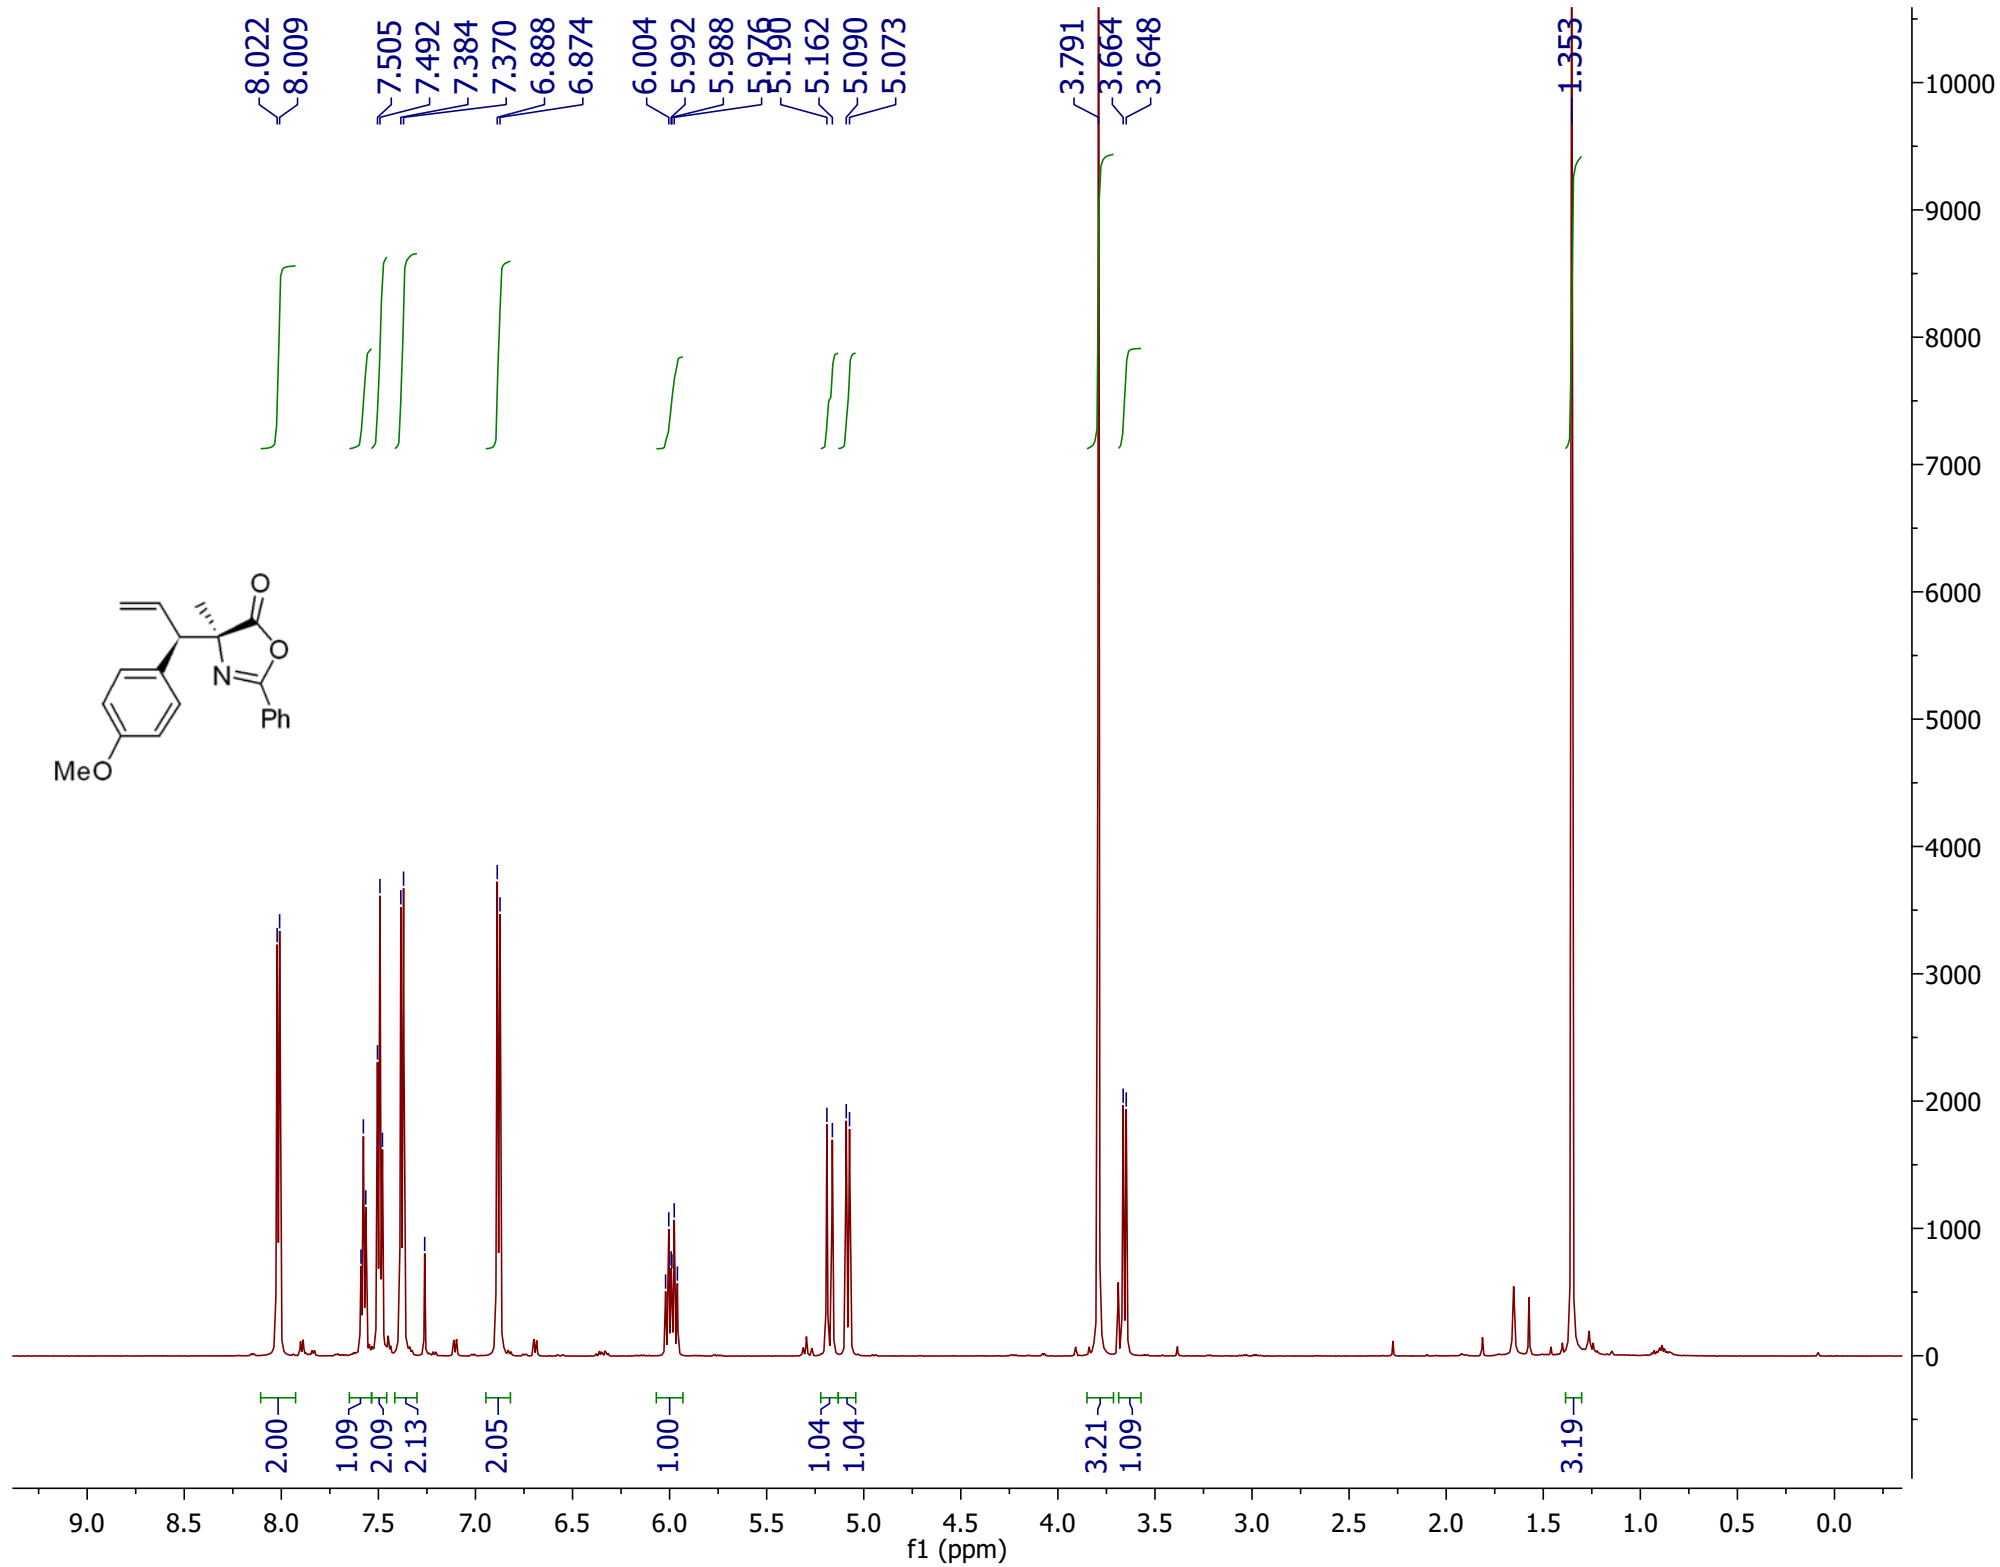

S30

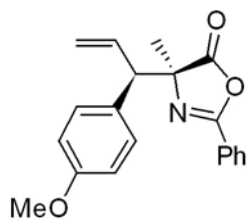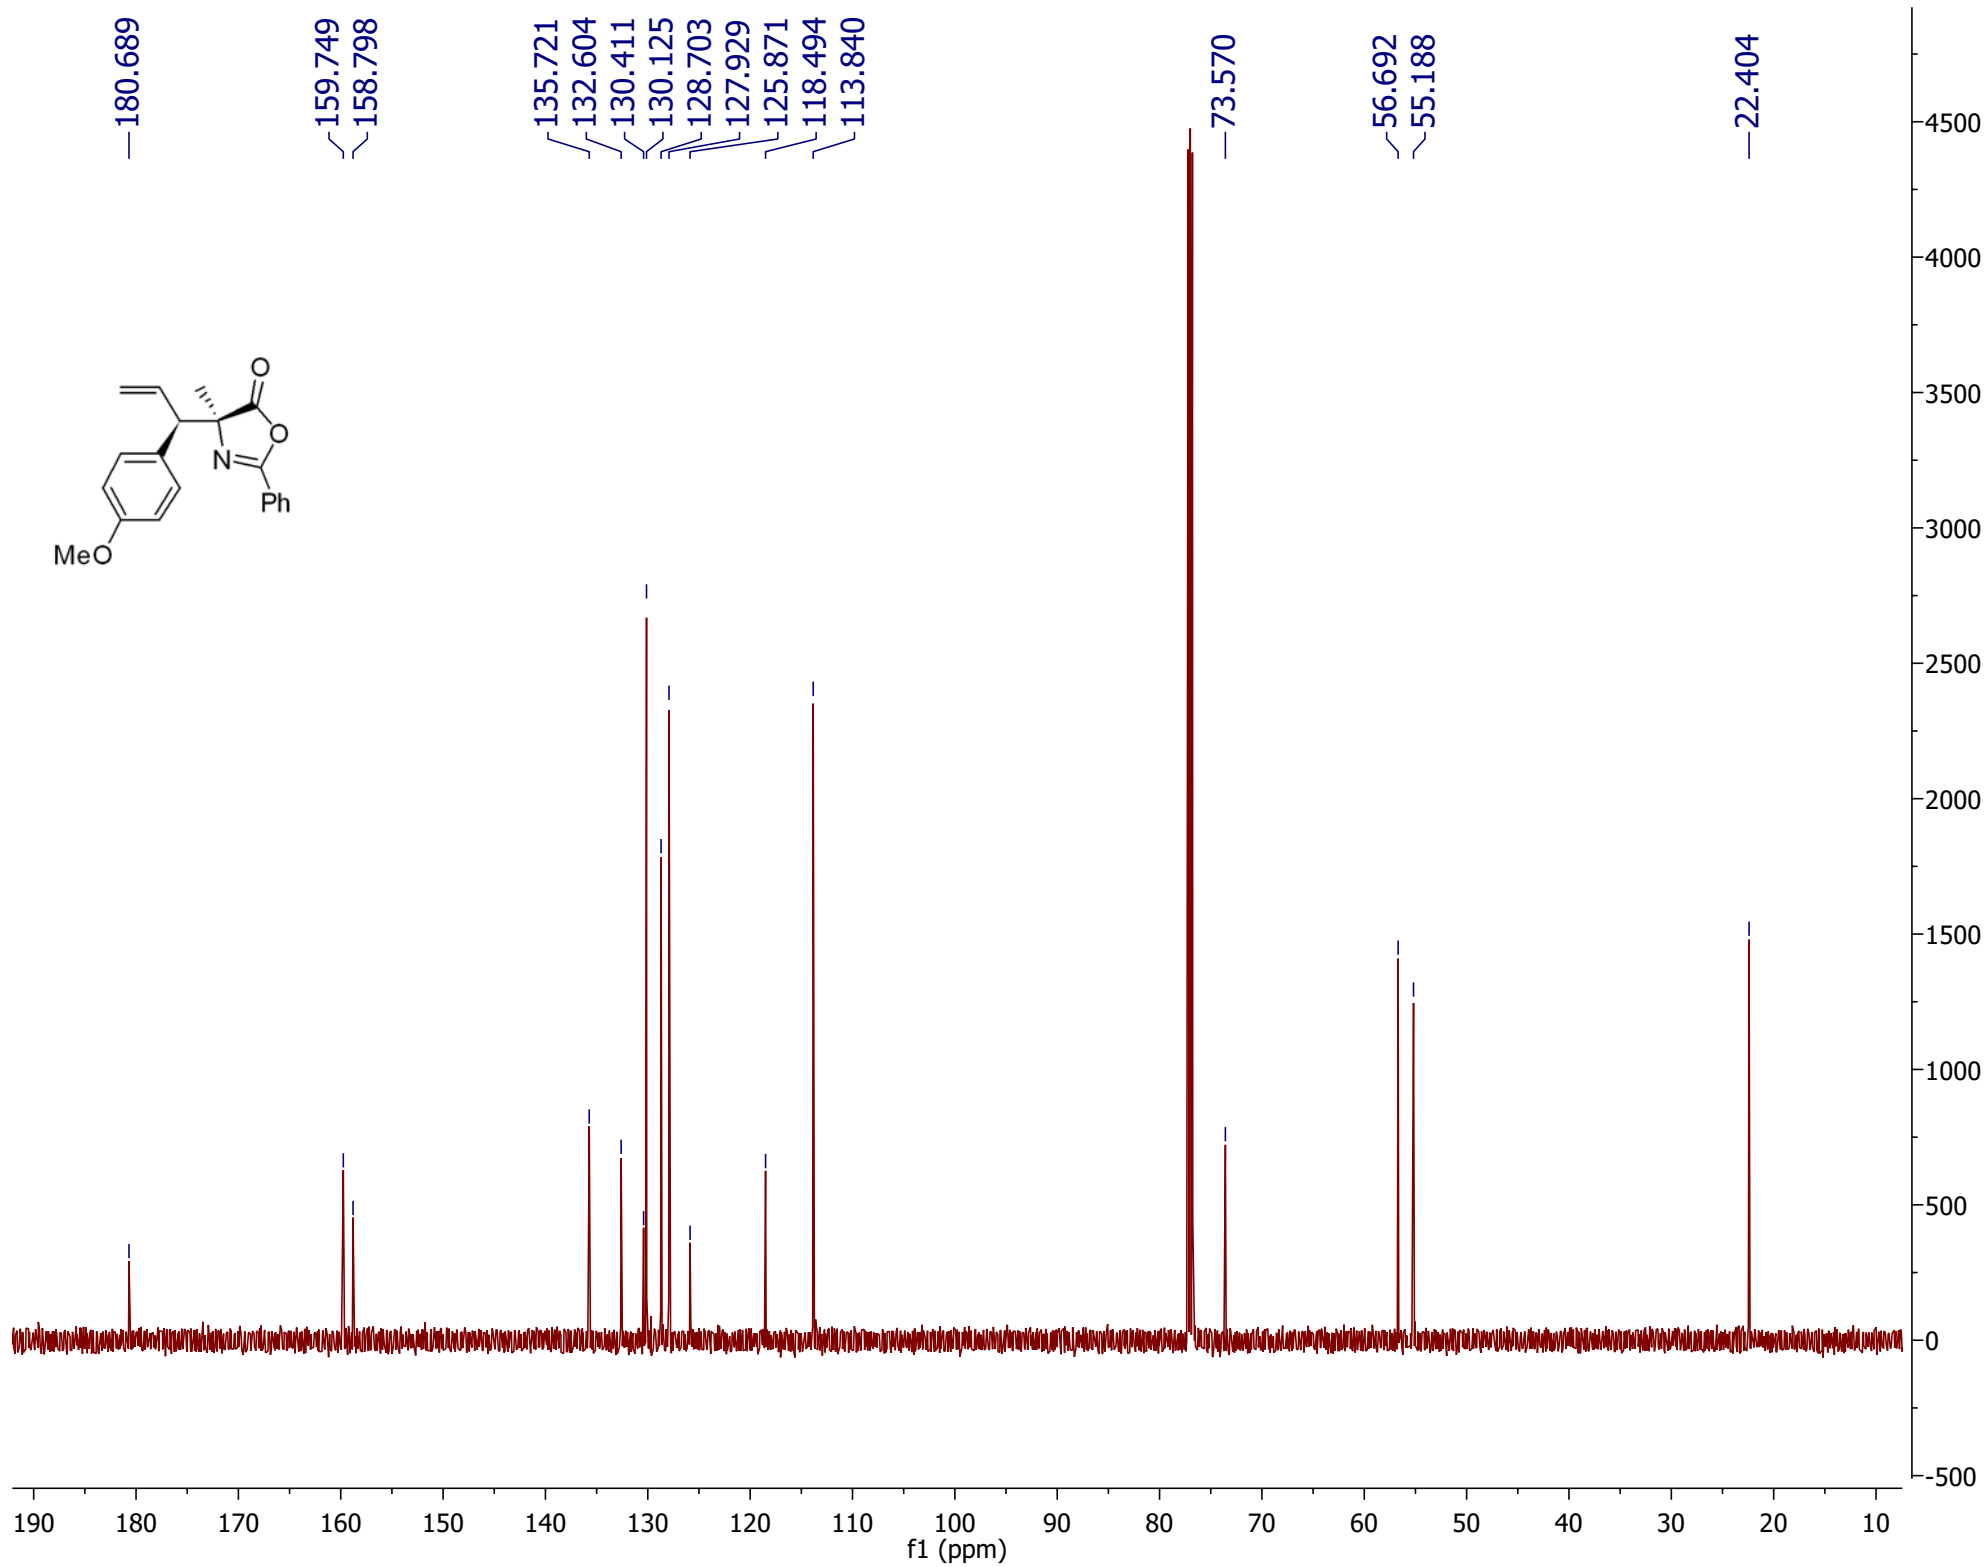

S31

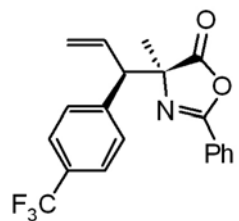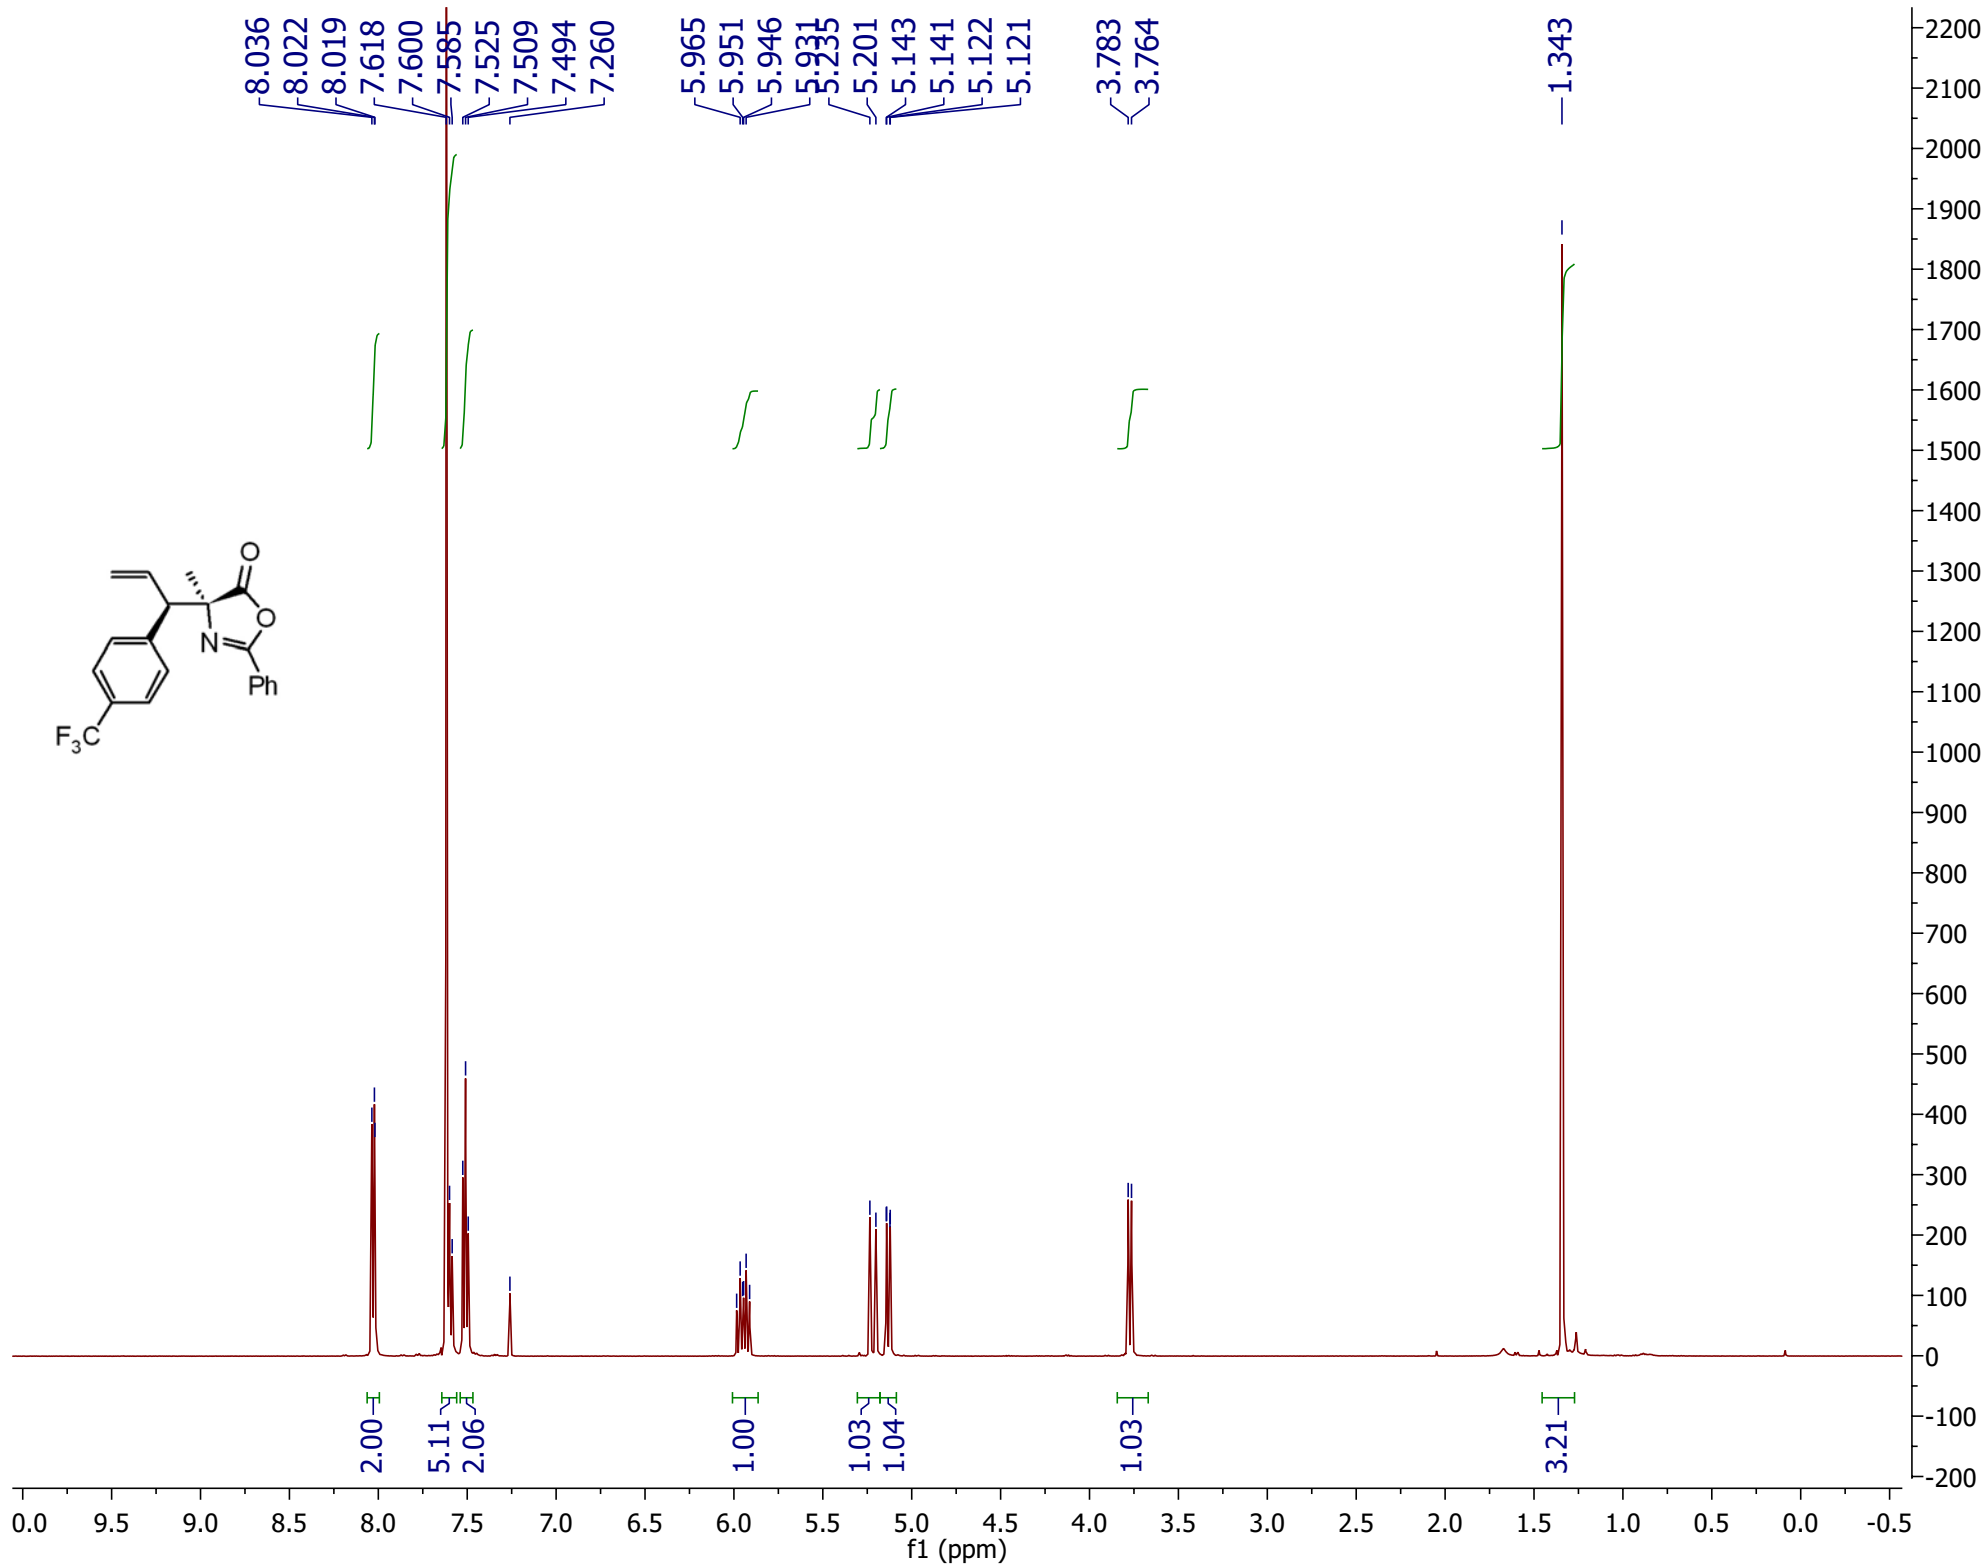

S32



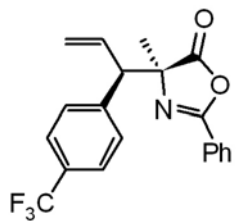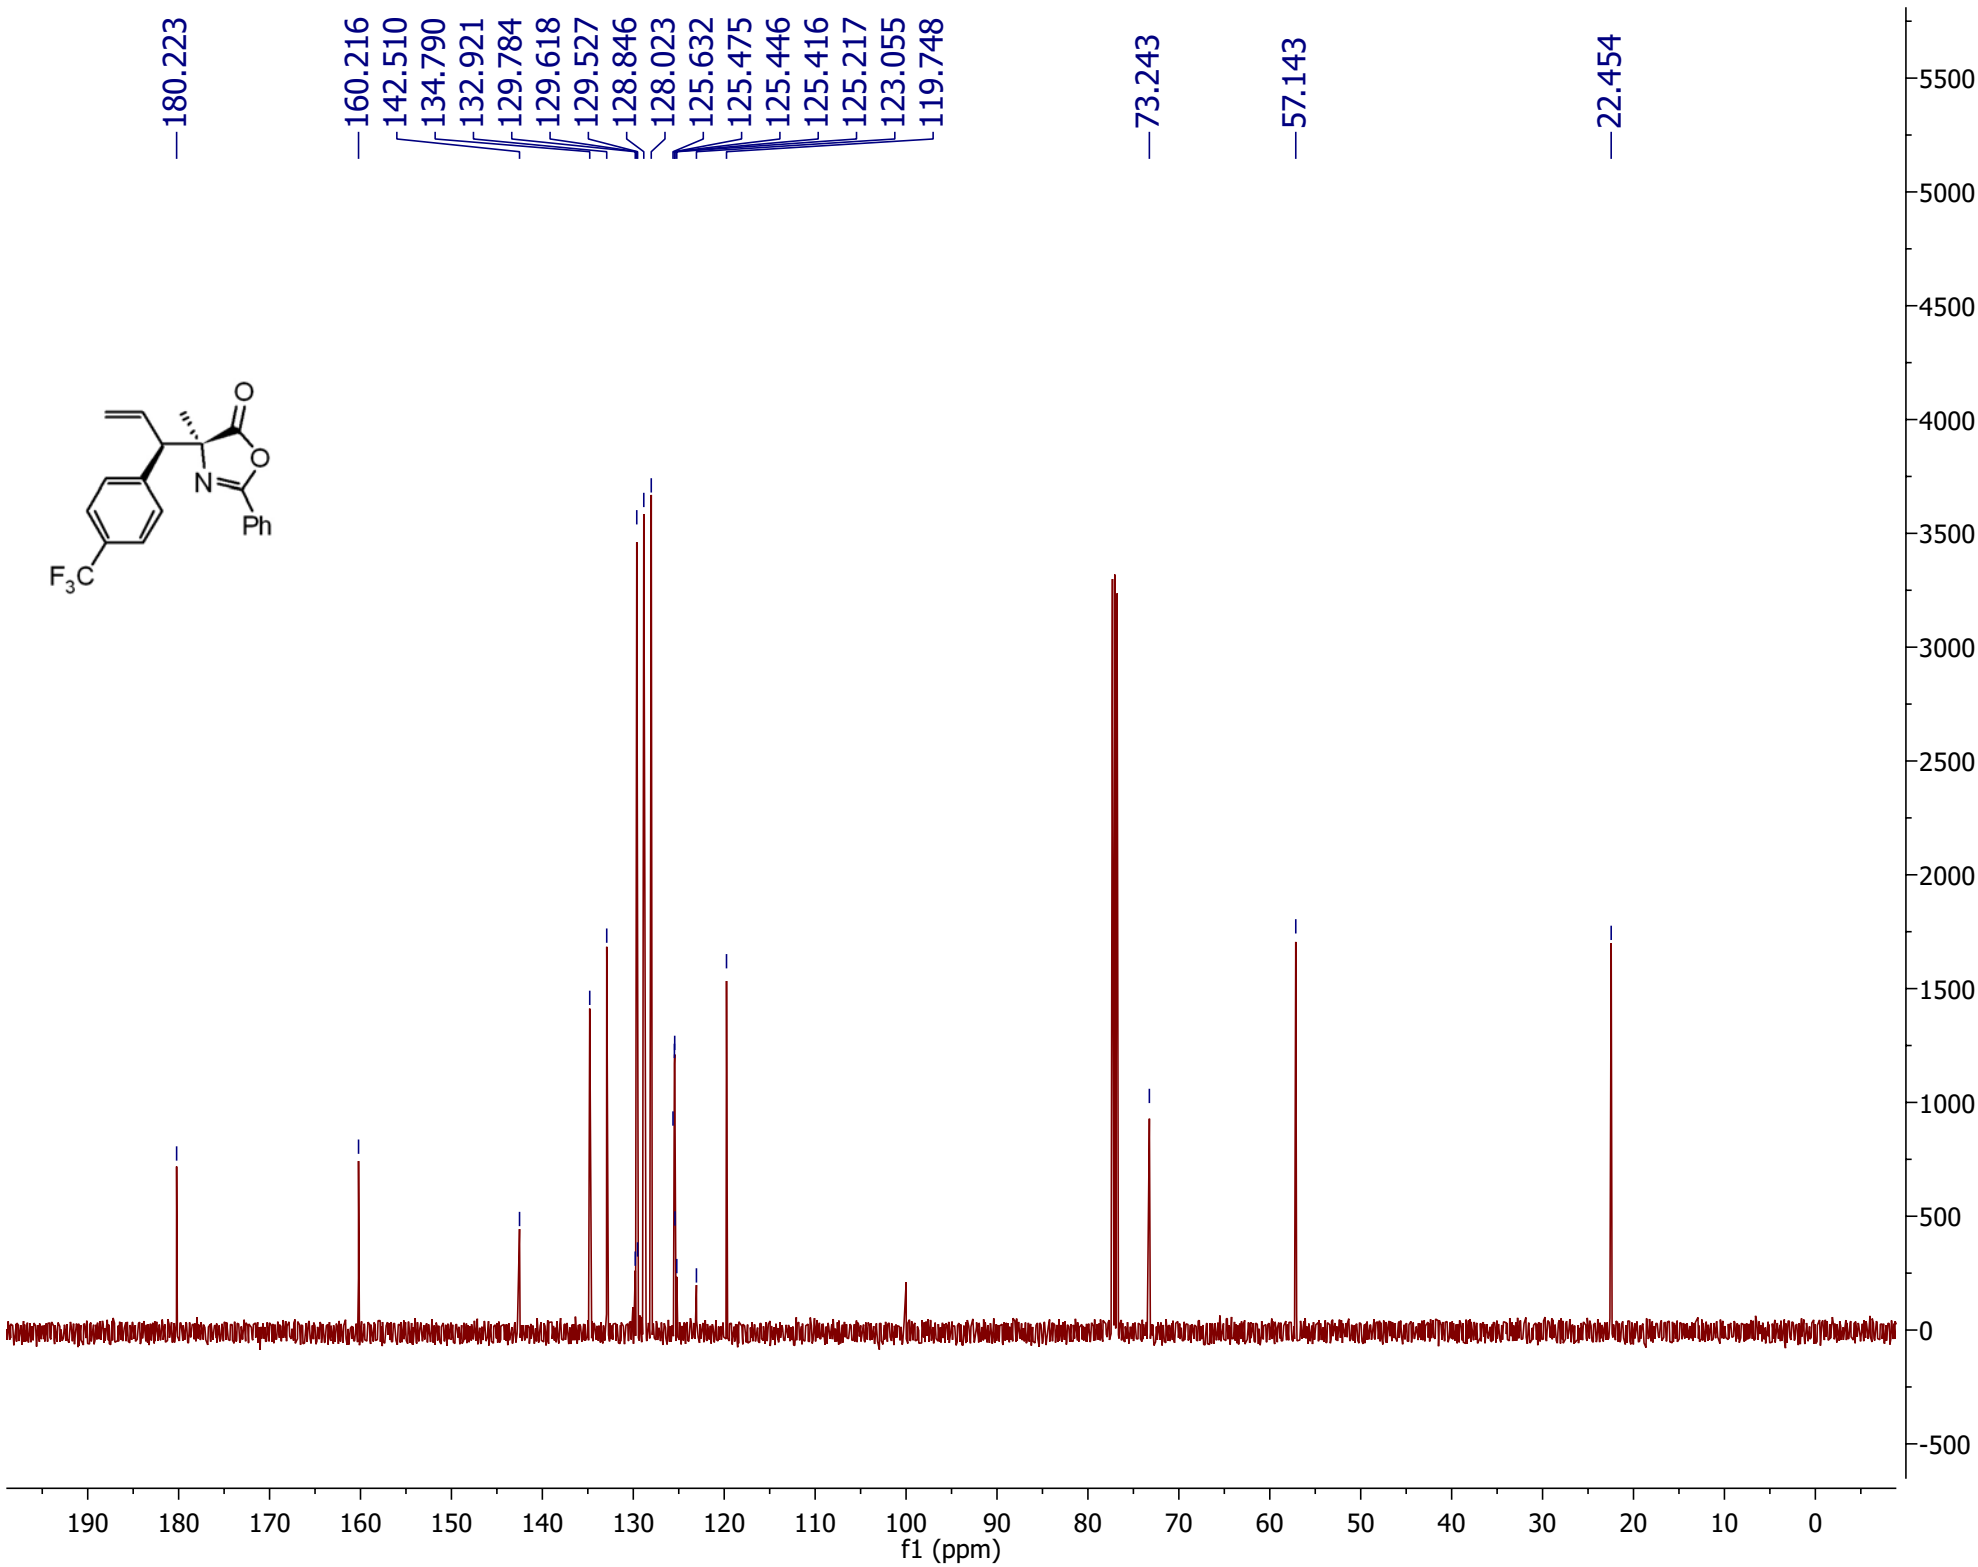

S33

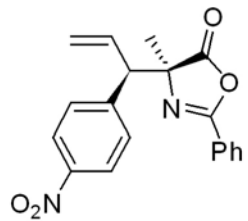

crude NMR

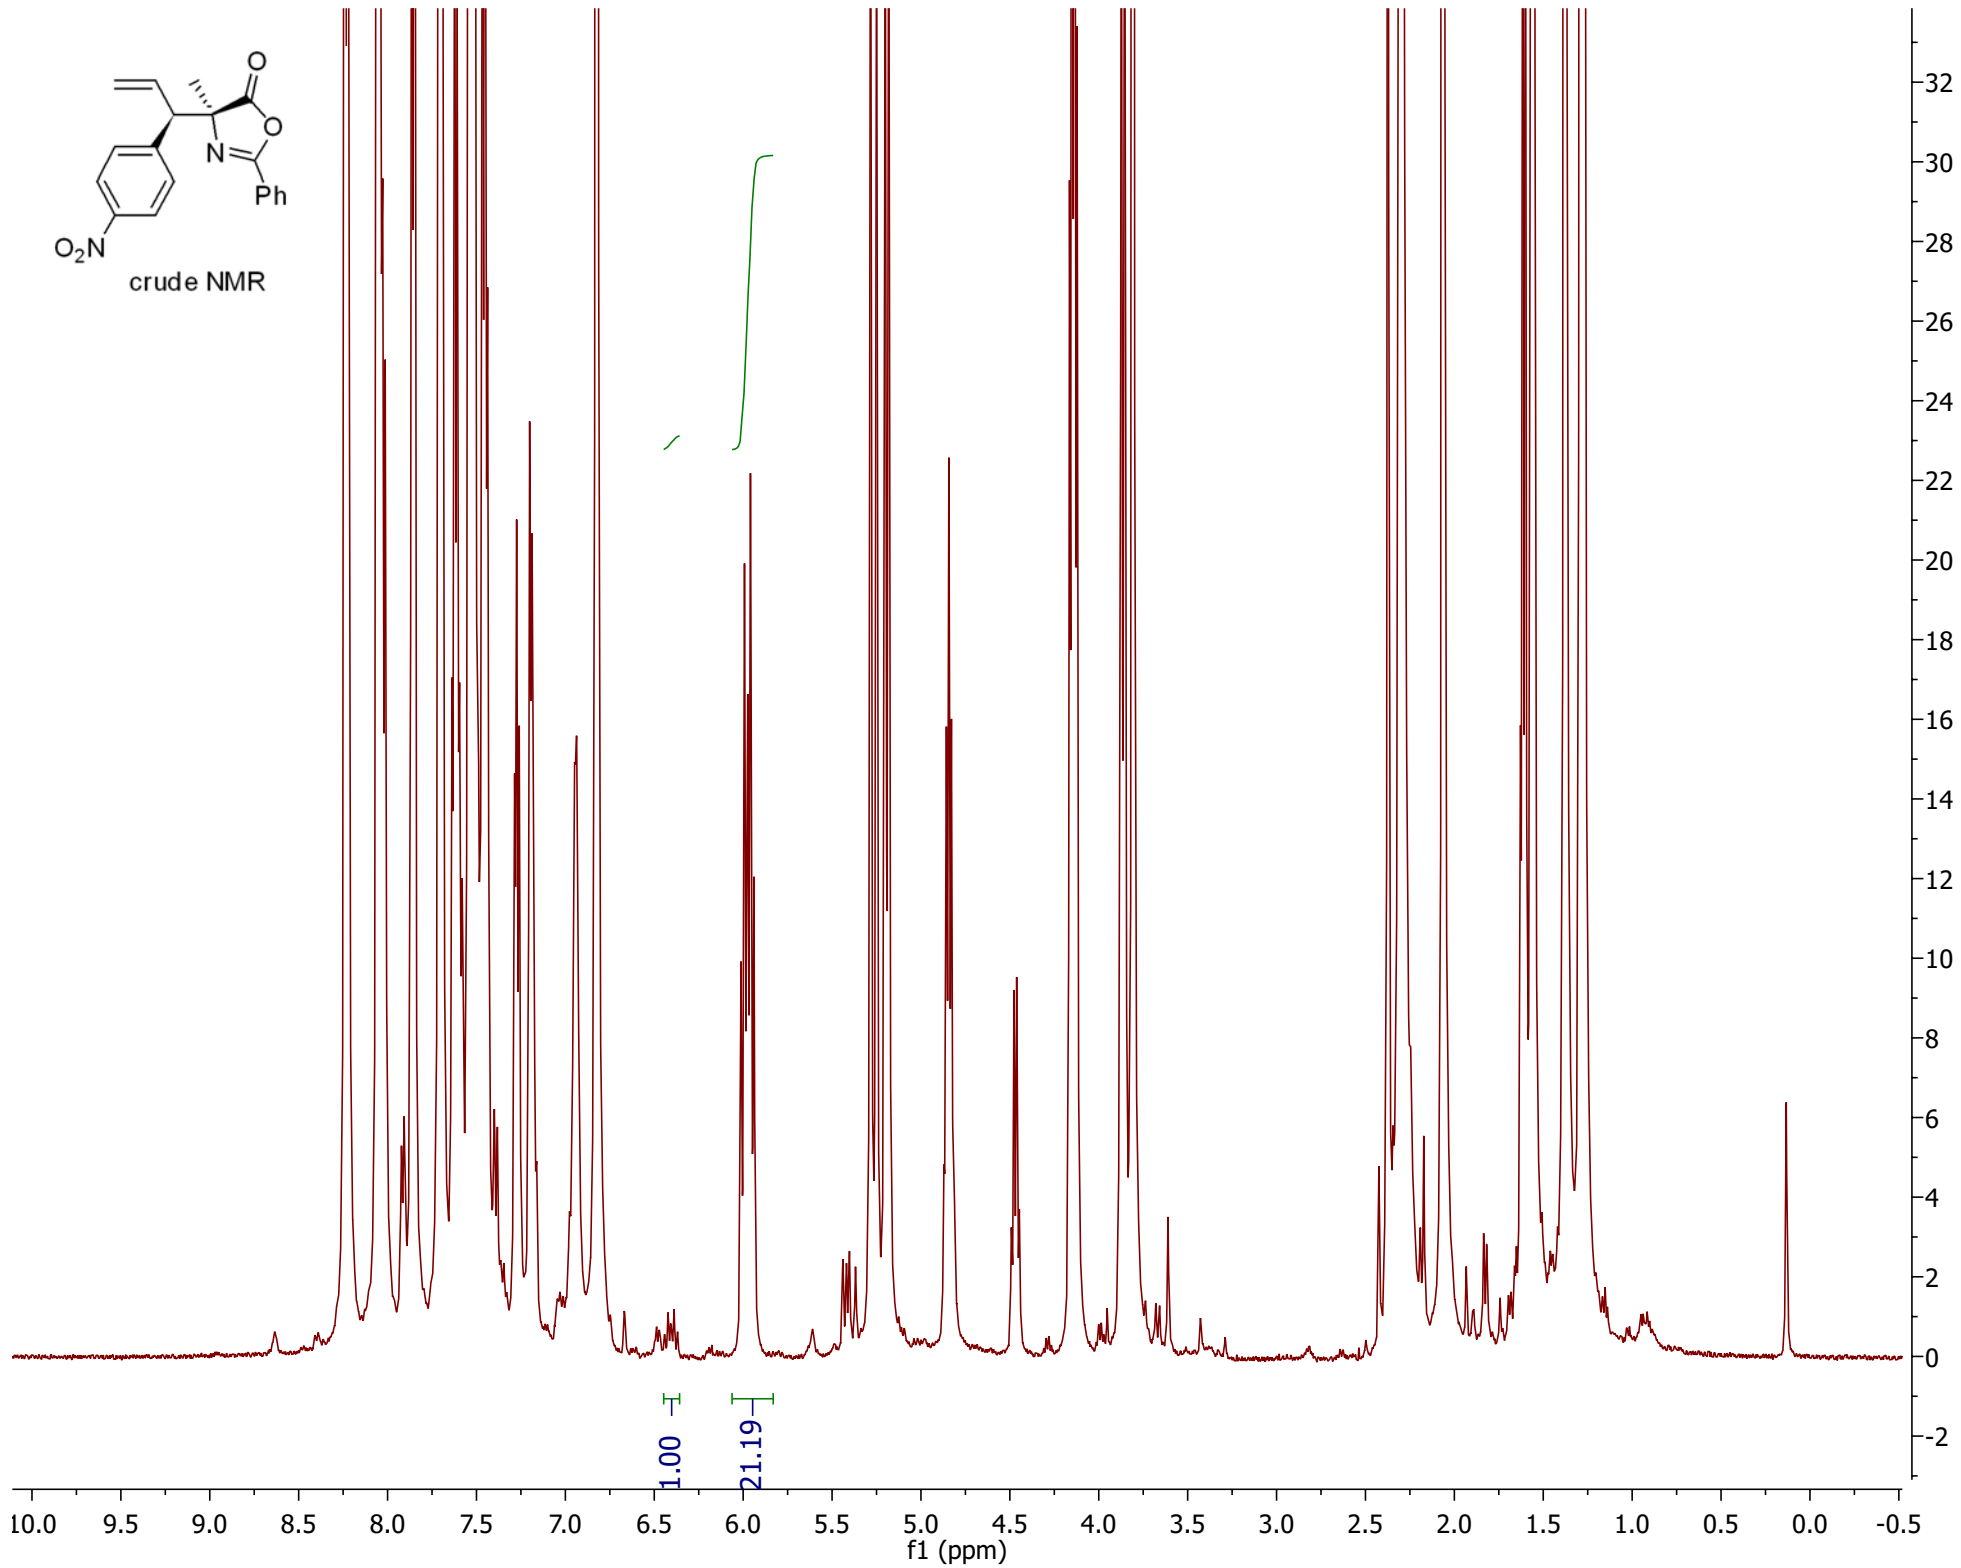

S34

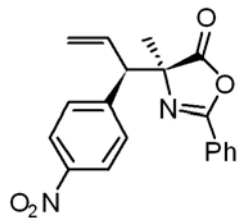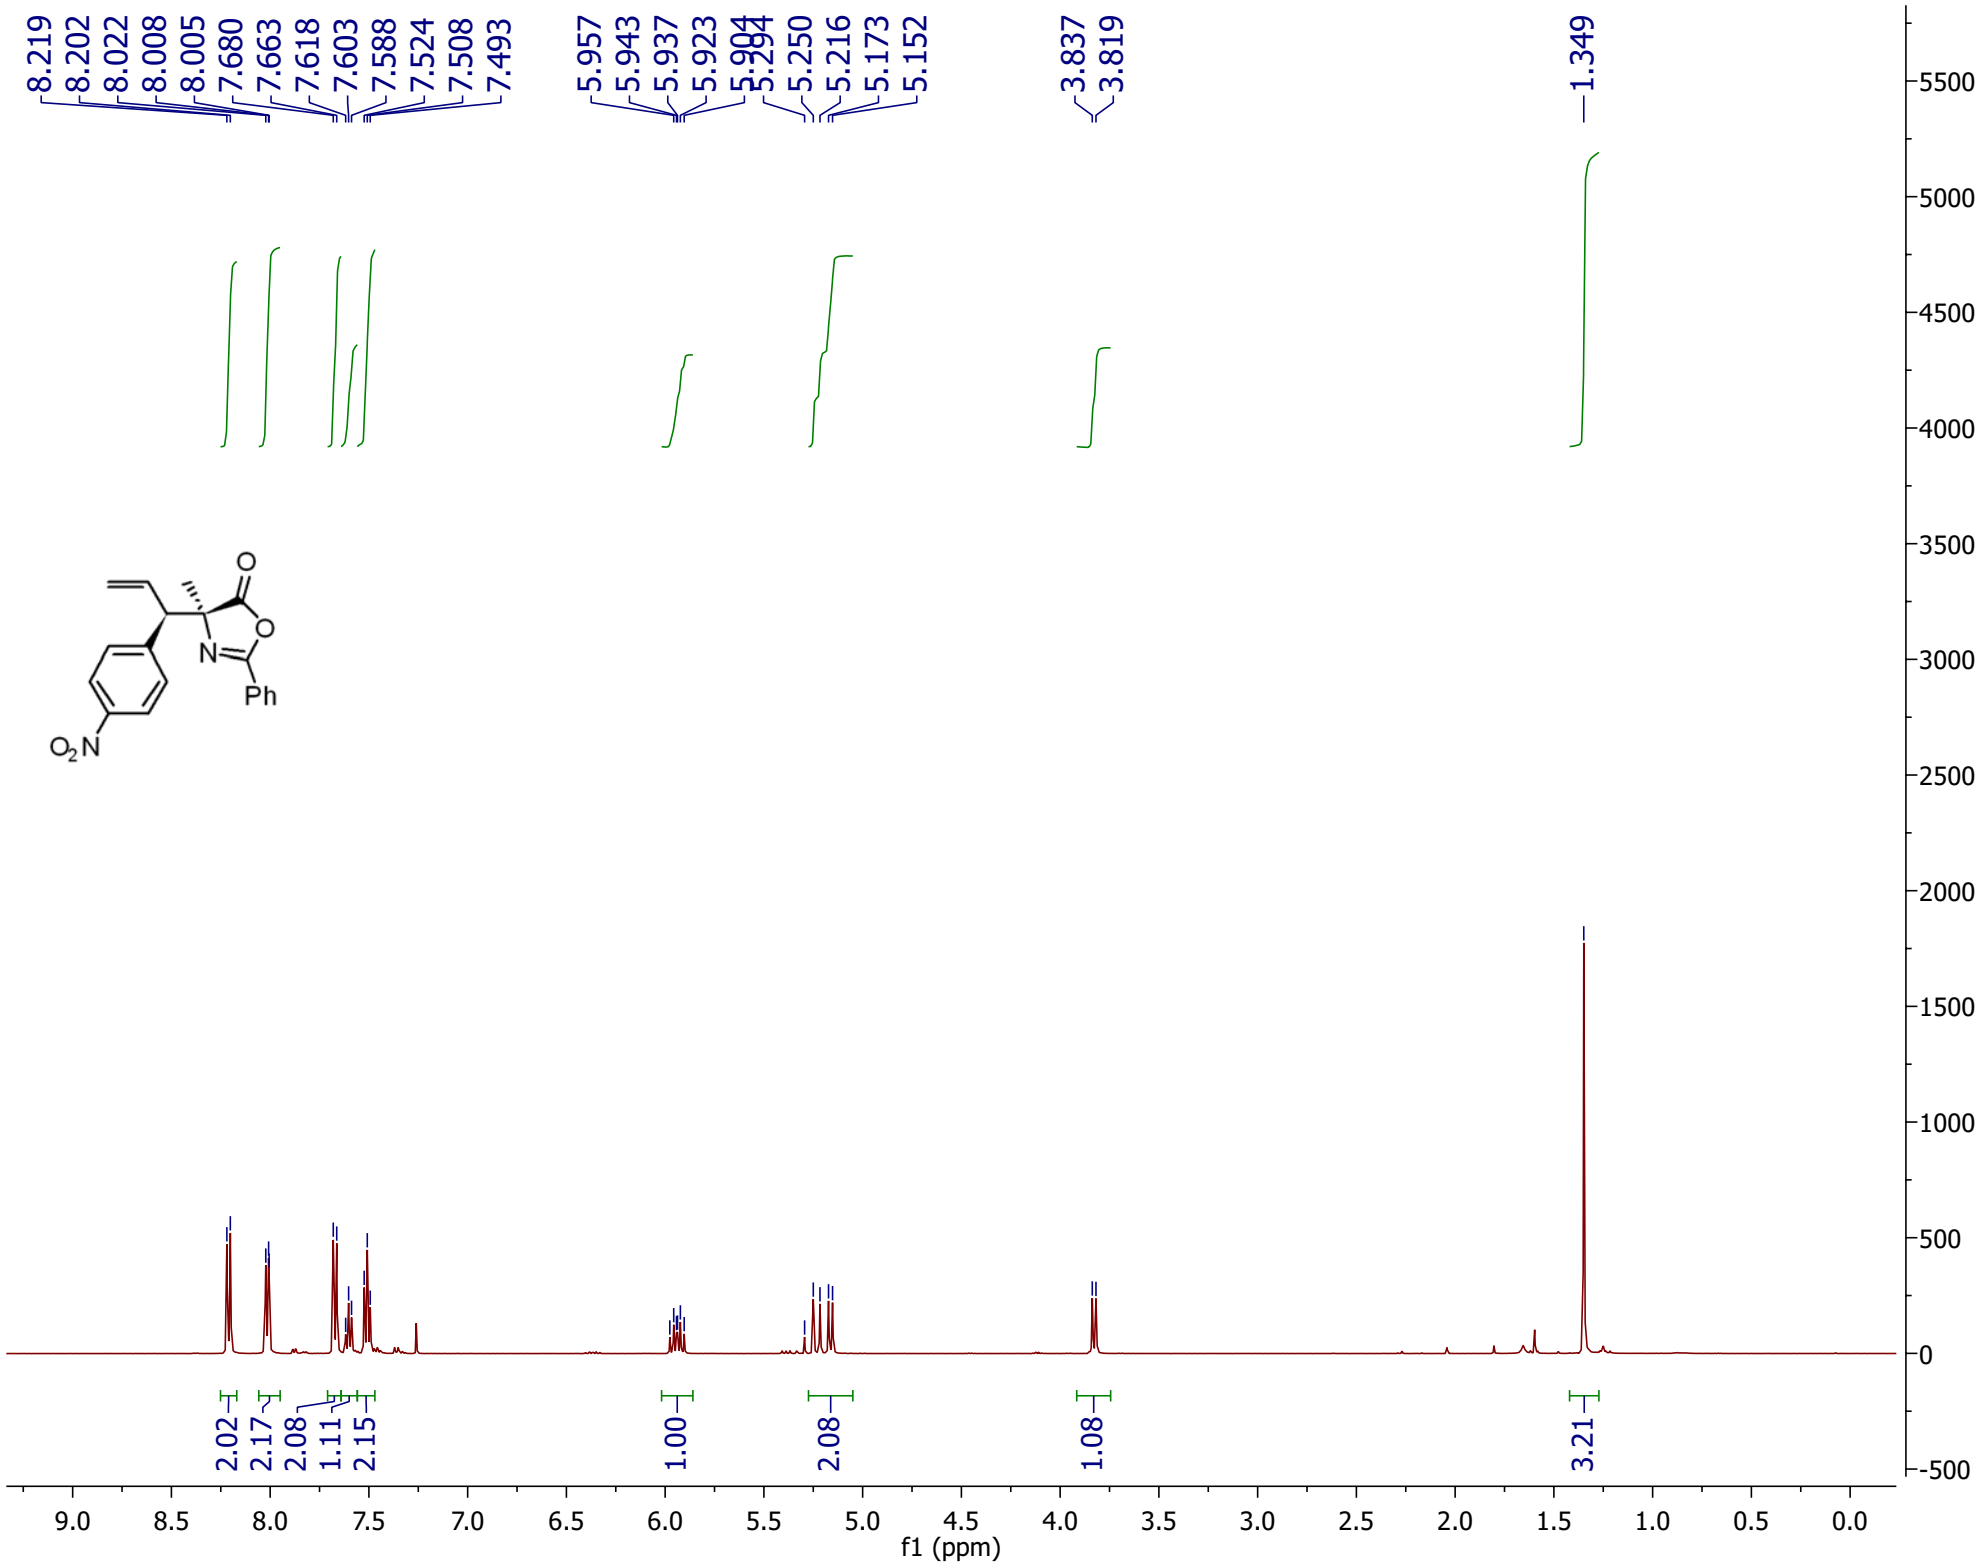

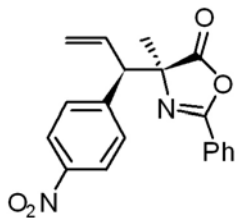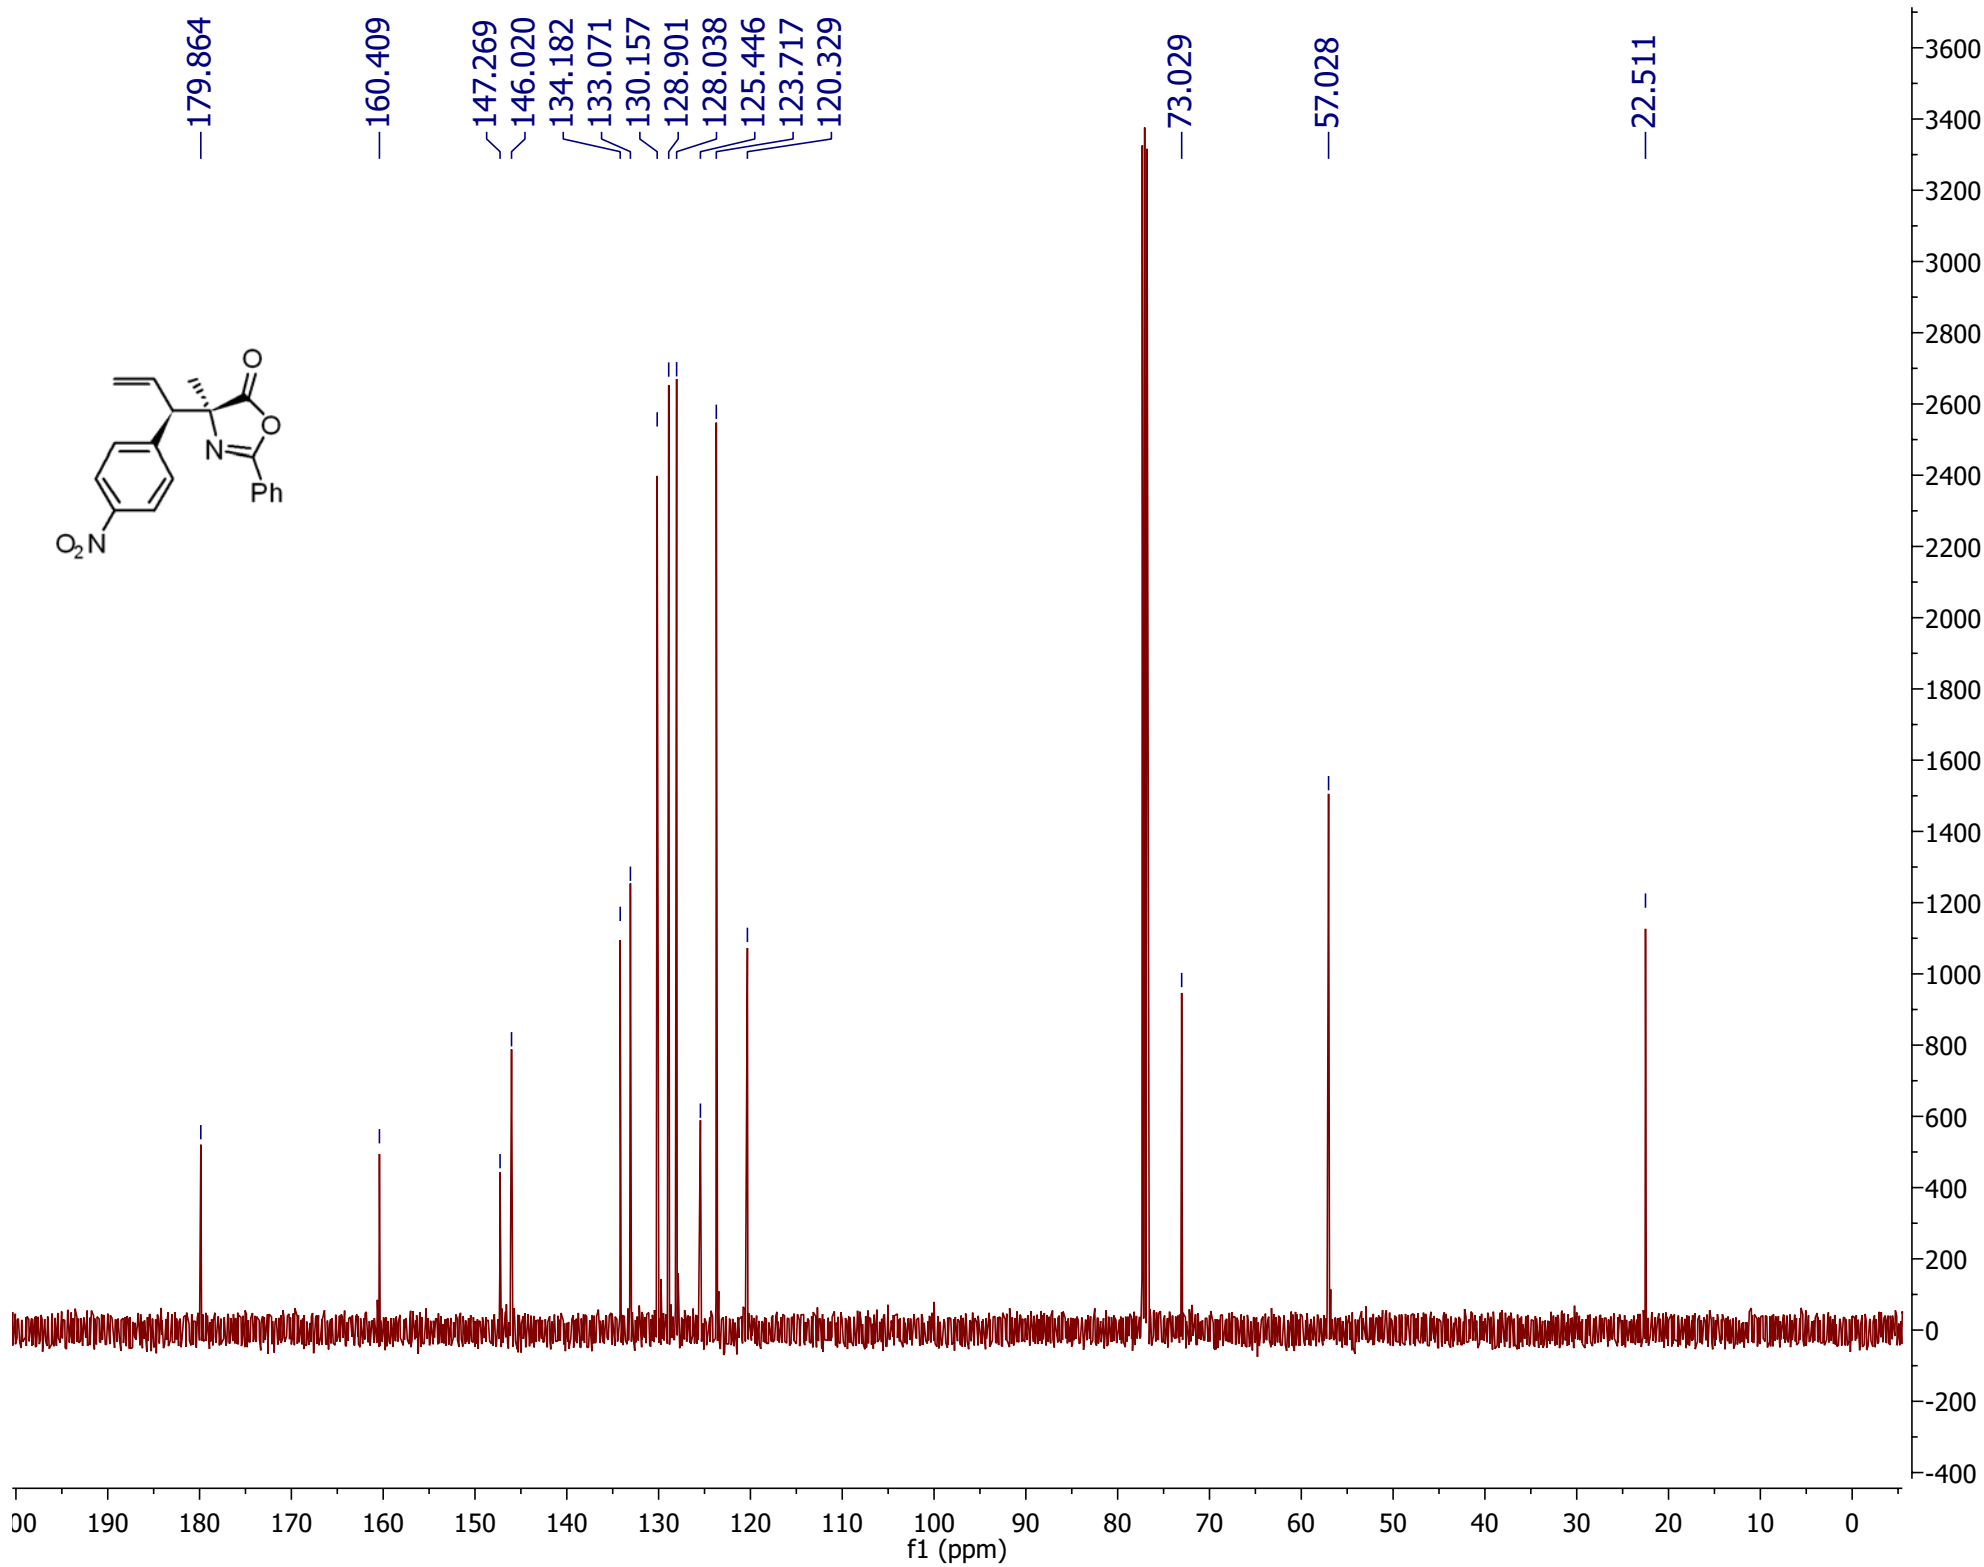

S36

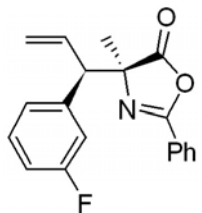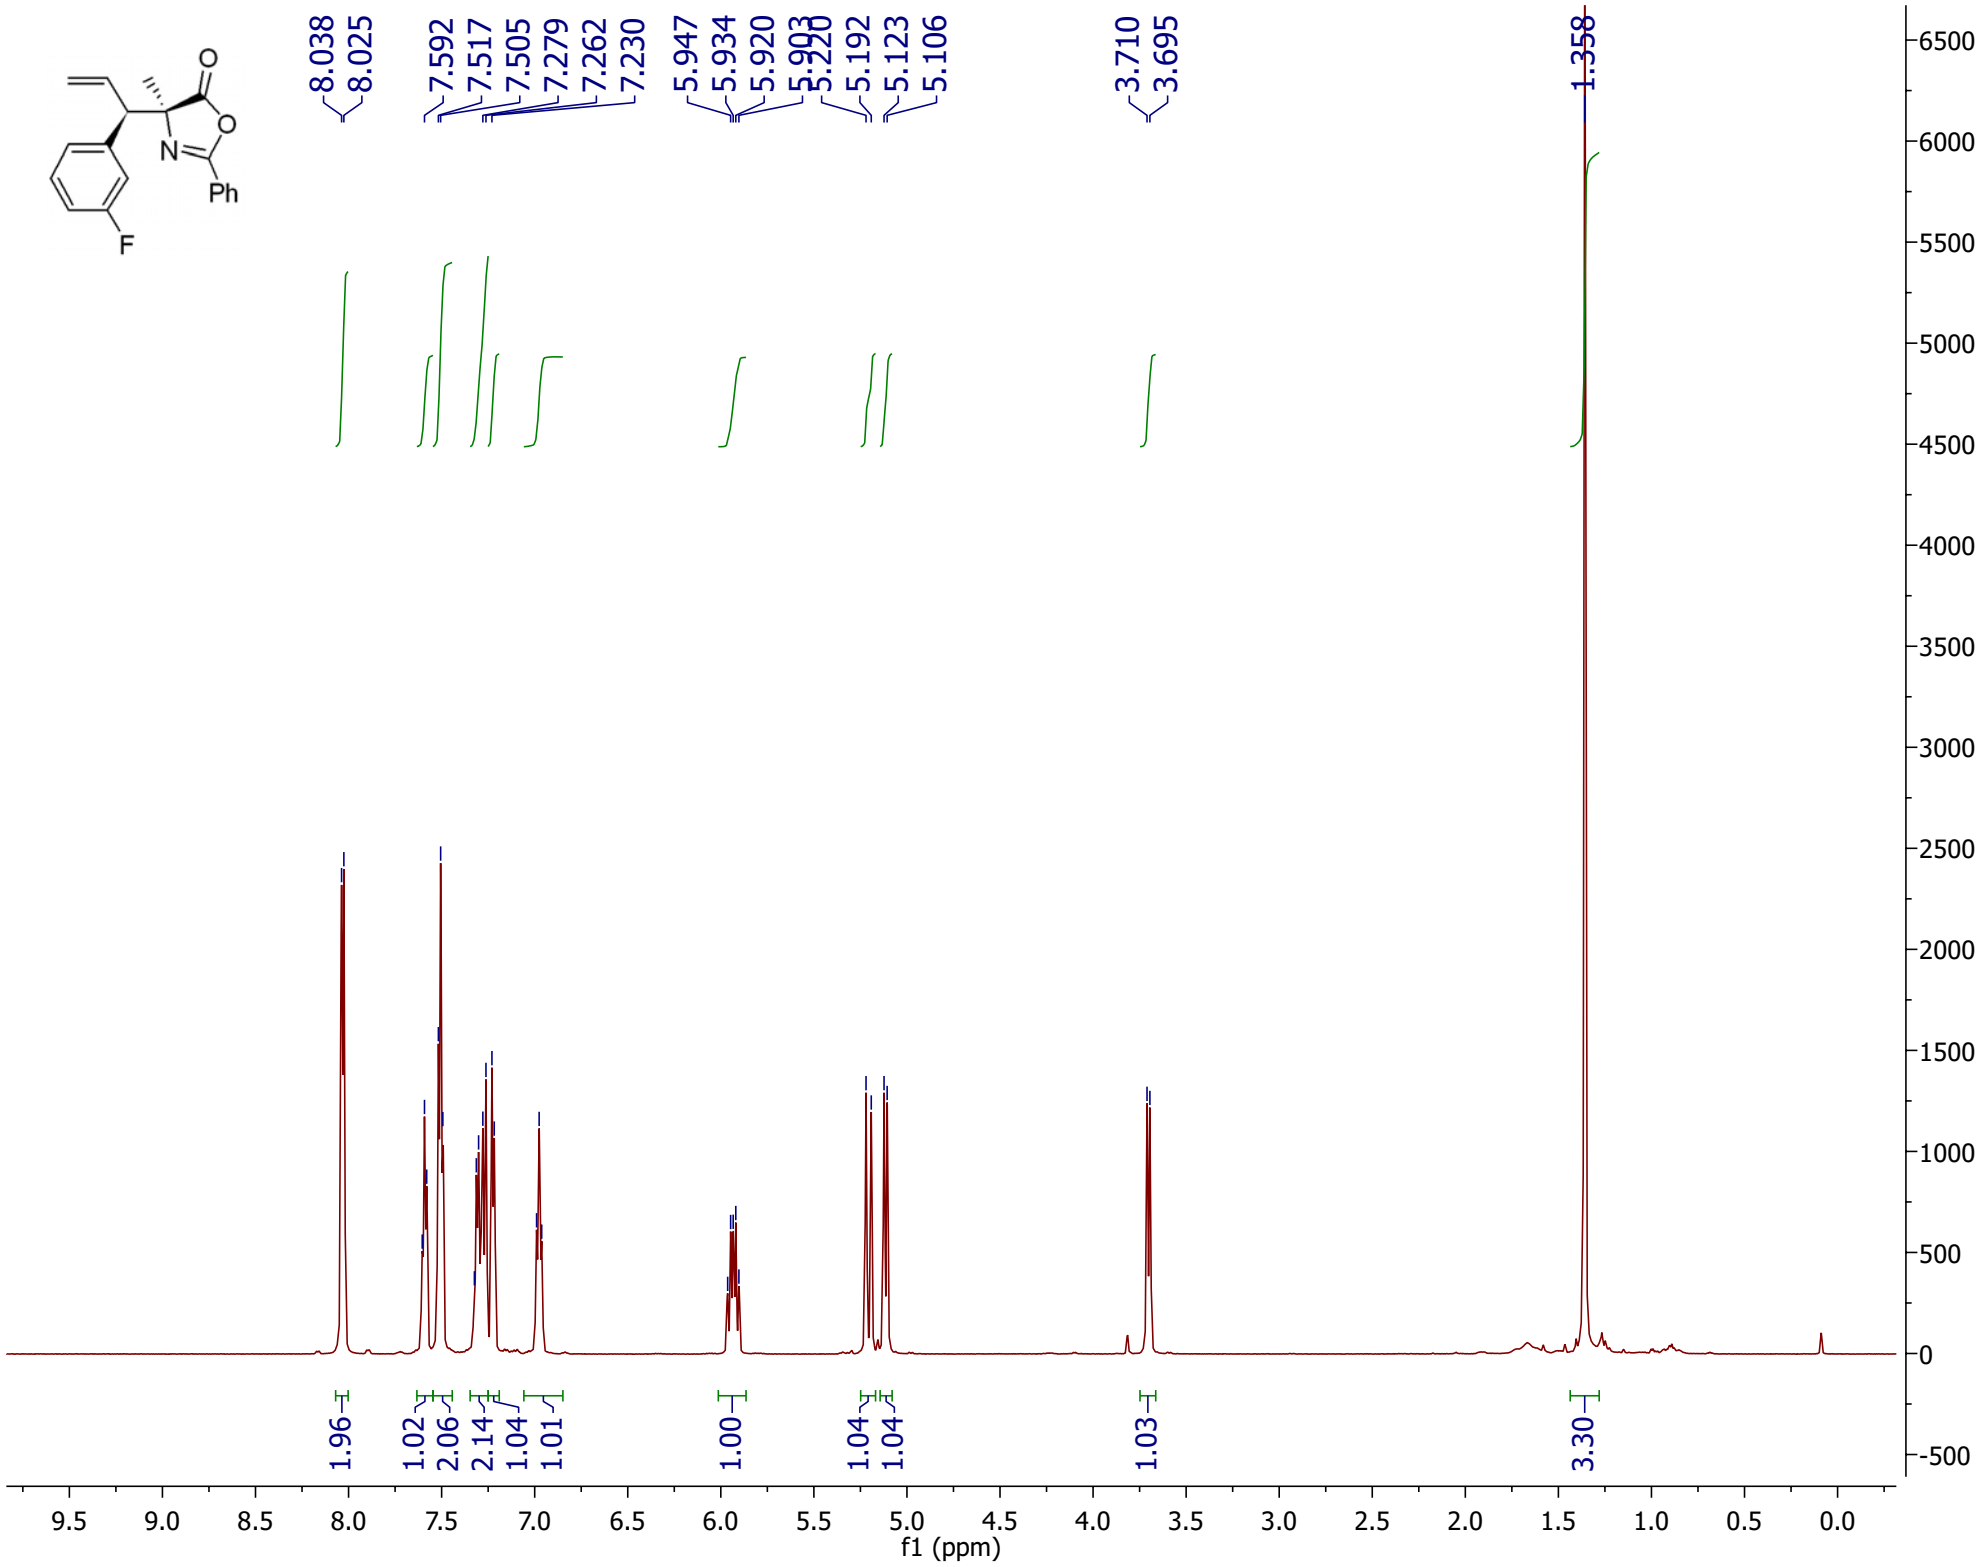

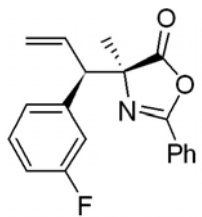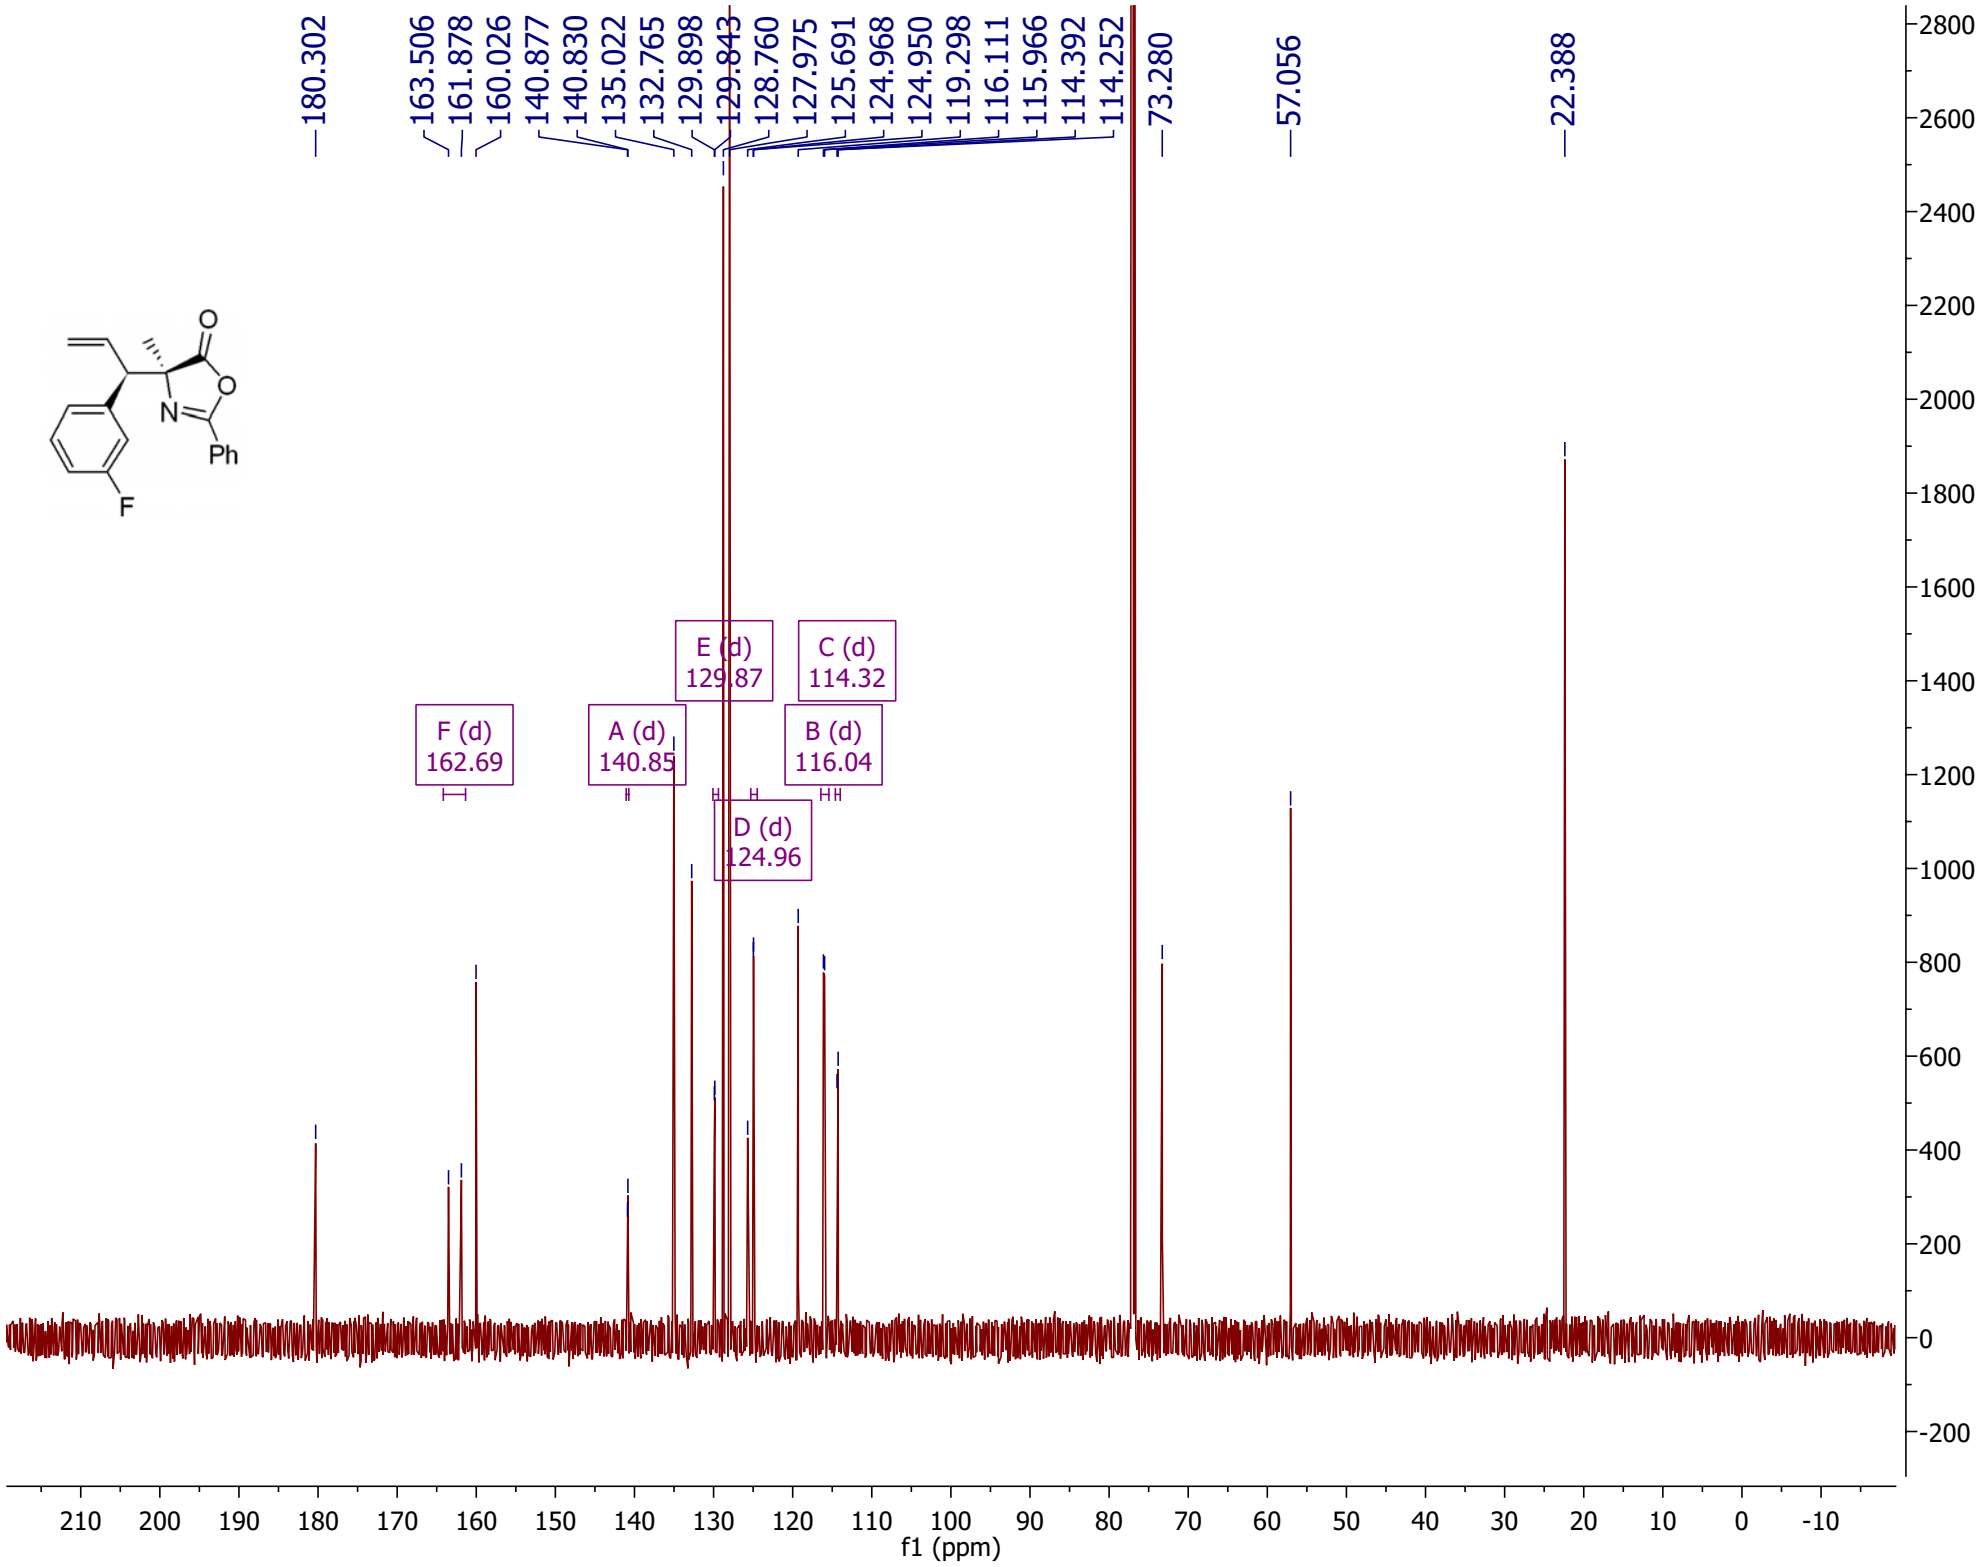

—180.302

163.506

161.878

160.026

140.877

140.830

135.022

132.765

129.898

129.843

128.760

127.975

125.691

124.968

124.950

119.298

116.111

115.966

114.392

114.252

—73.280

—57.056

—22.388

F (d)  
162.69  
H

A (d)  
140.85  
H

E (d)  
129.87  
H

D (d)  
124.96  
H

C (d)  
114.32  
H

B (d)  
116.04  
HH

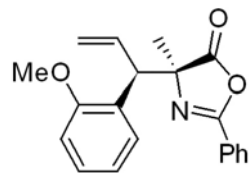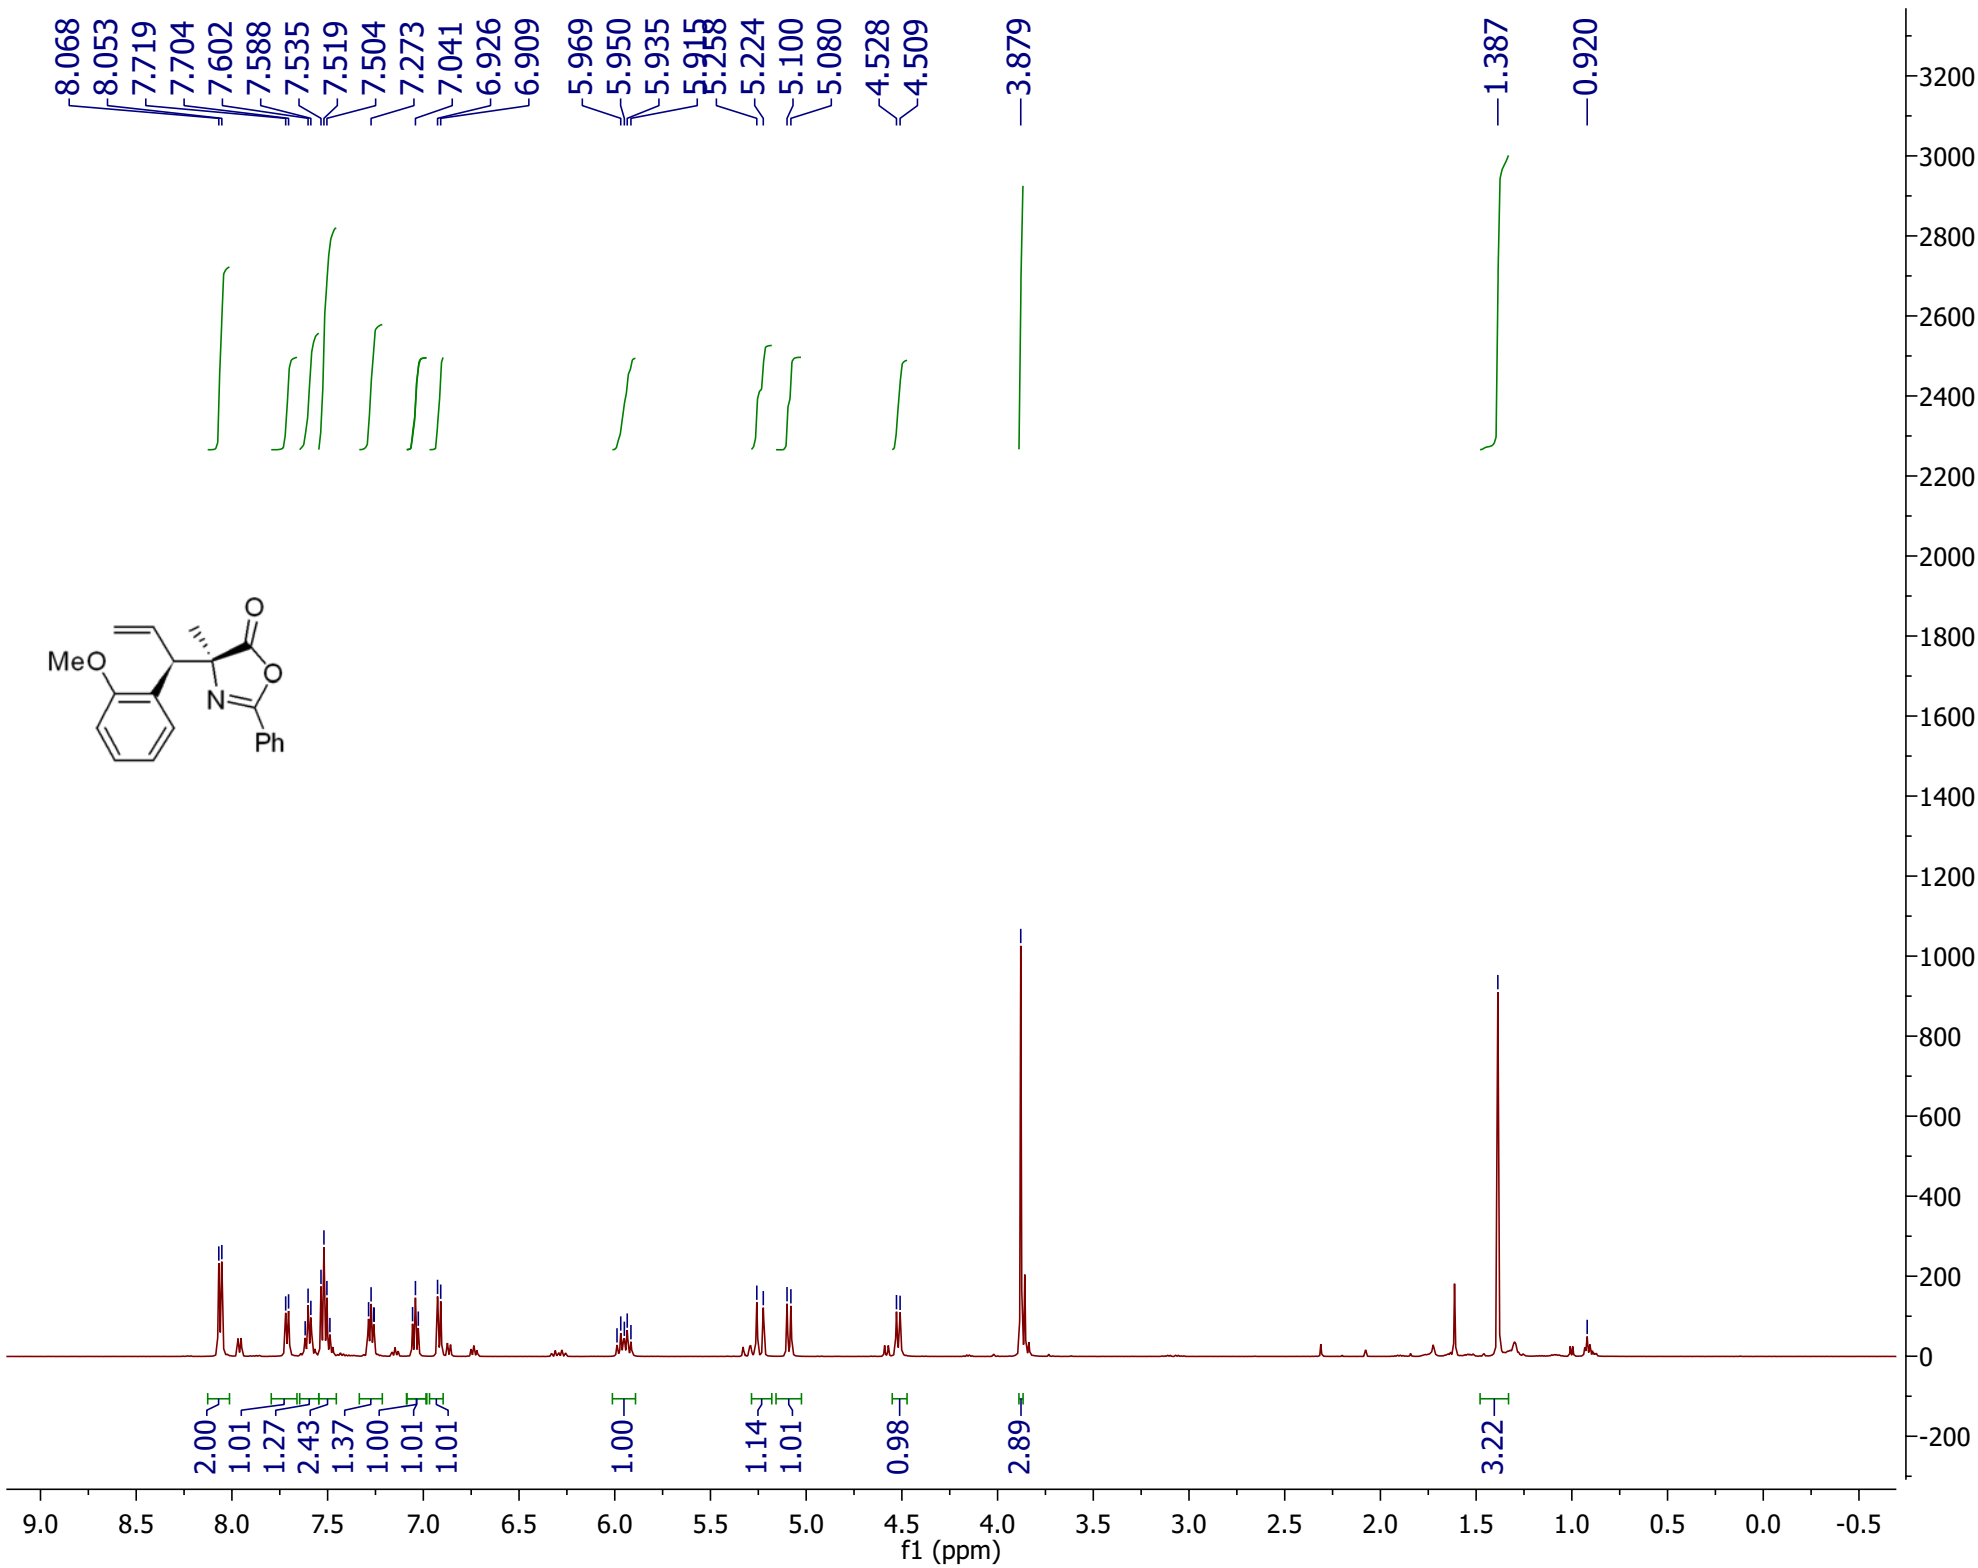

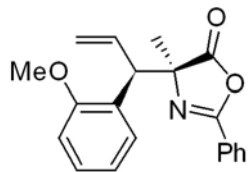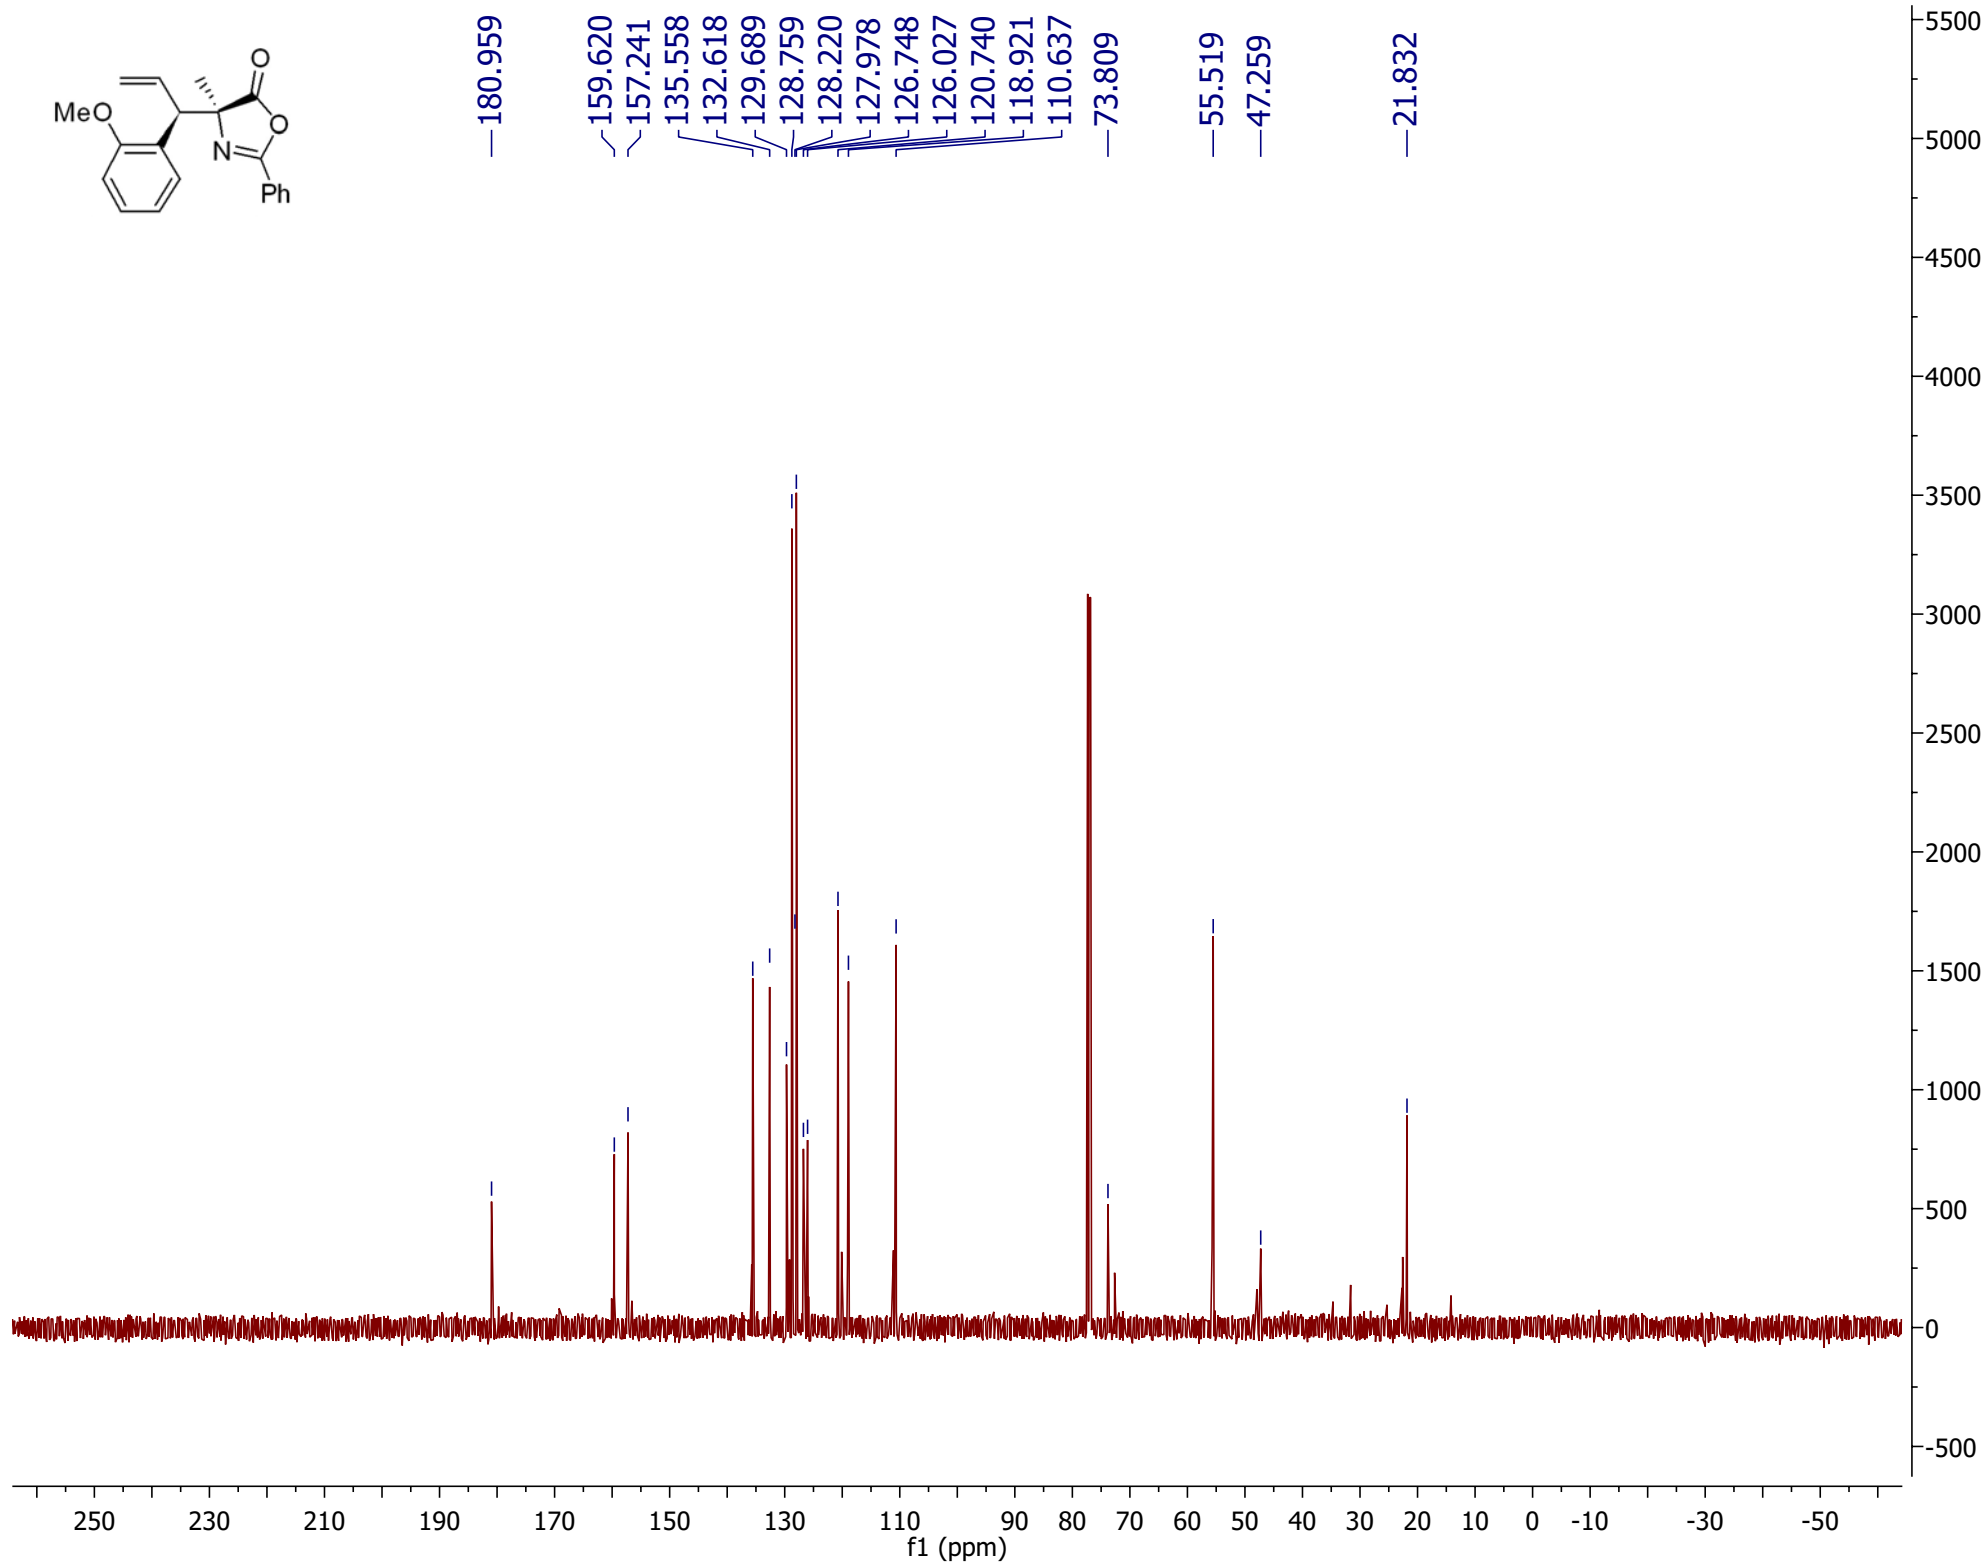



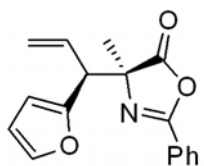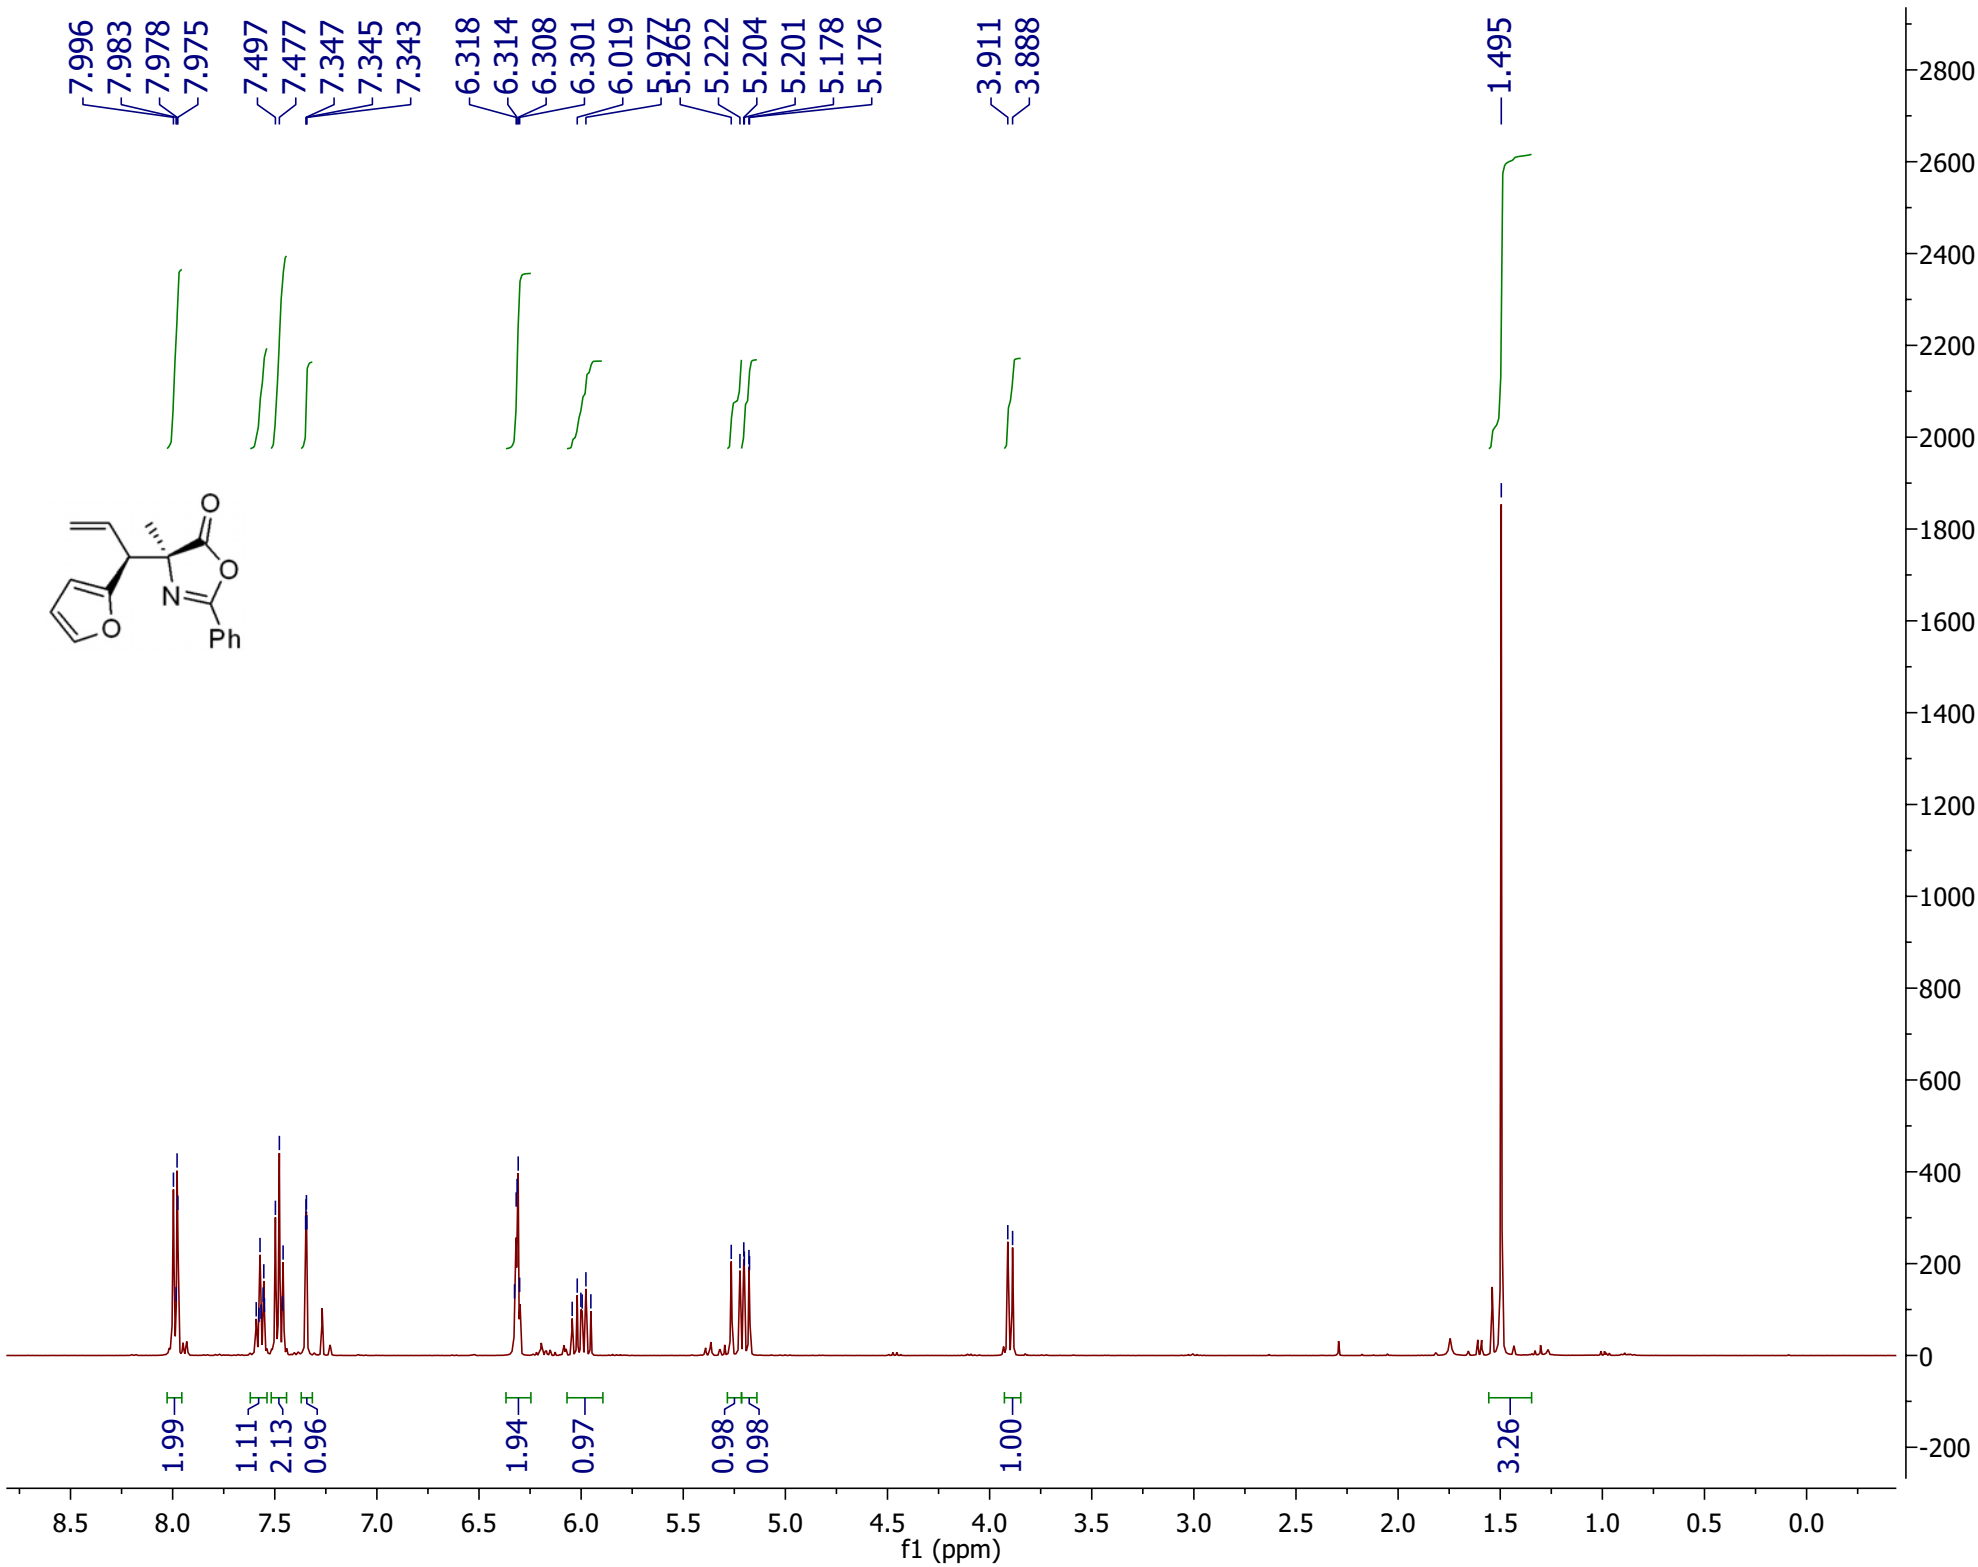

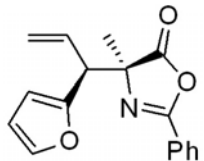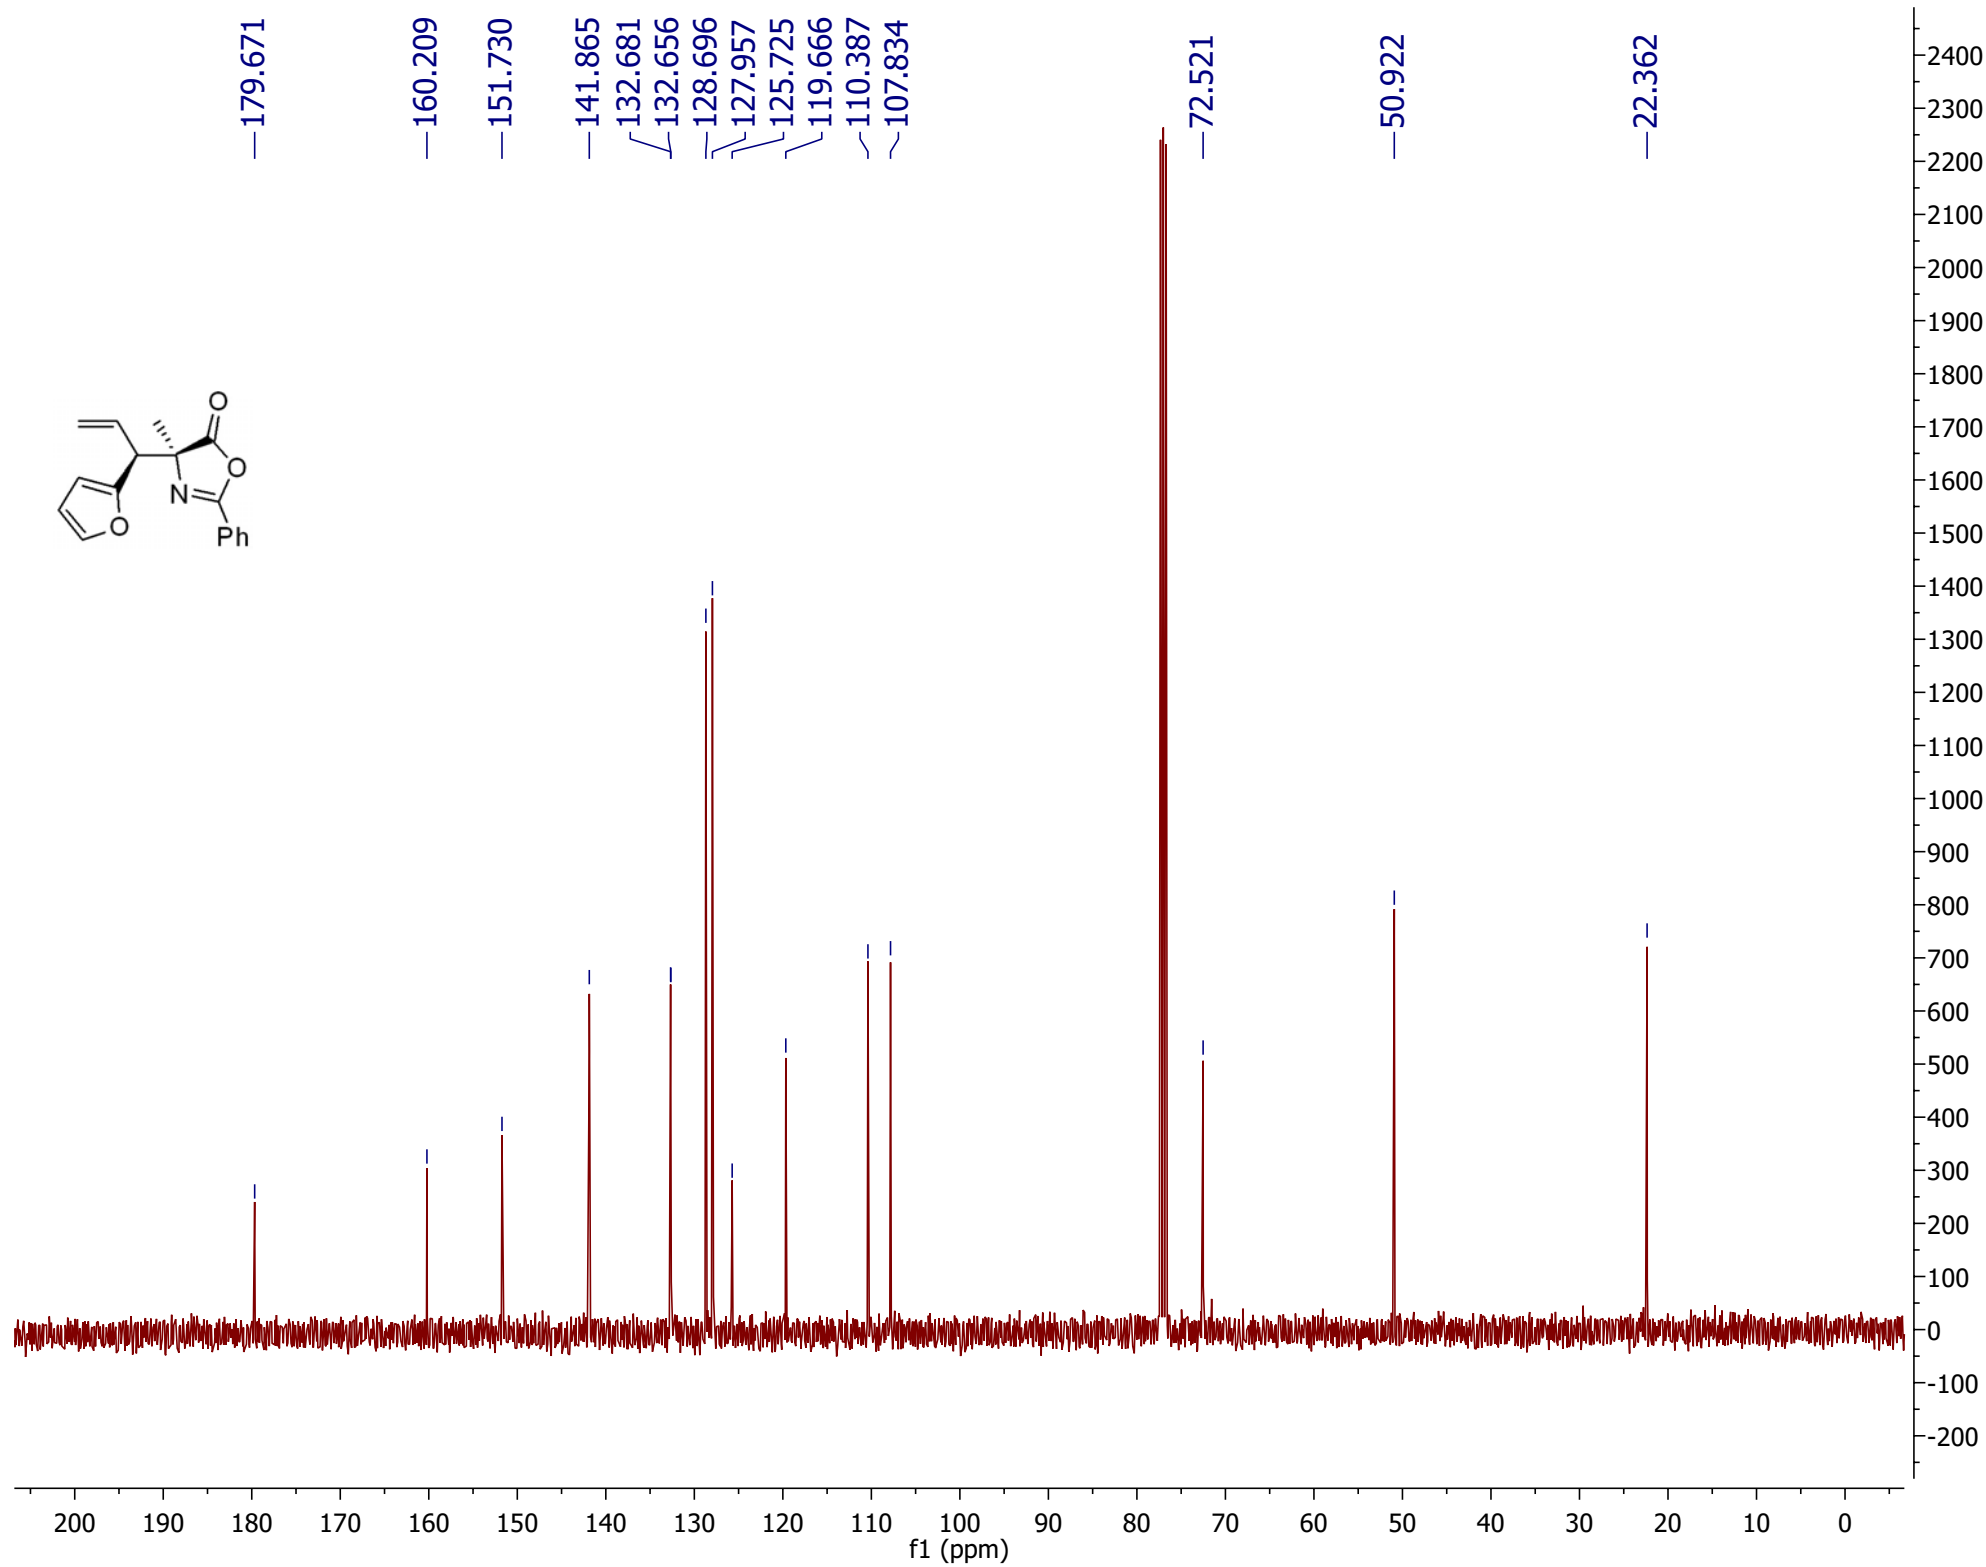

S42

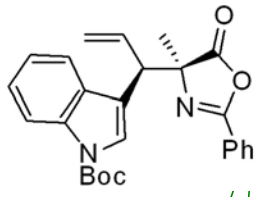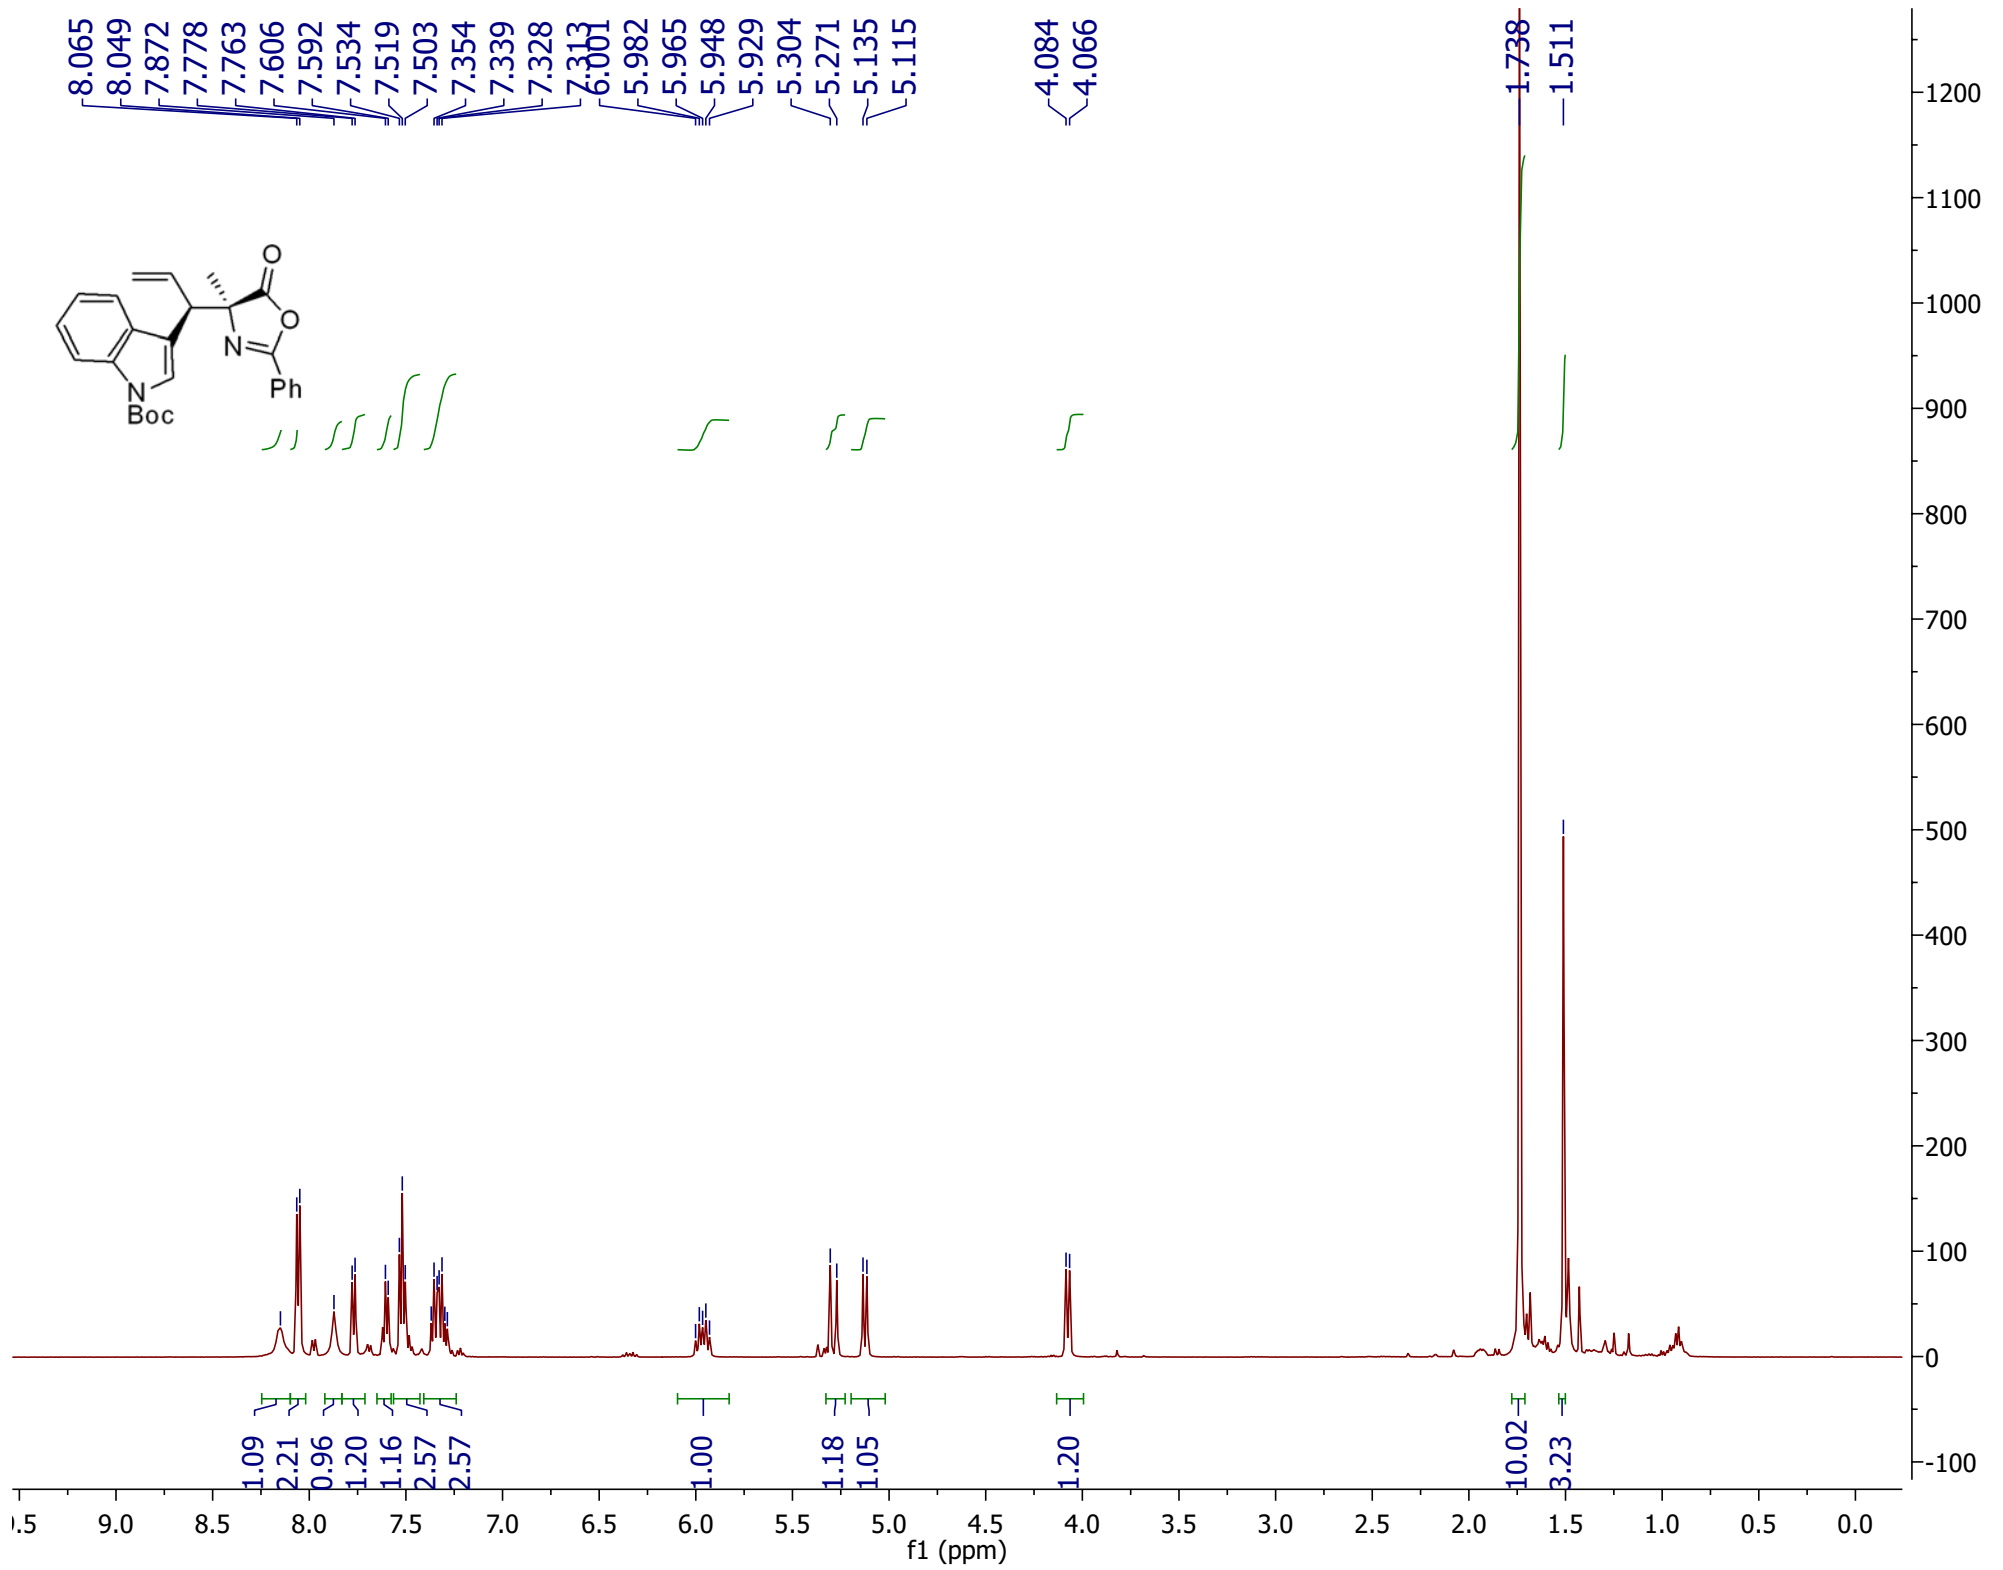

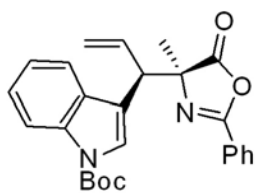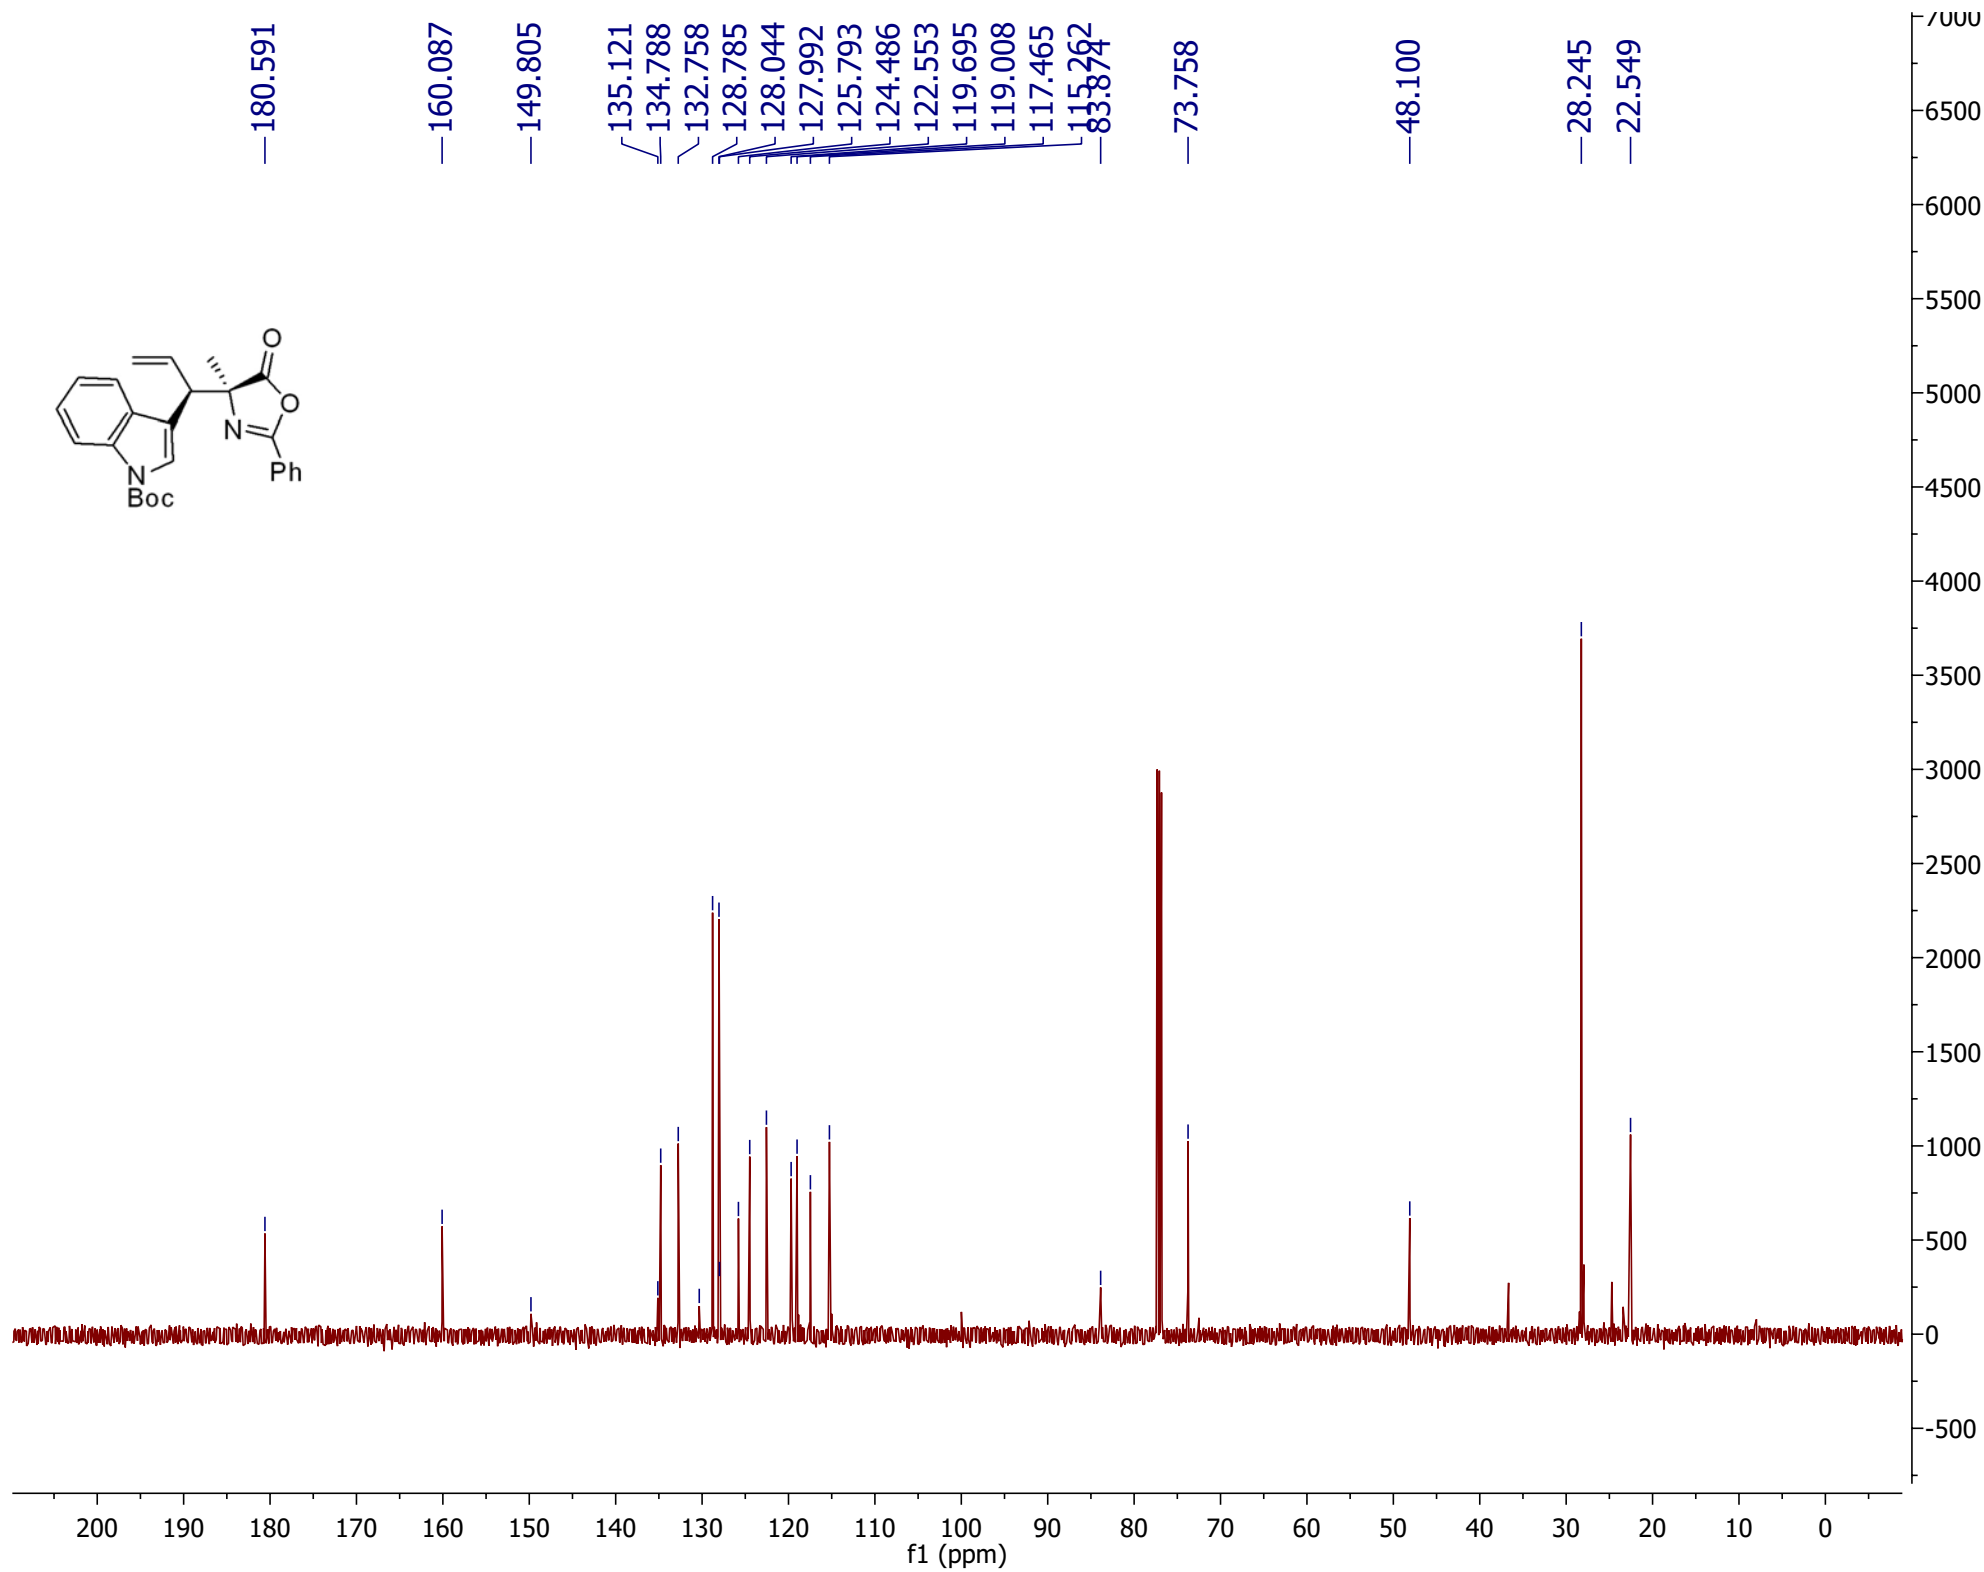

S44

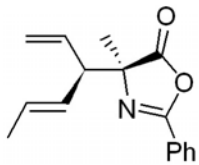

8.032  
8.017  
7.595  
7.523  
7.518  
7.508  
7.494  
5.704  
5.698  
5.684  
5.680  
5.666  
5.653  
5.589  
5.571  
5.541  
5.186  
5.151  
5.100  
5.097  
5.079  
5.077  
3.141  
3.124  
3.106  
1.746  
1.743  
1.734  
1.490

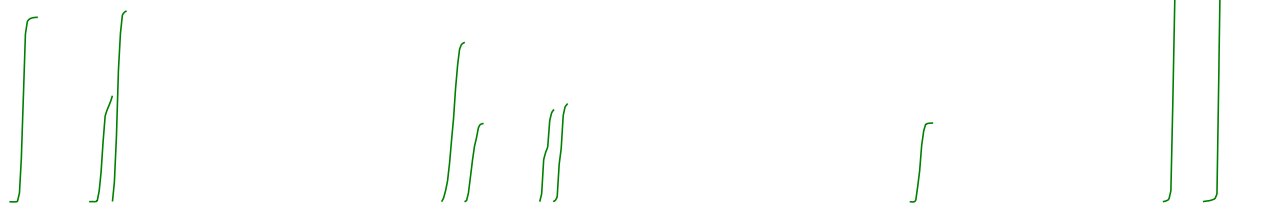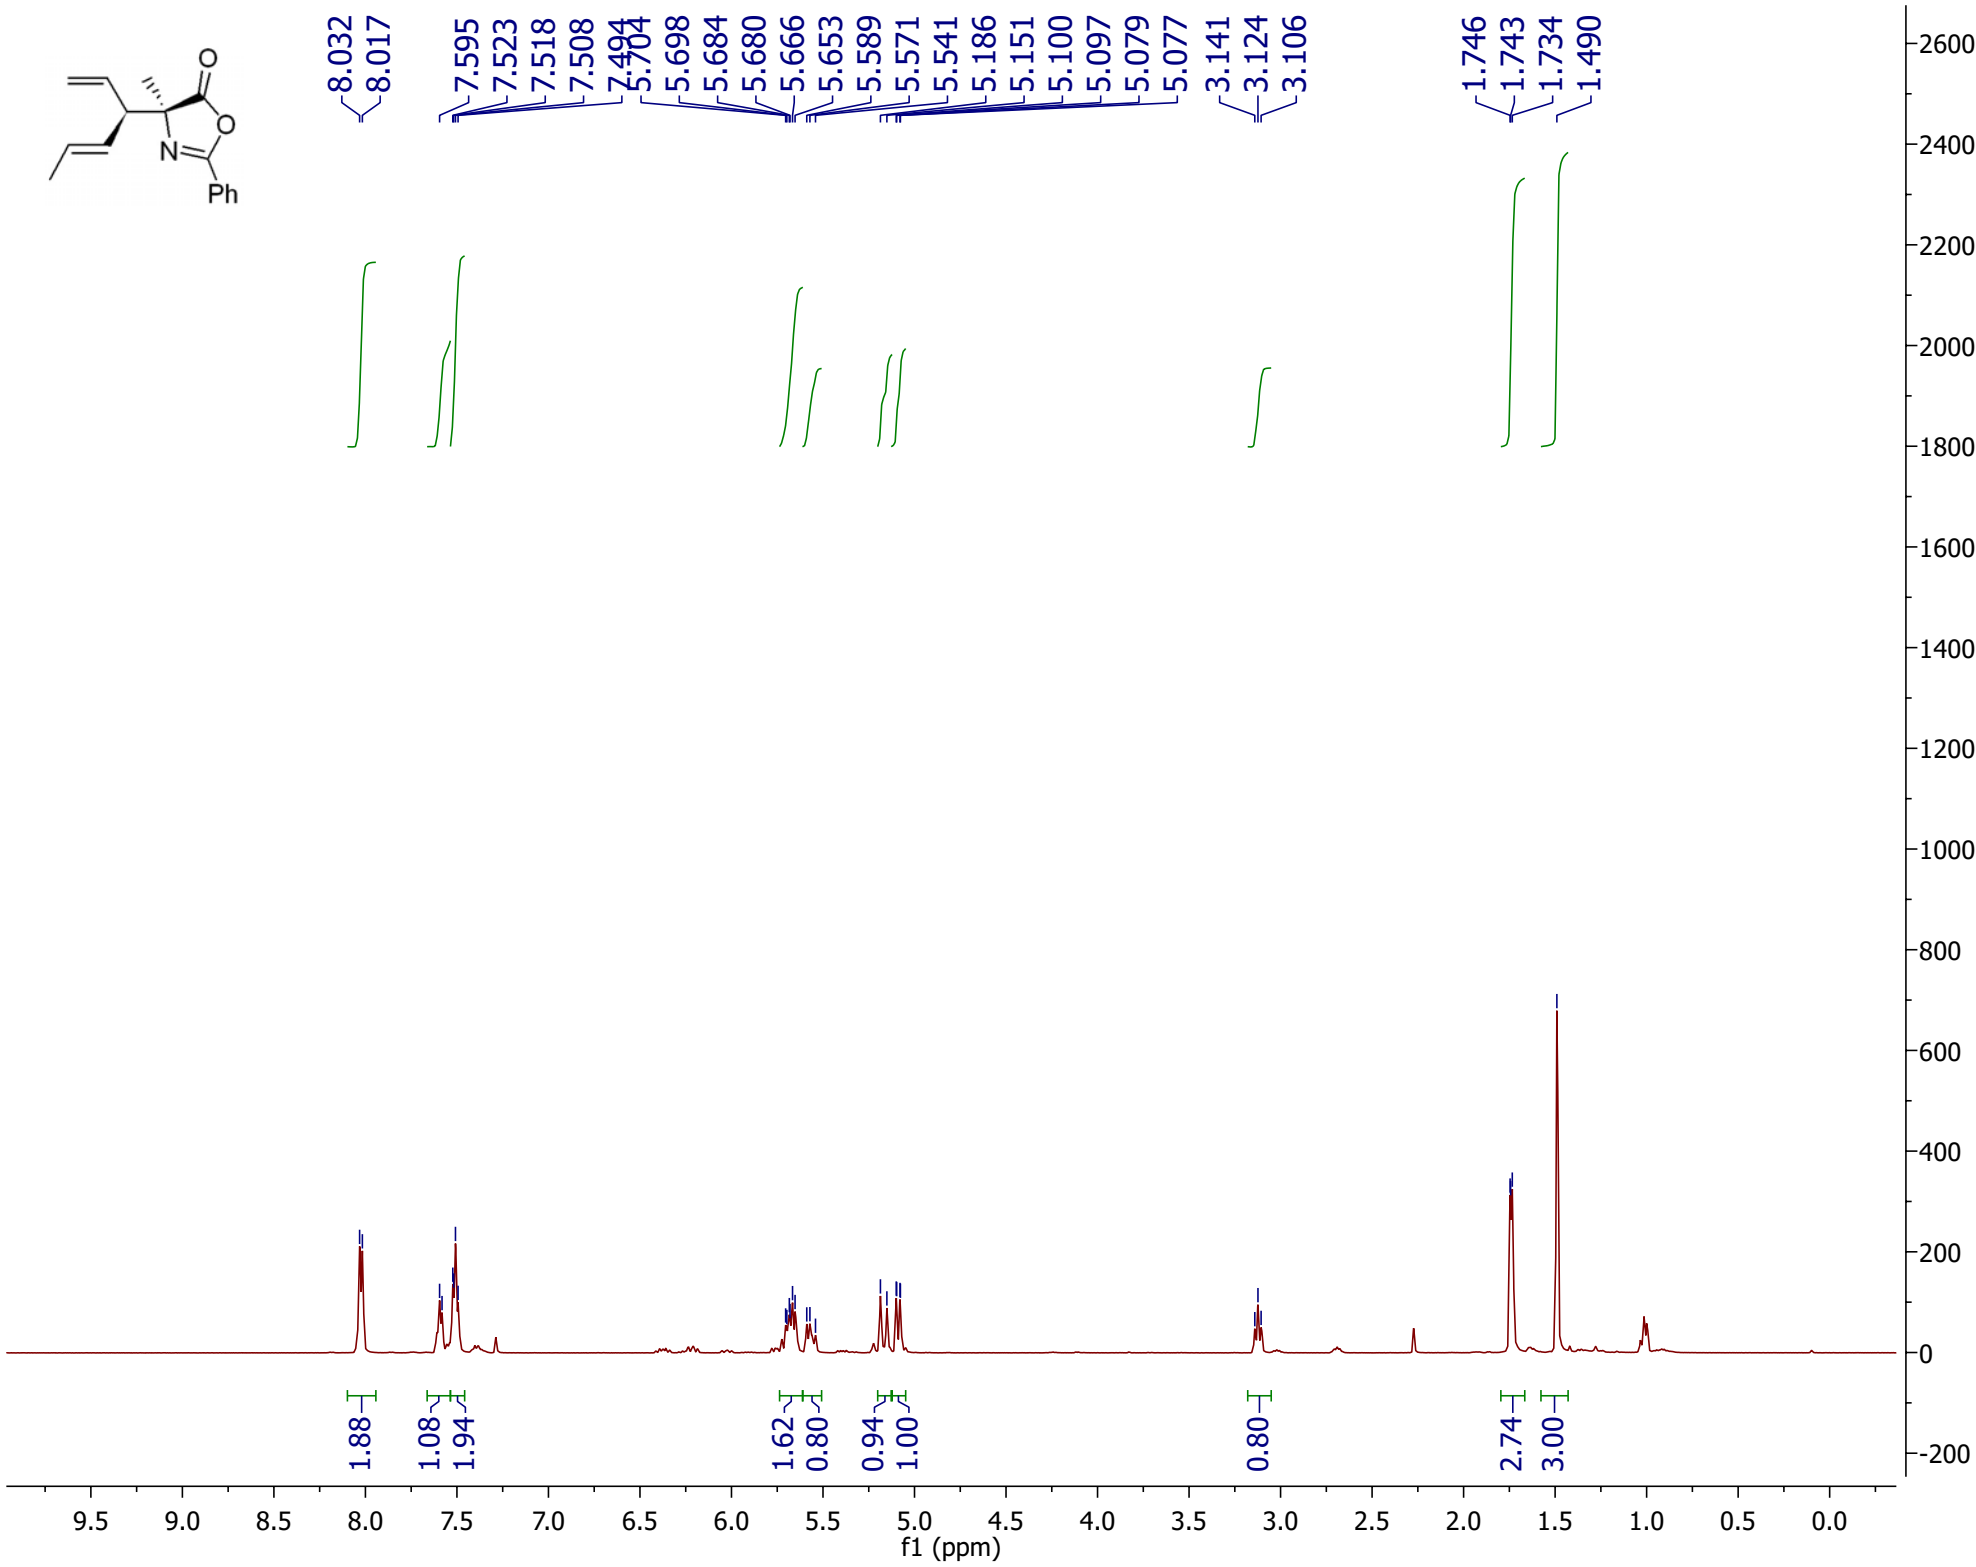

S45

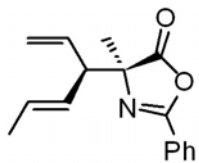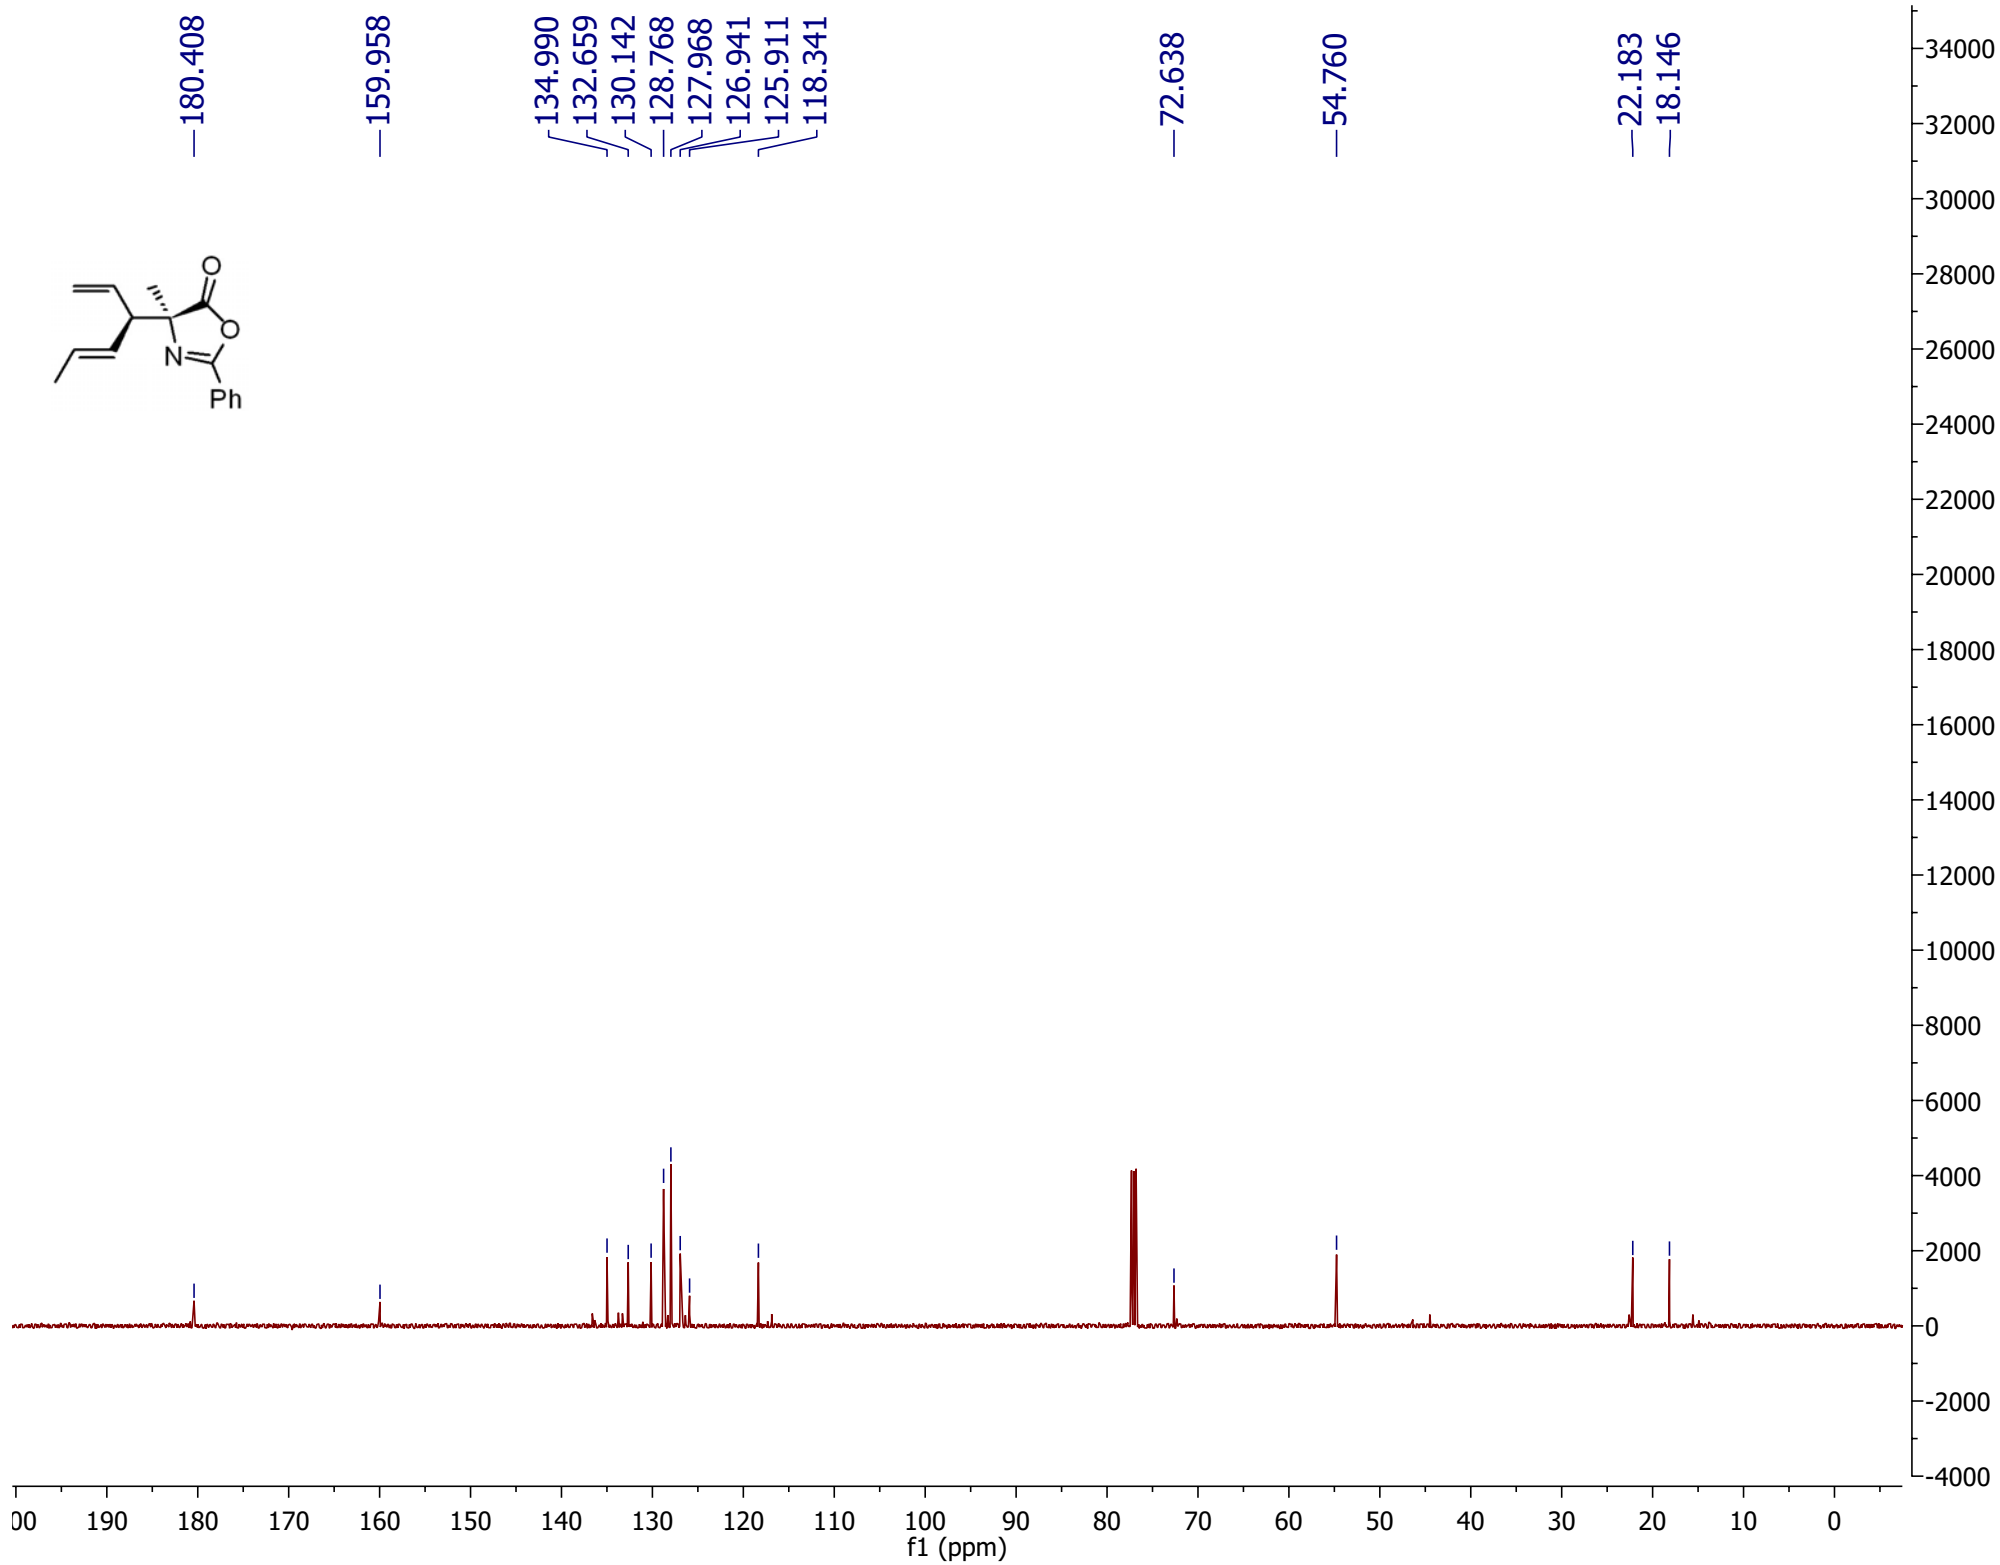

S46

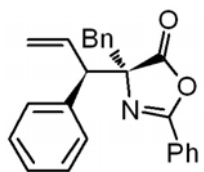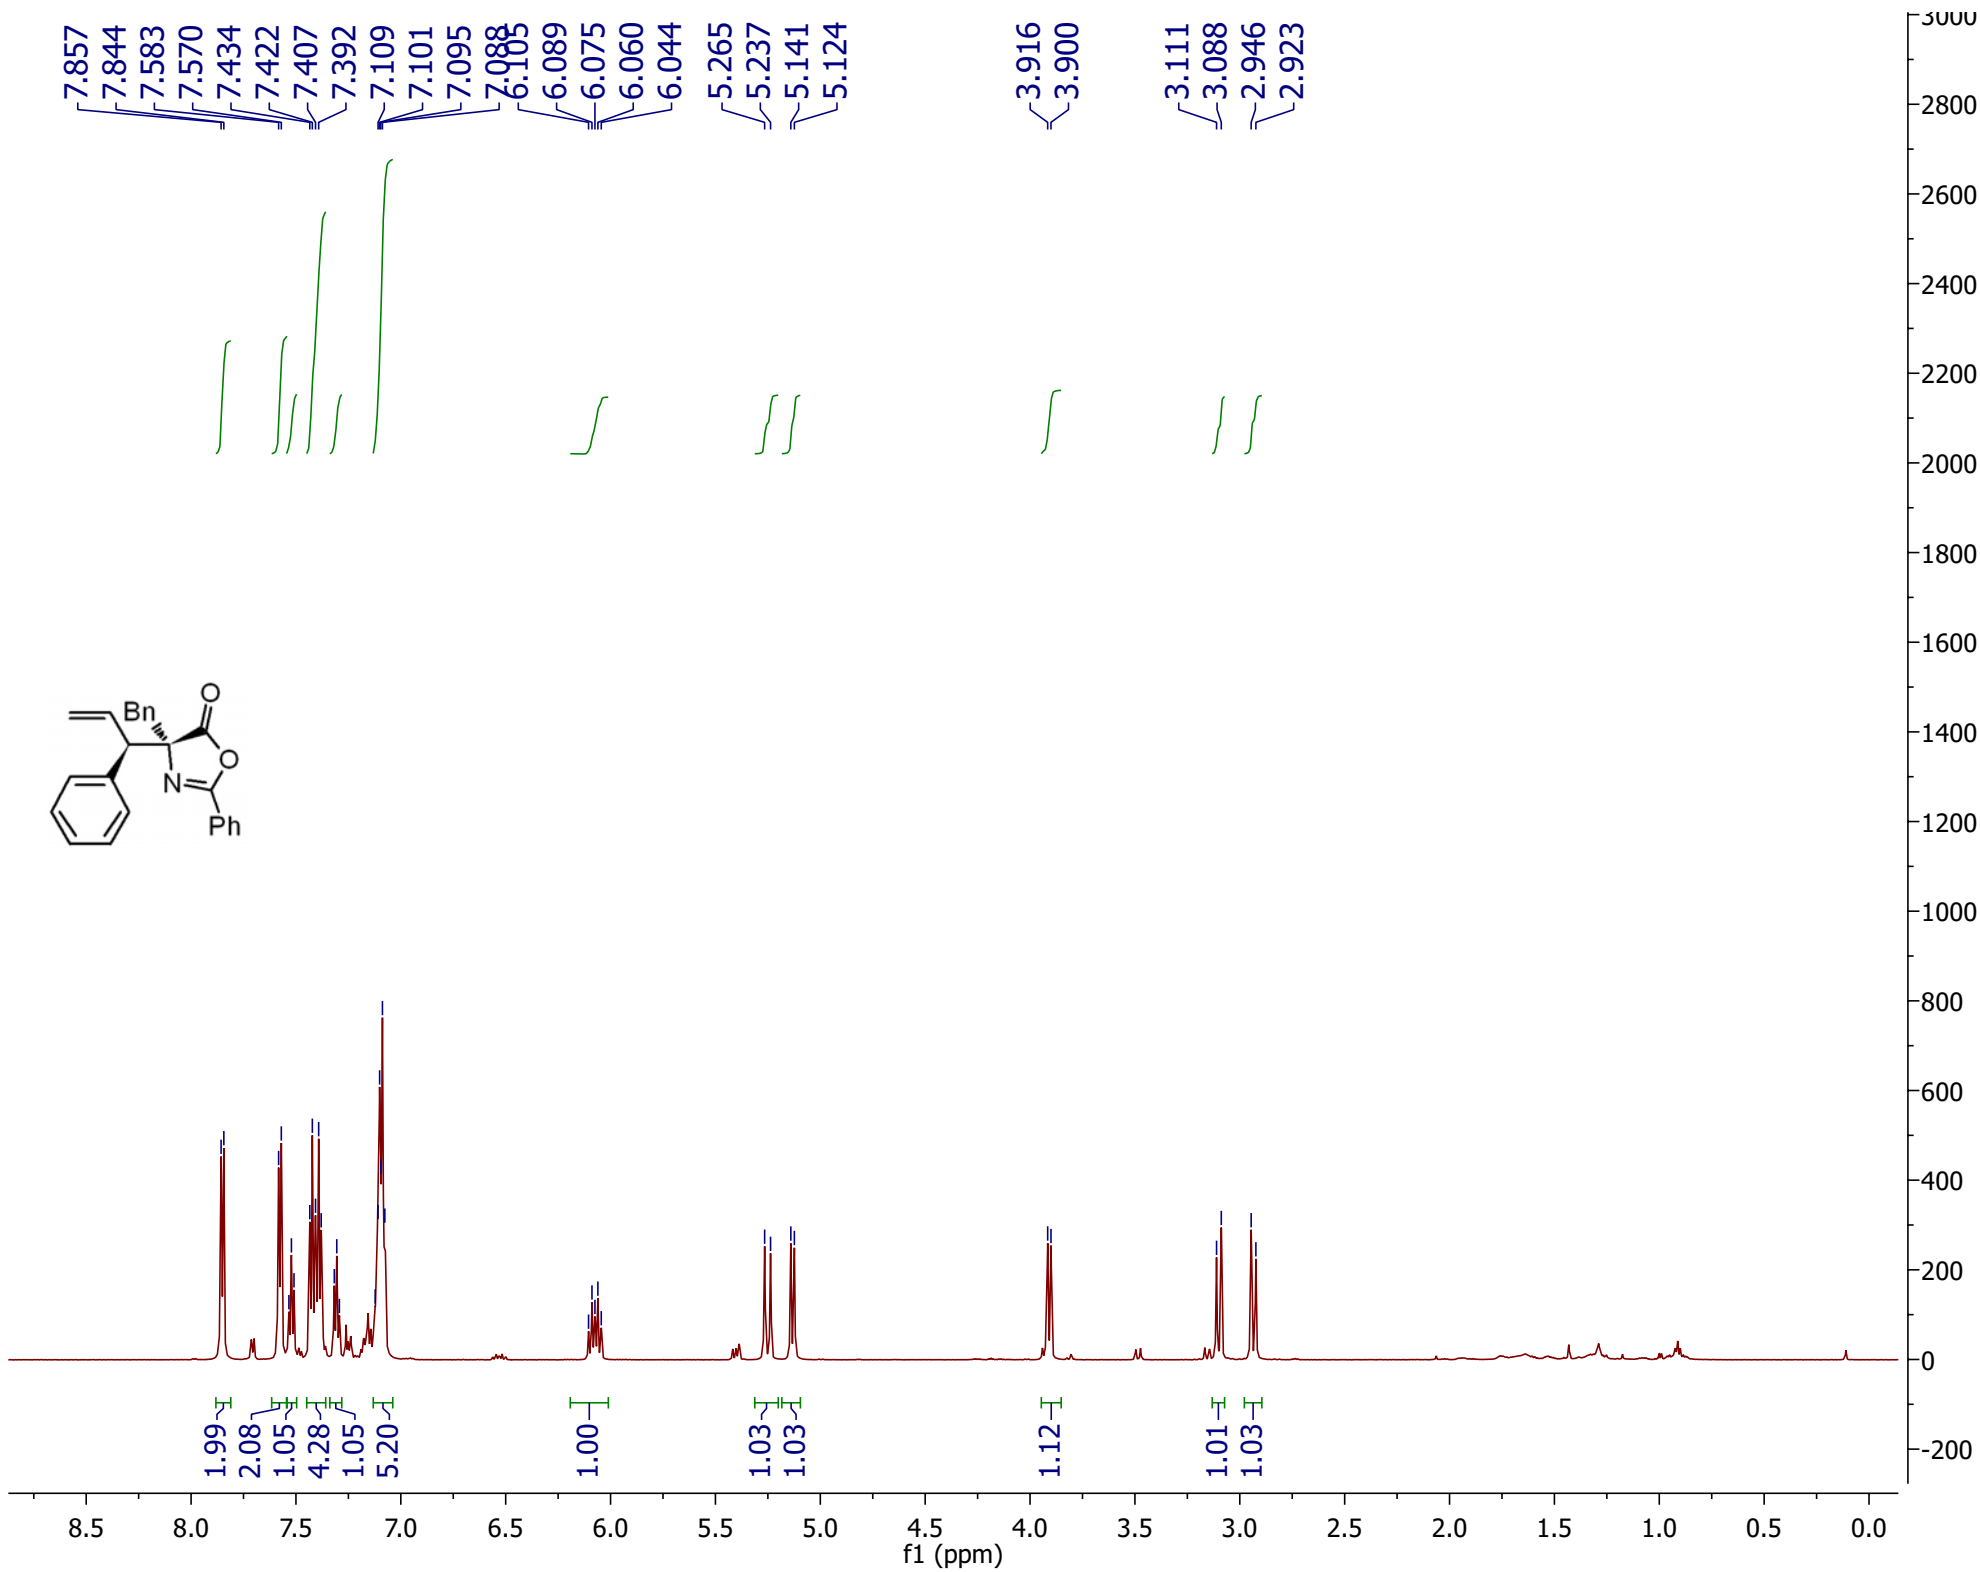

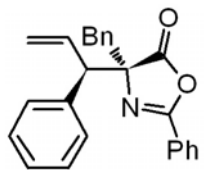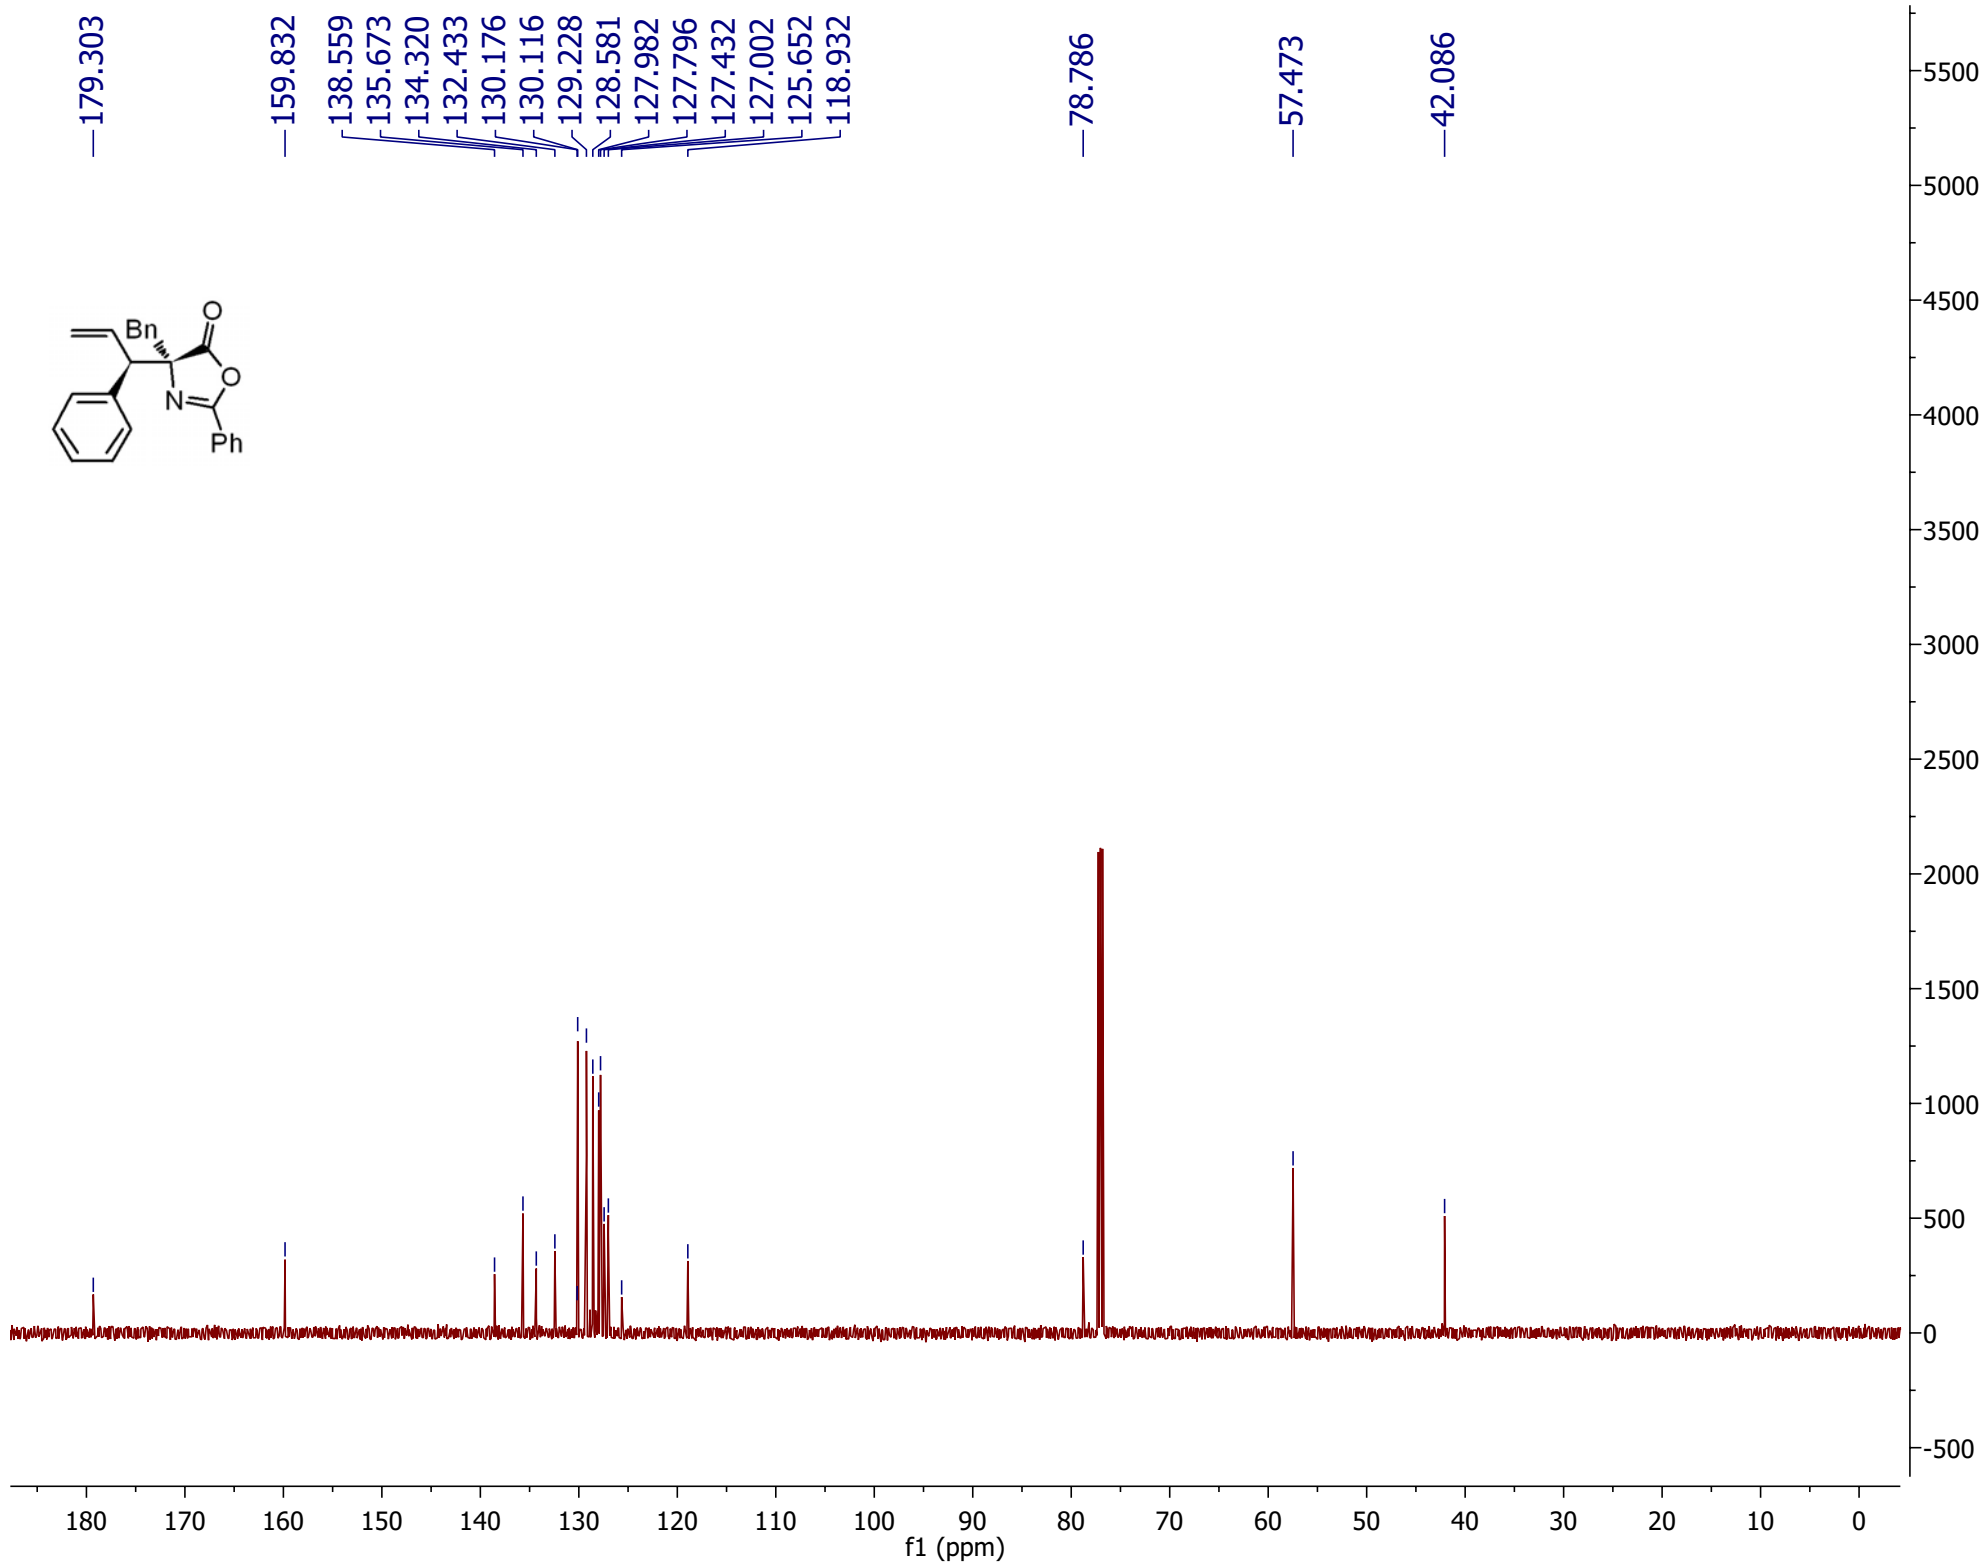



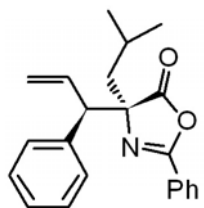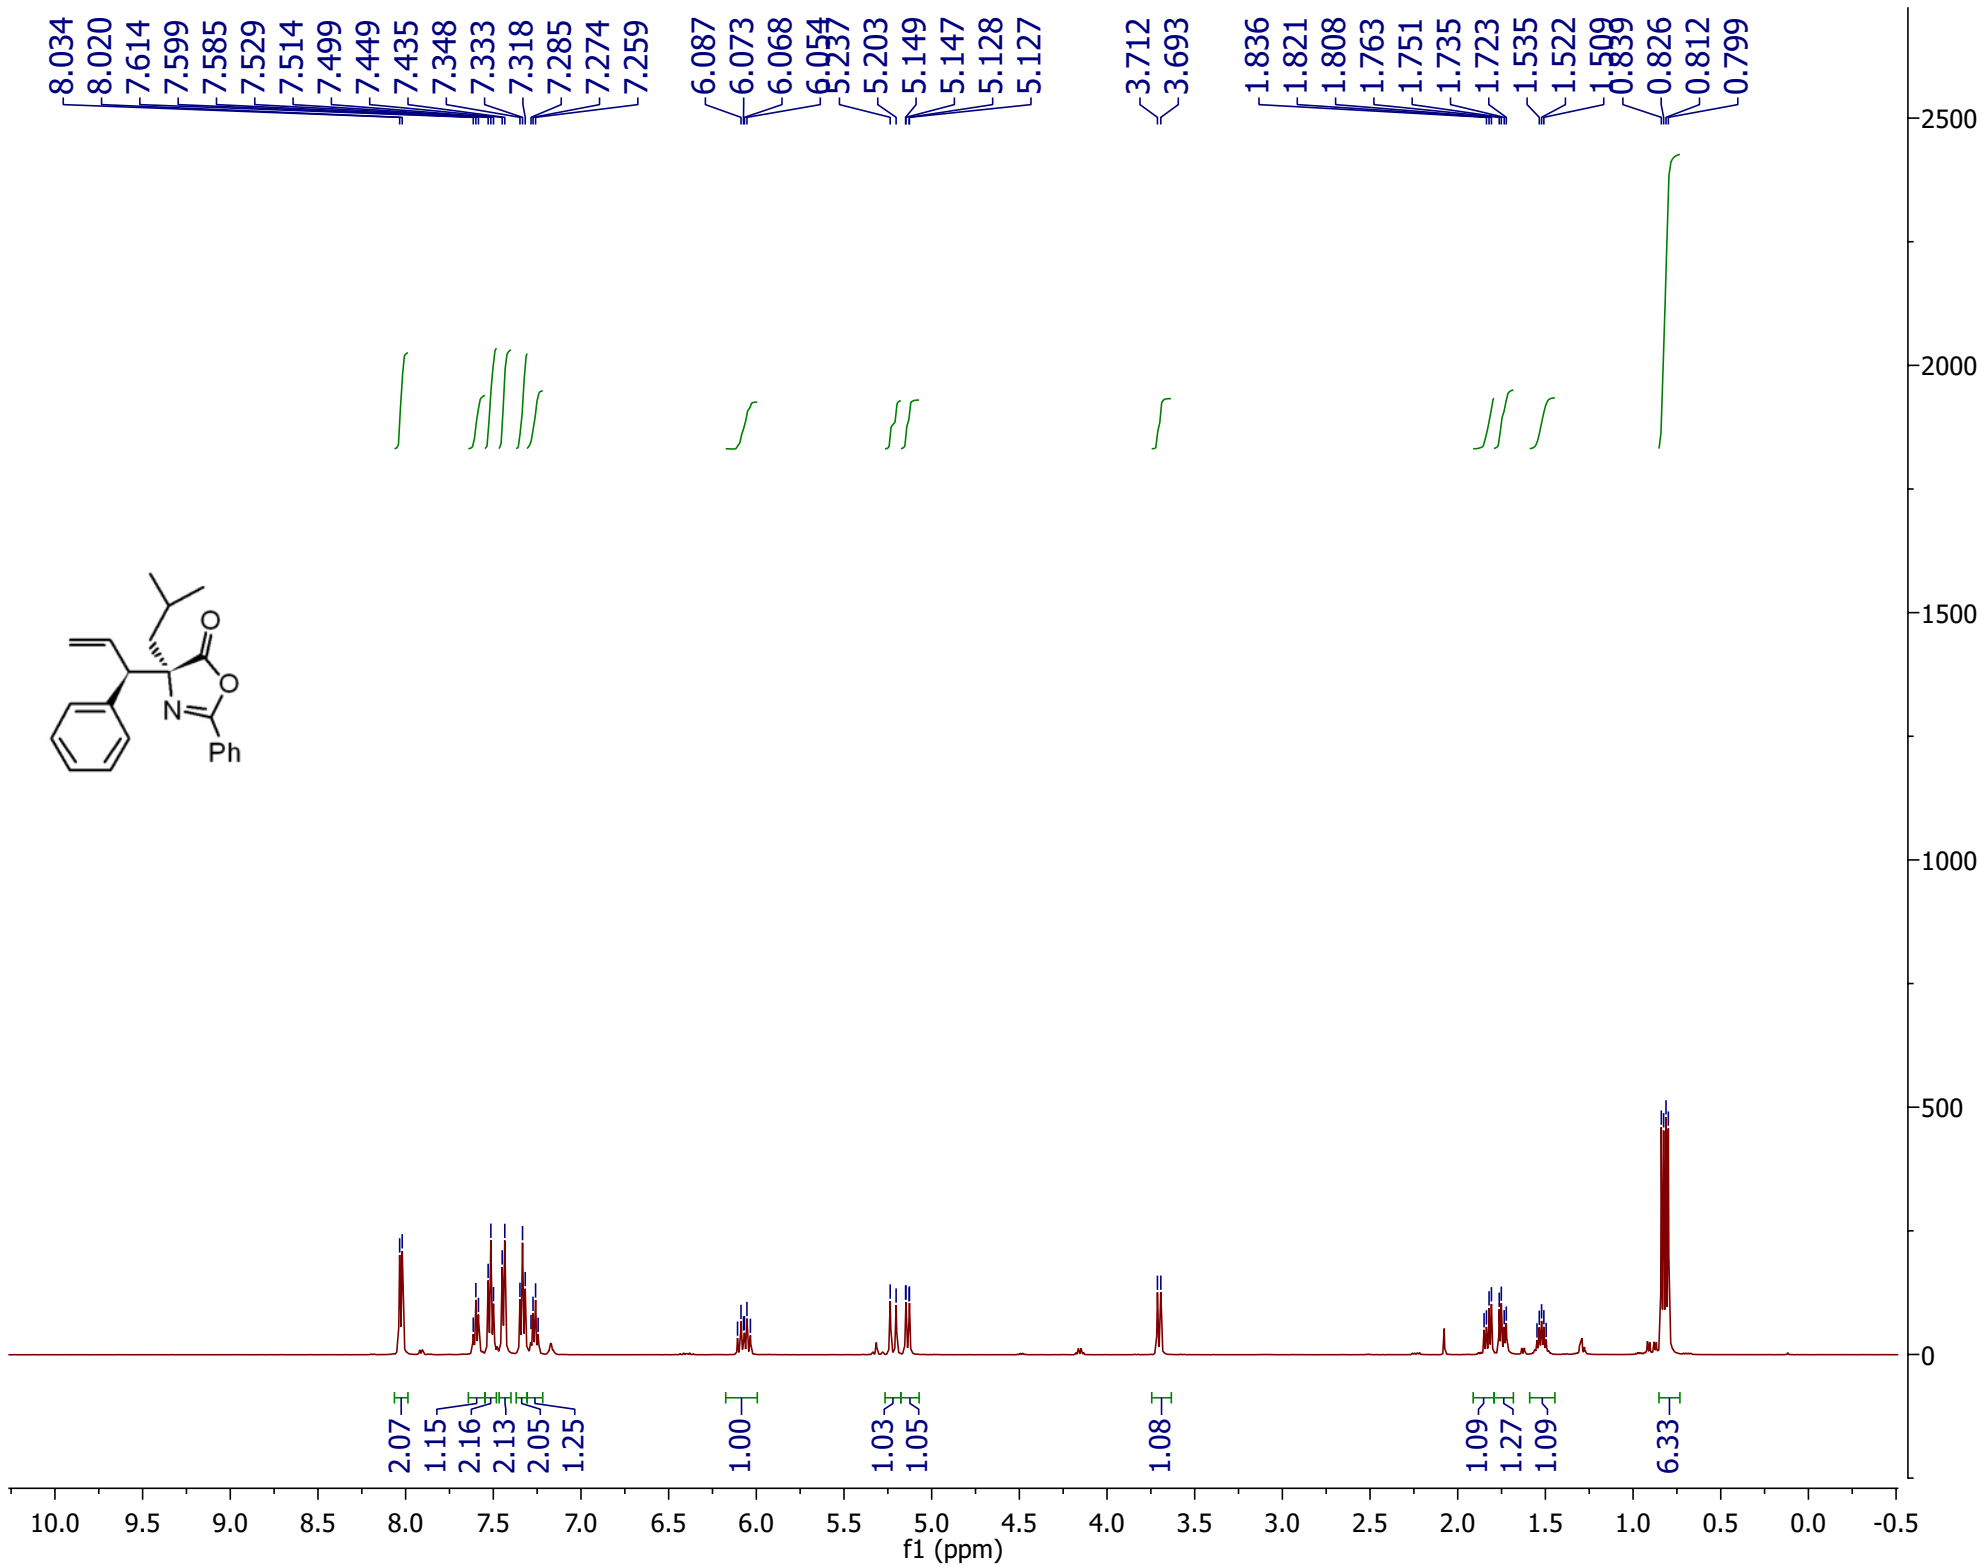

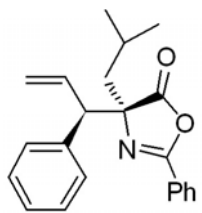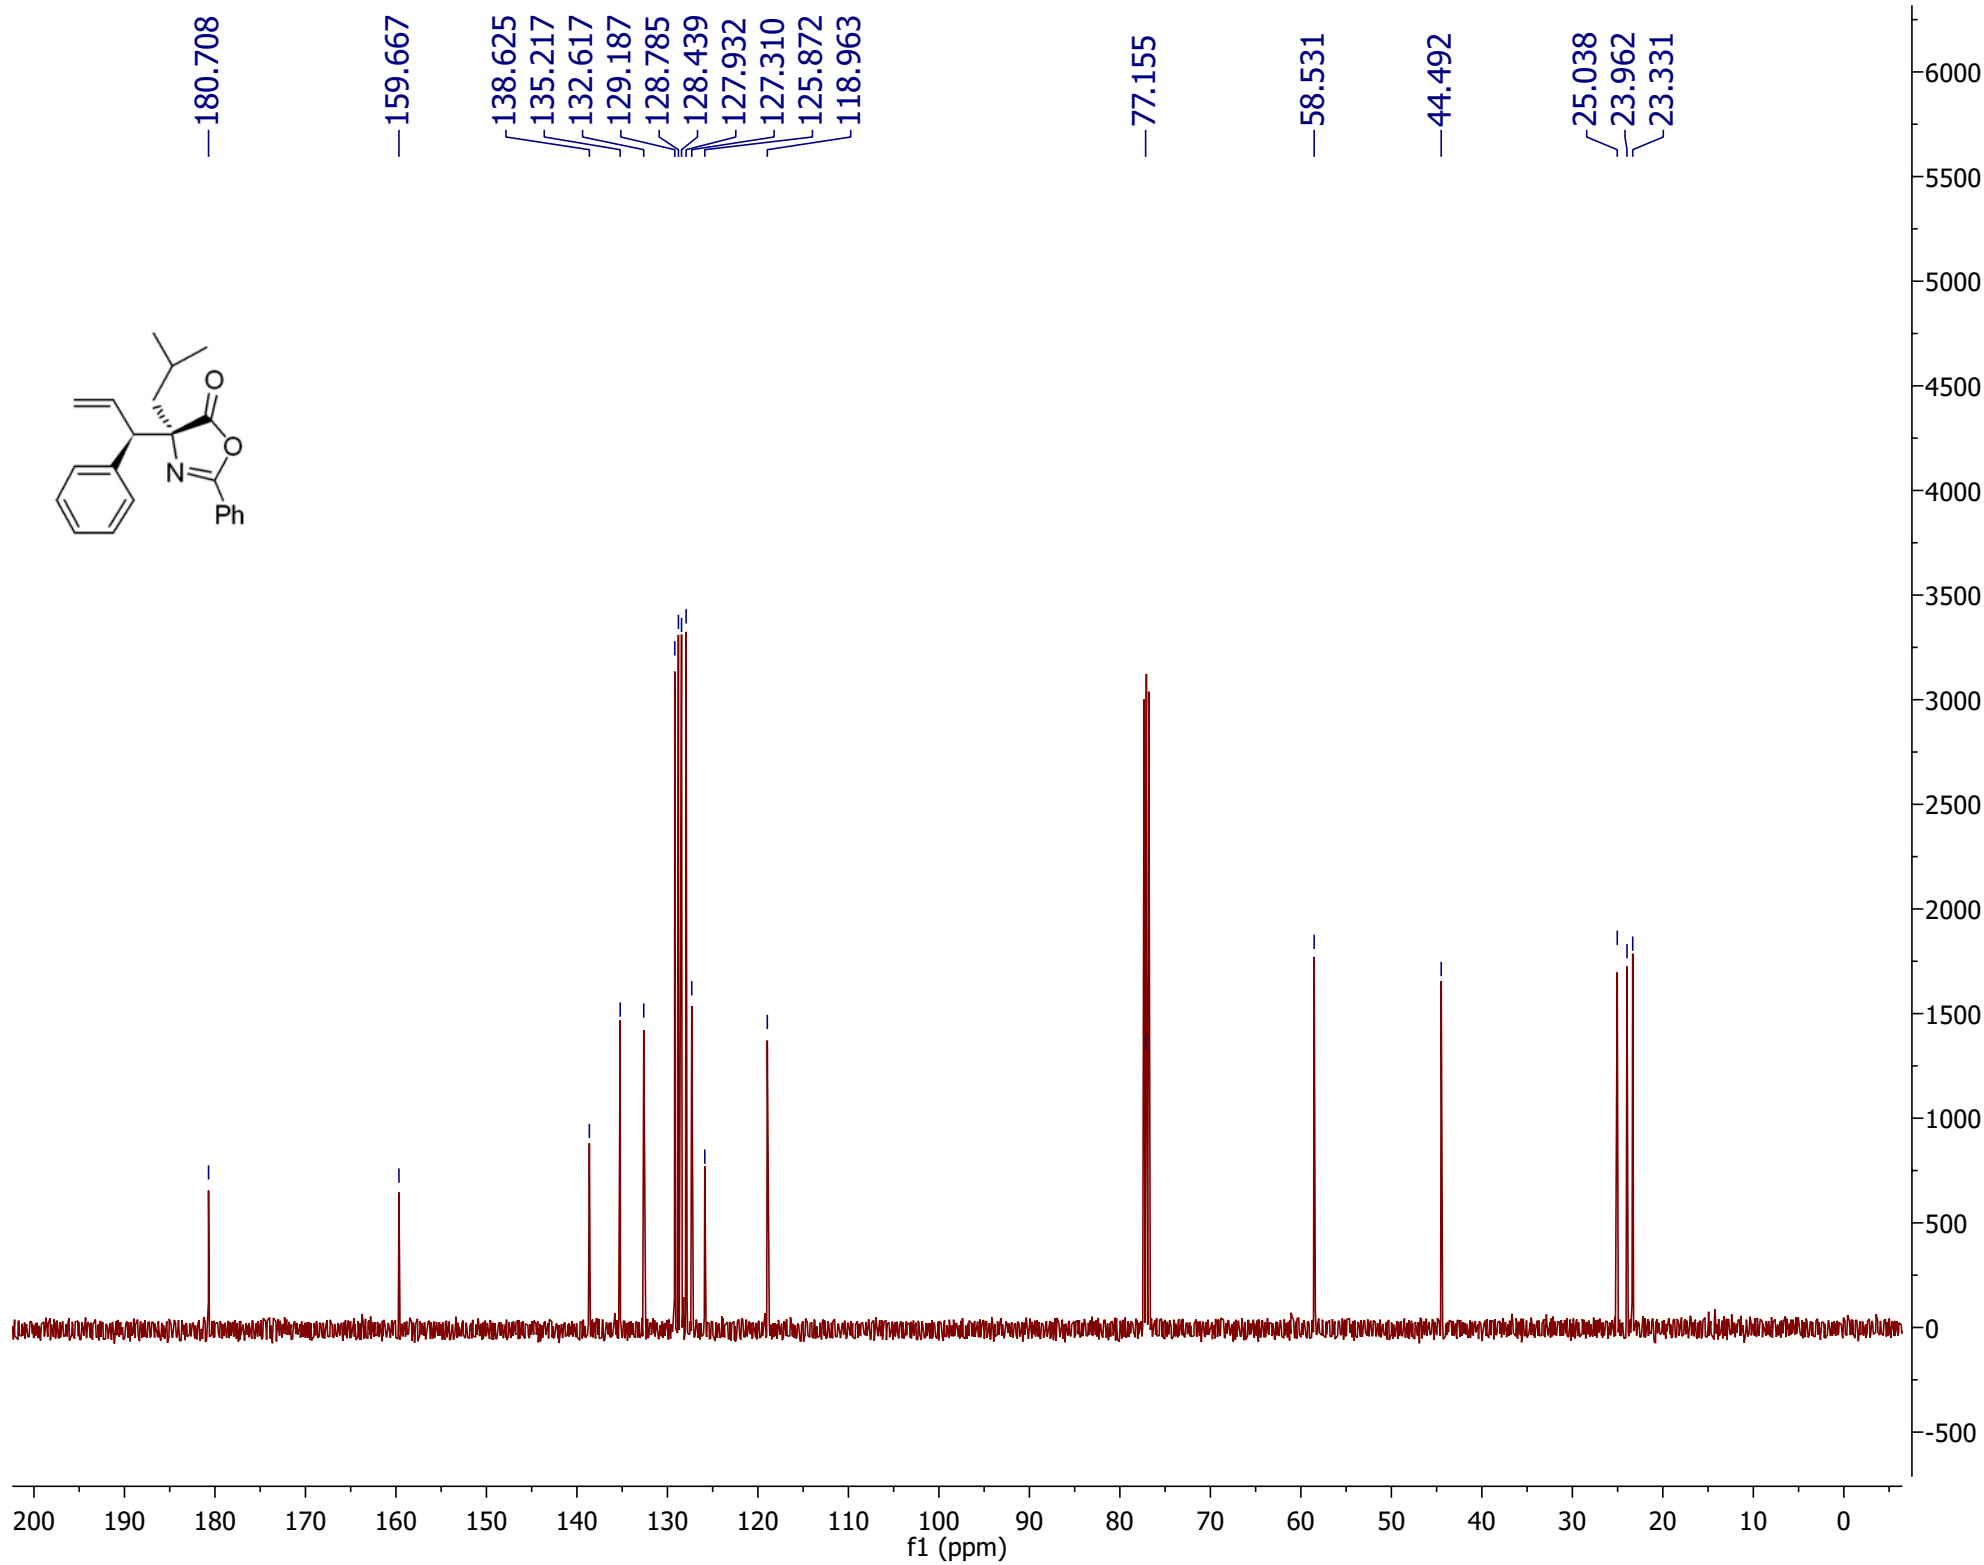

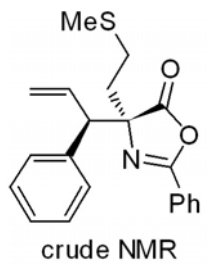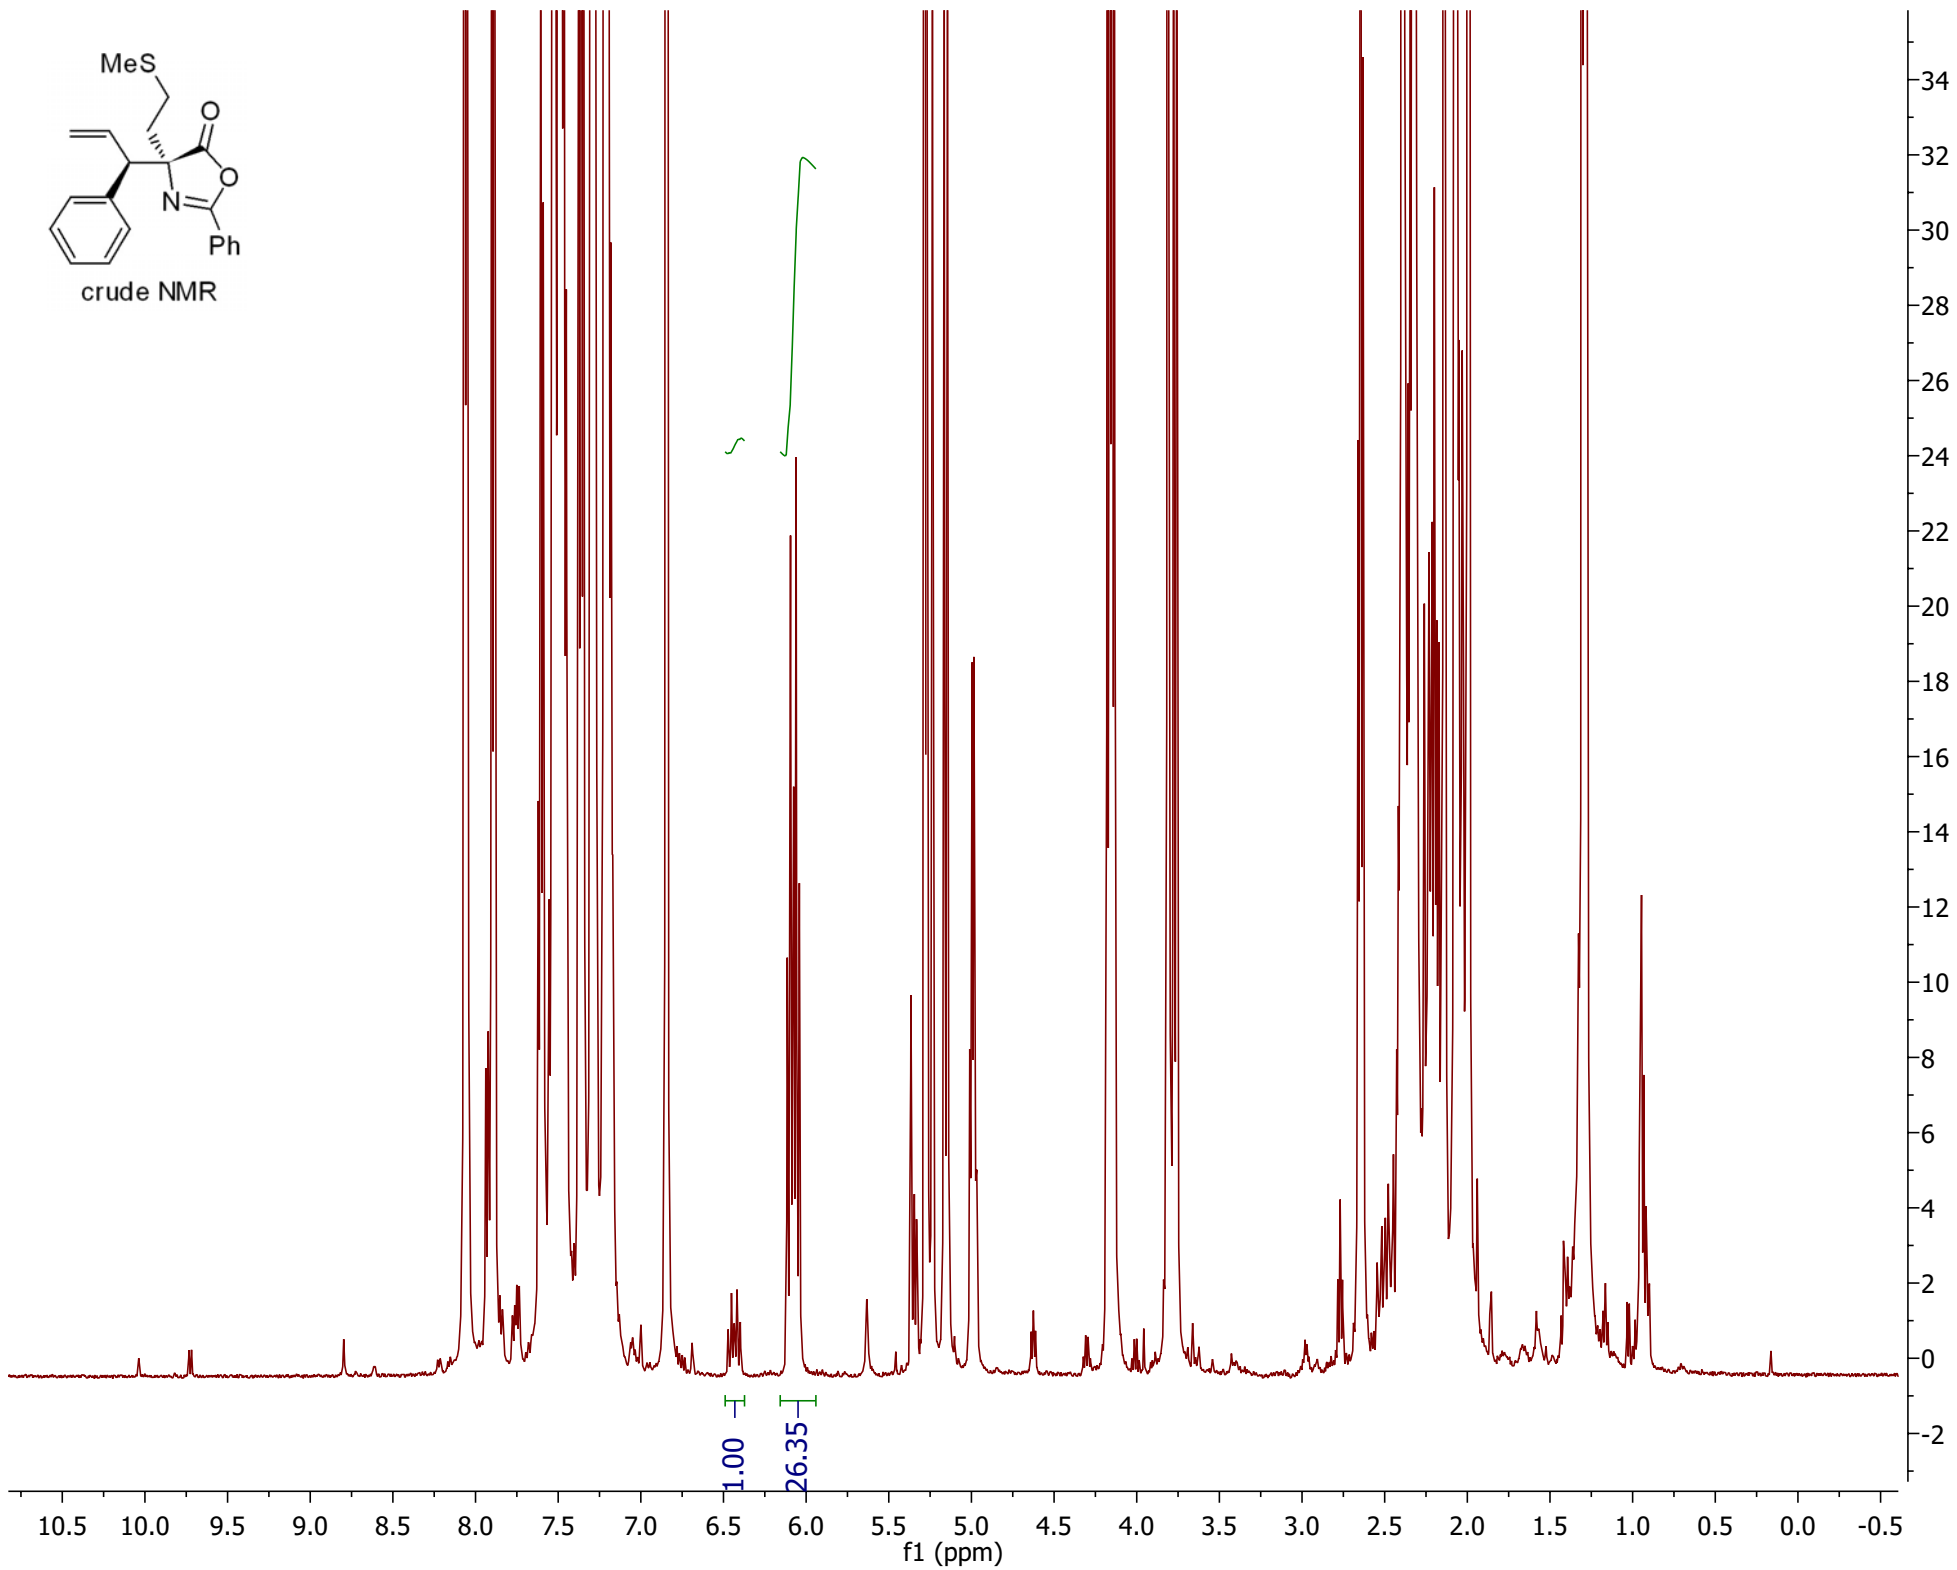

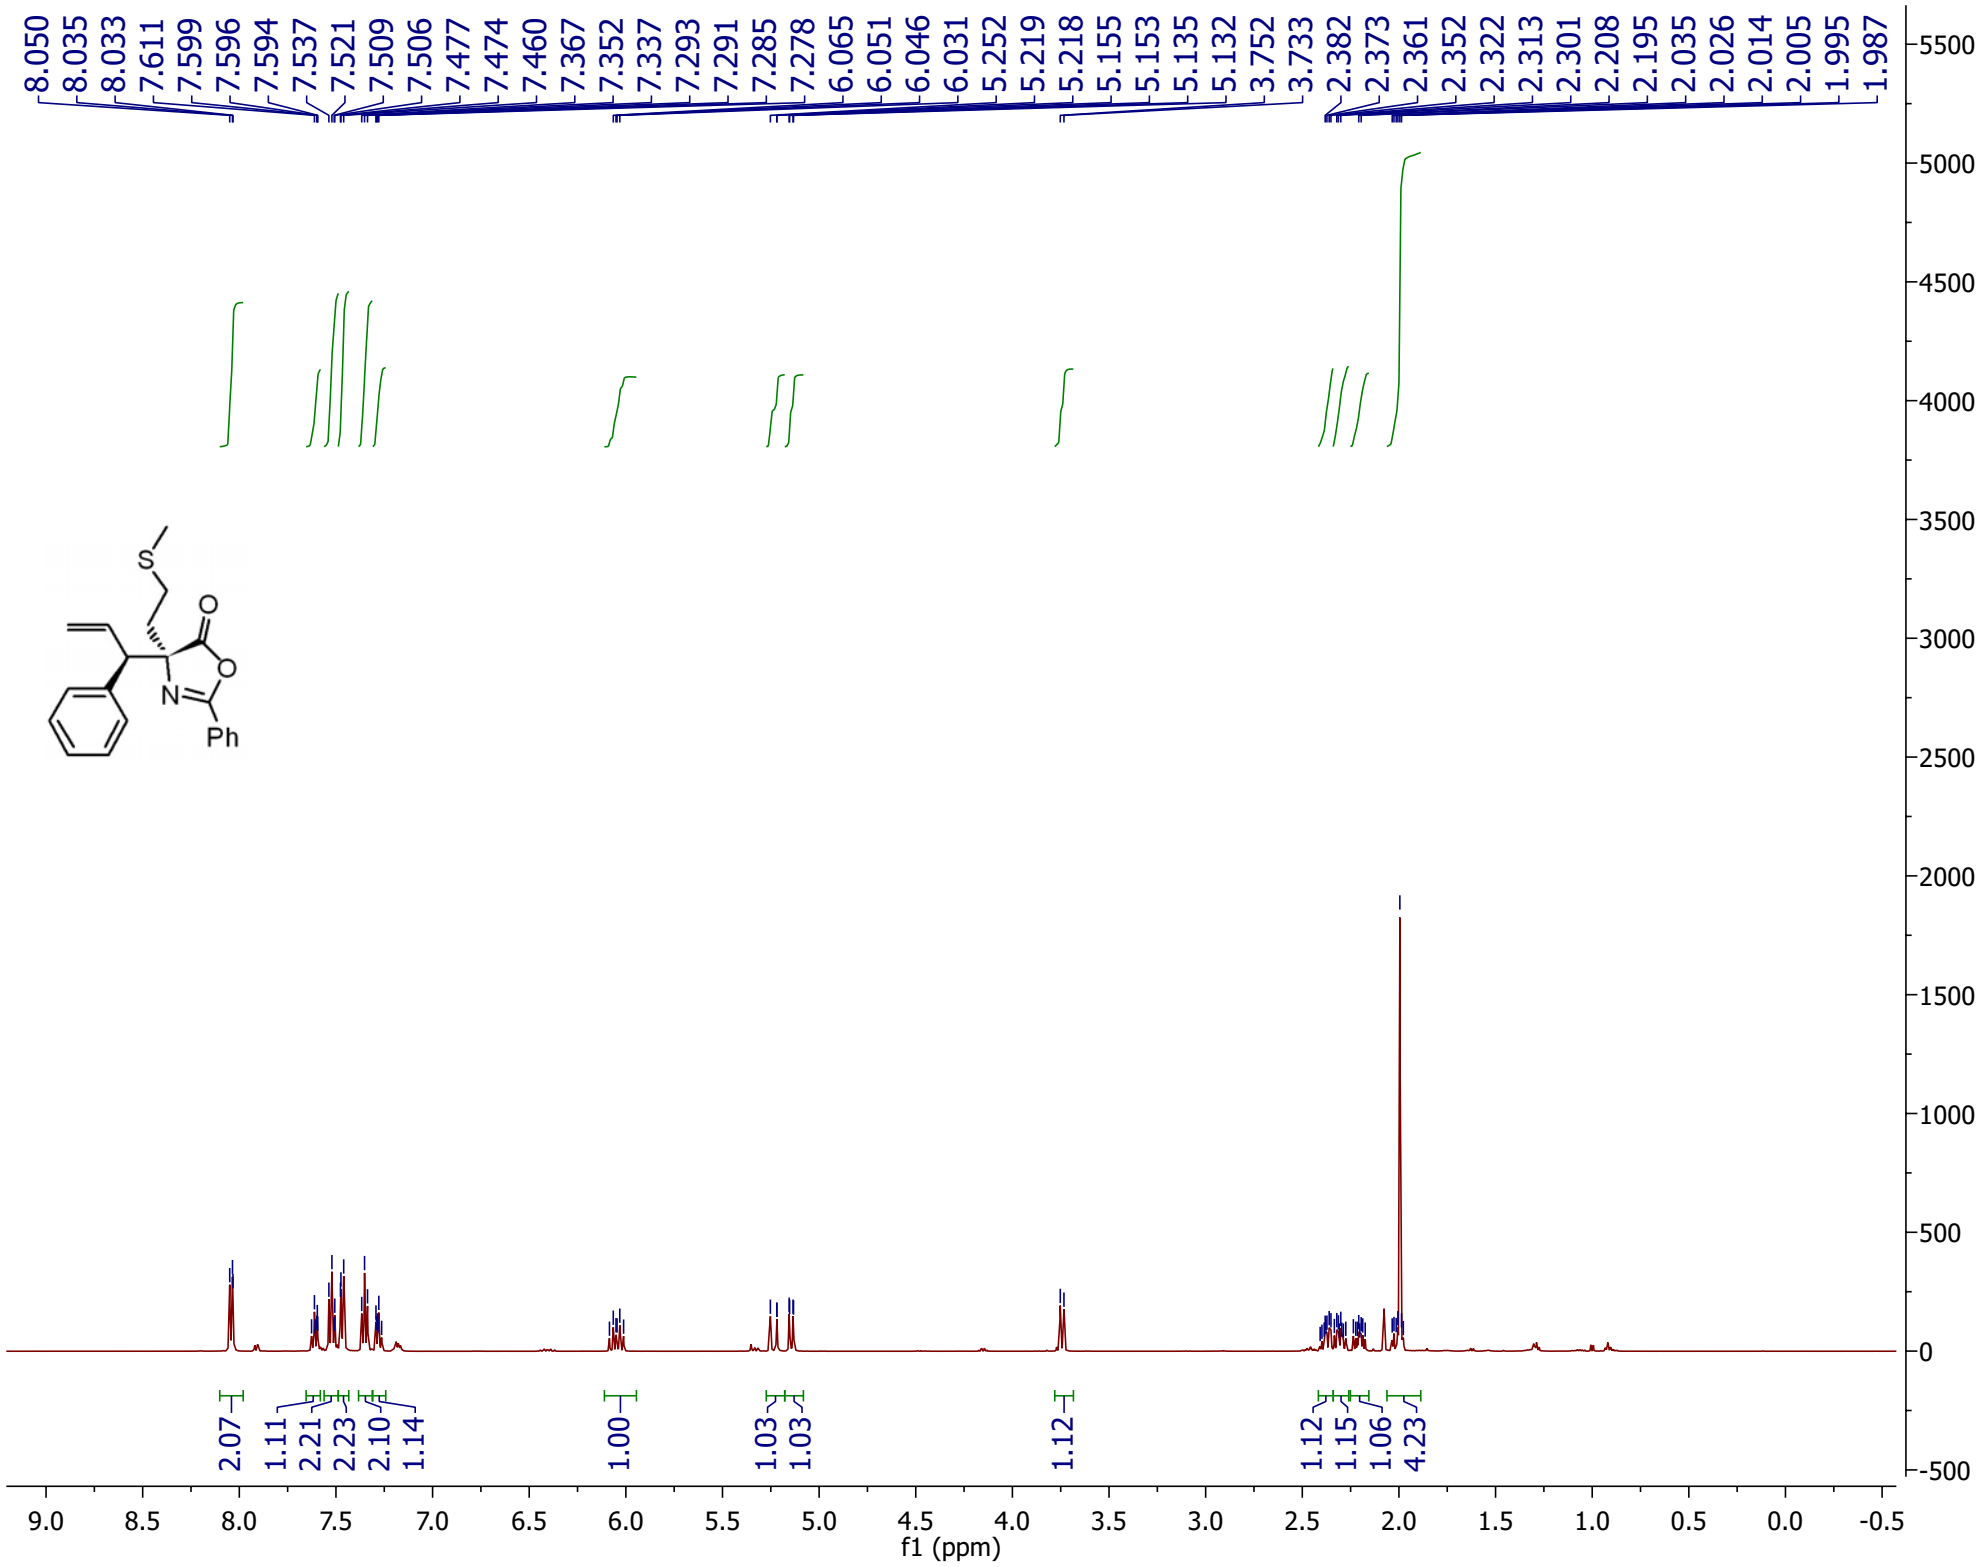

S52

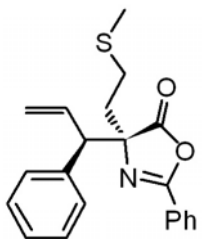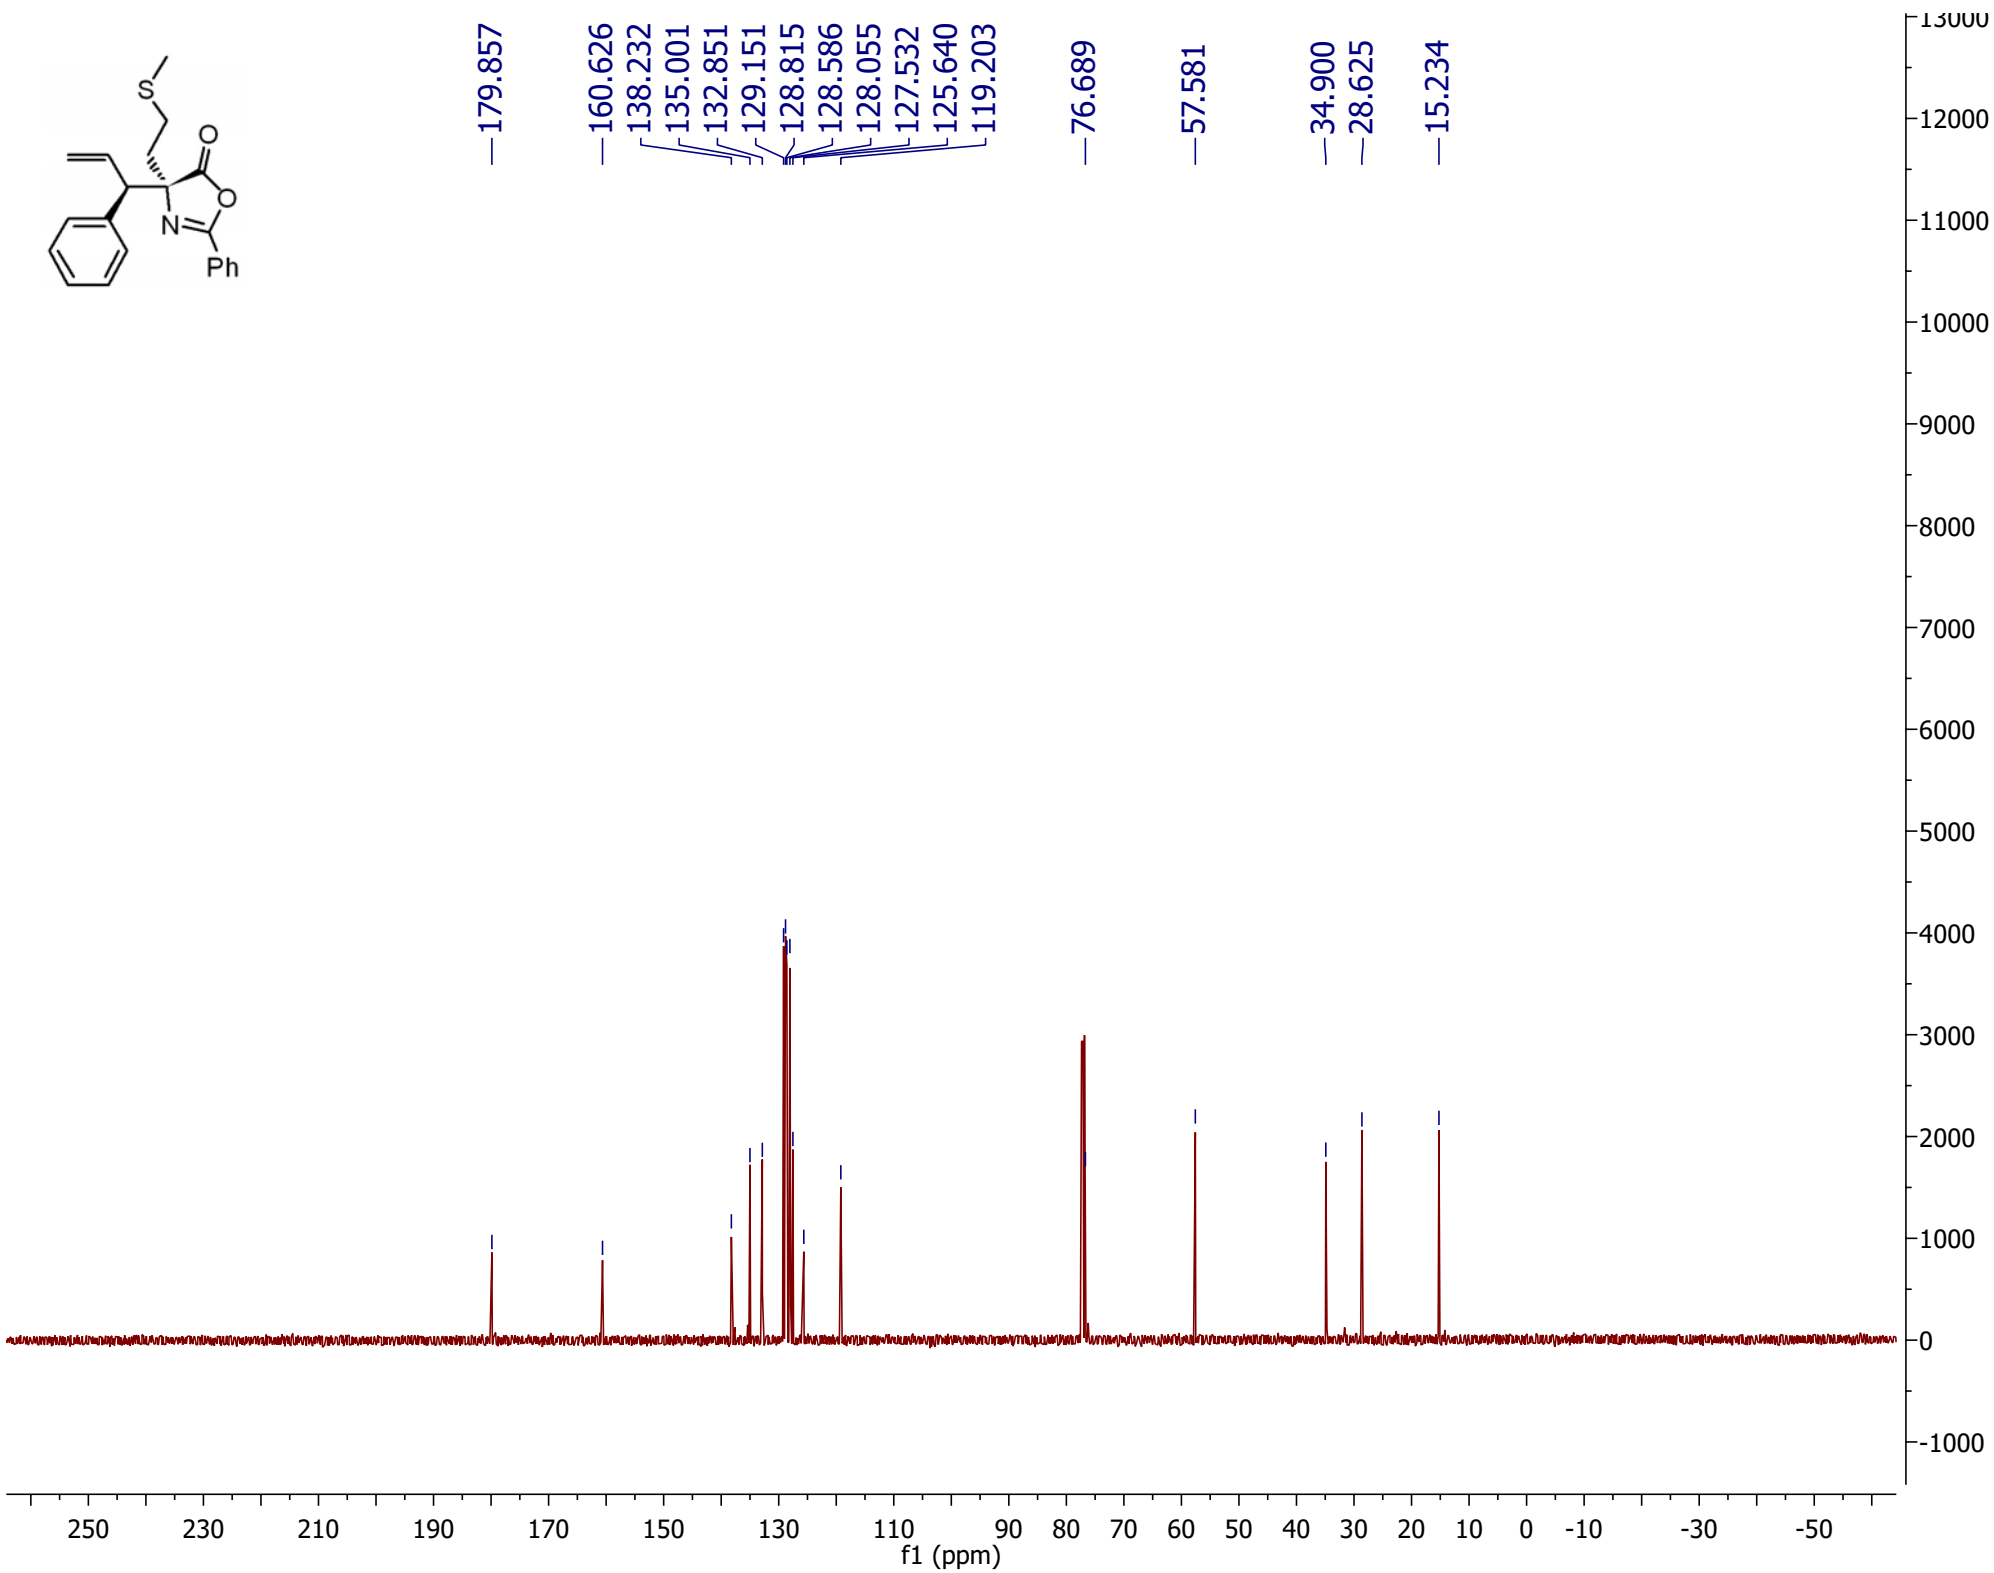

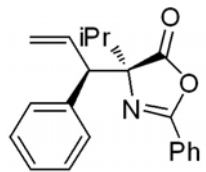

crude NMR

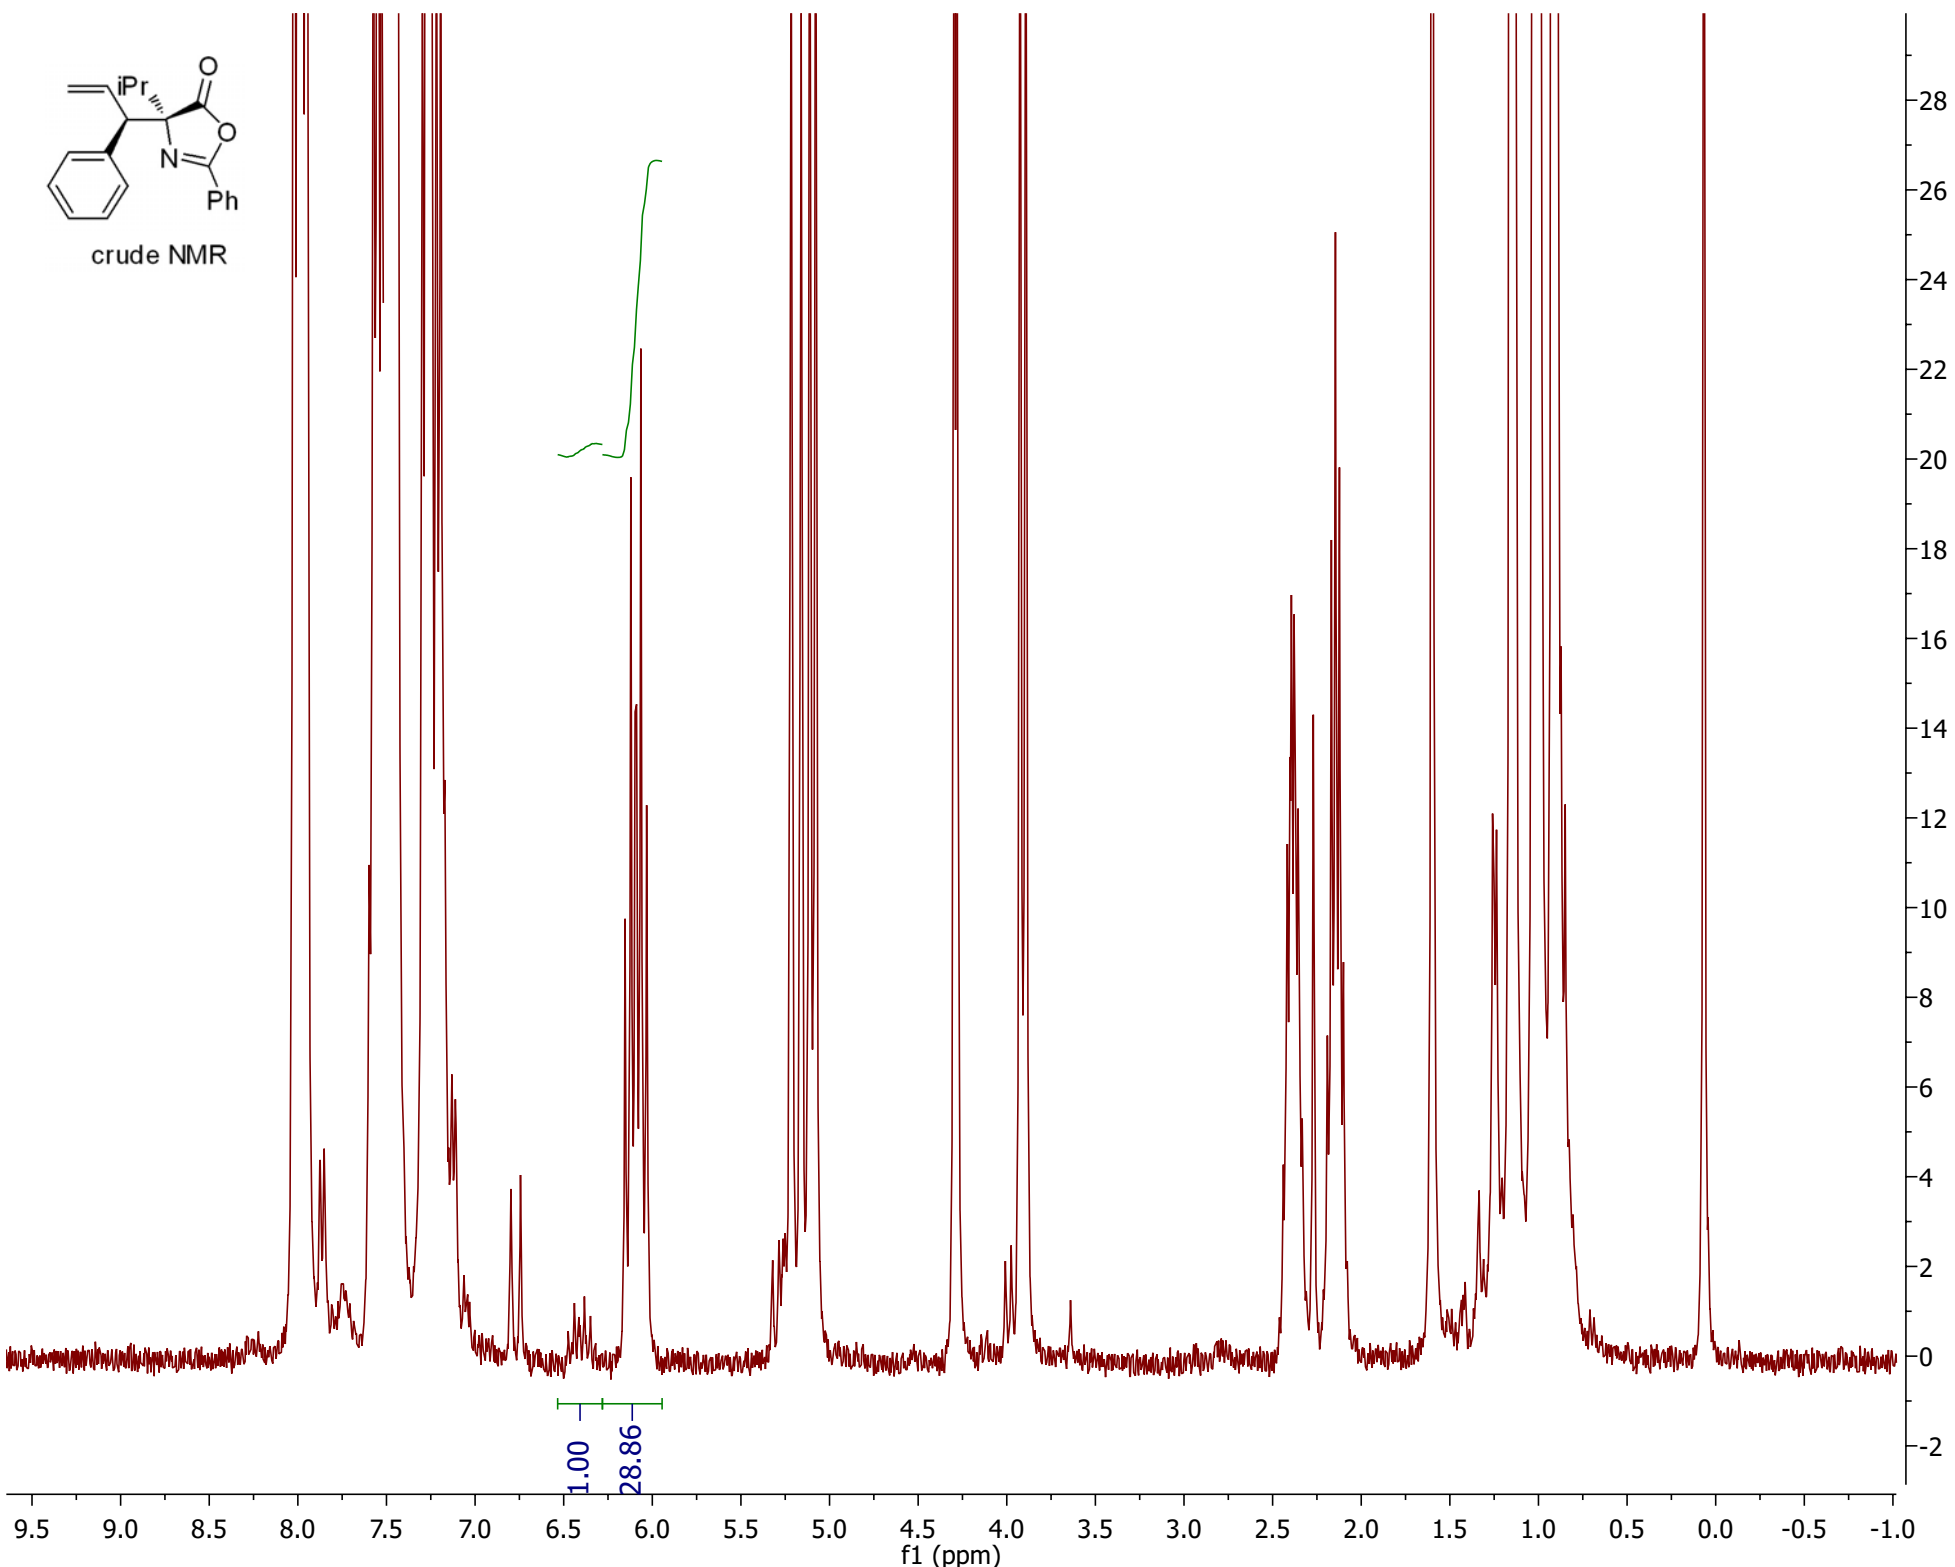

S54

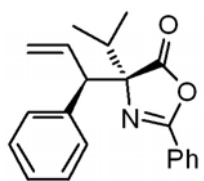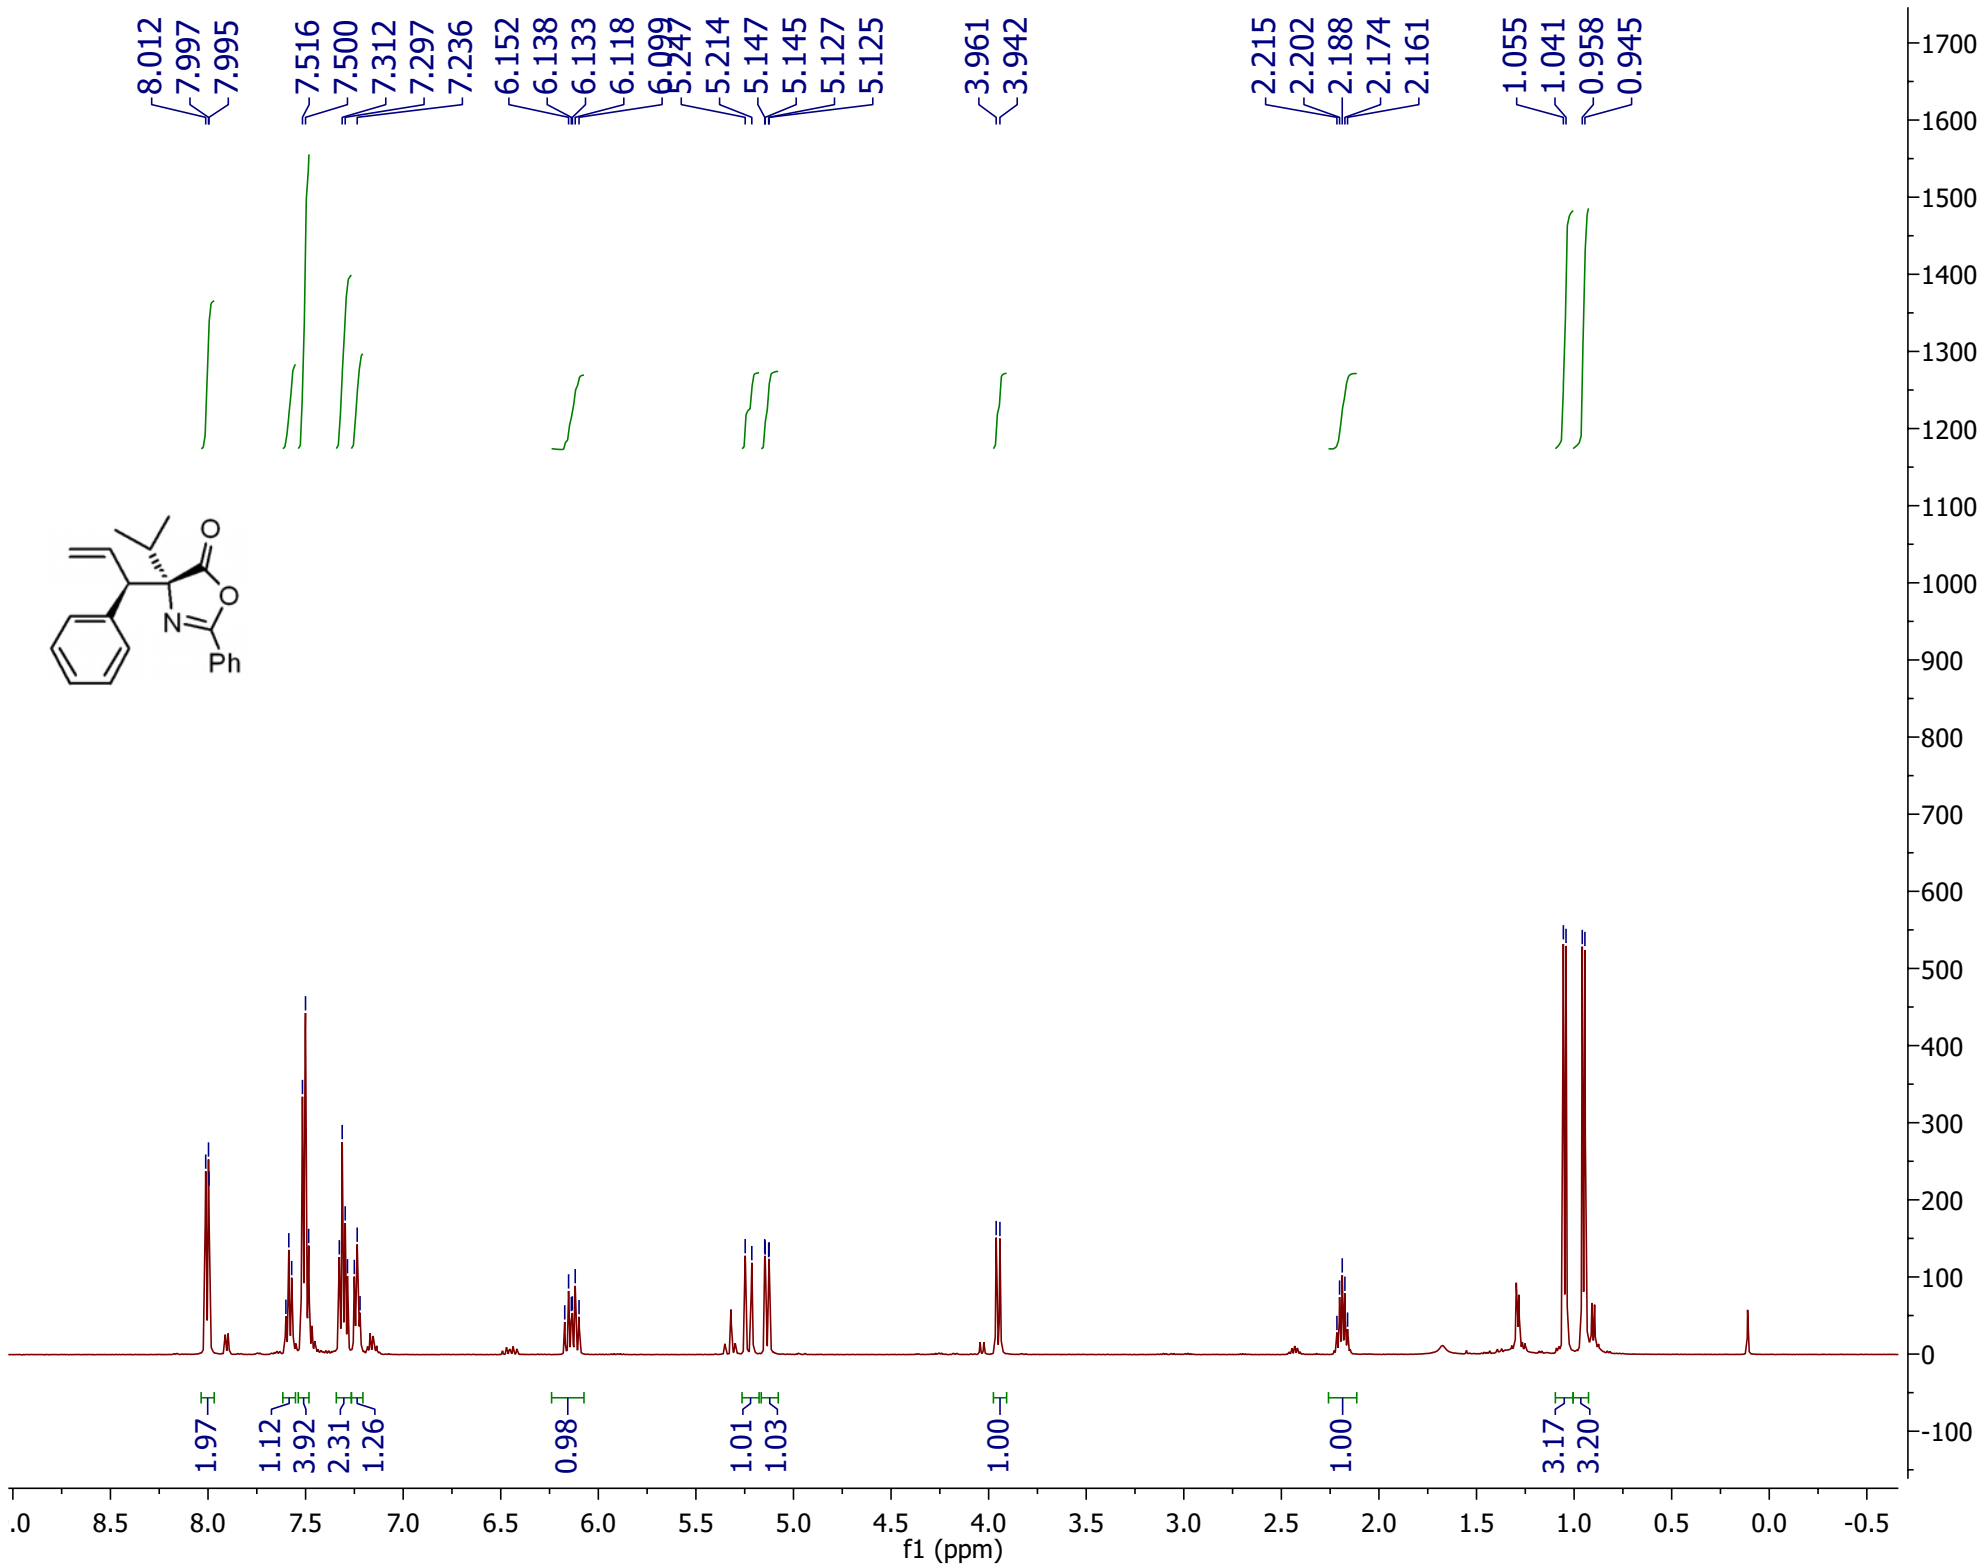

S55

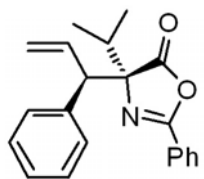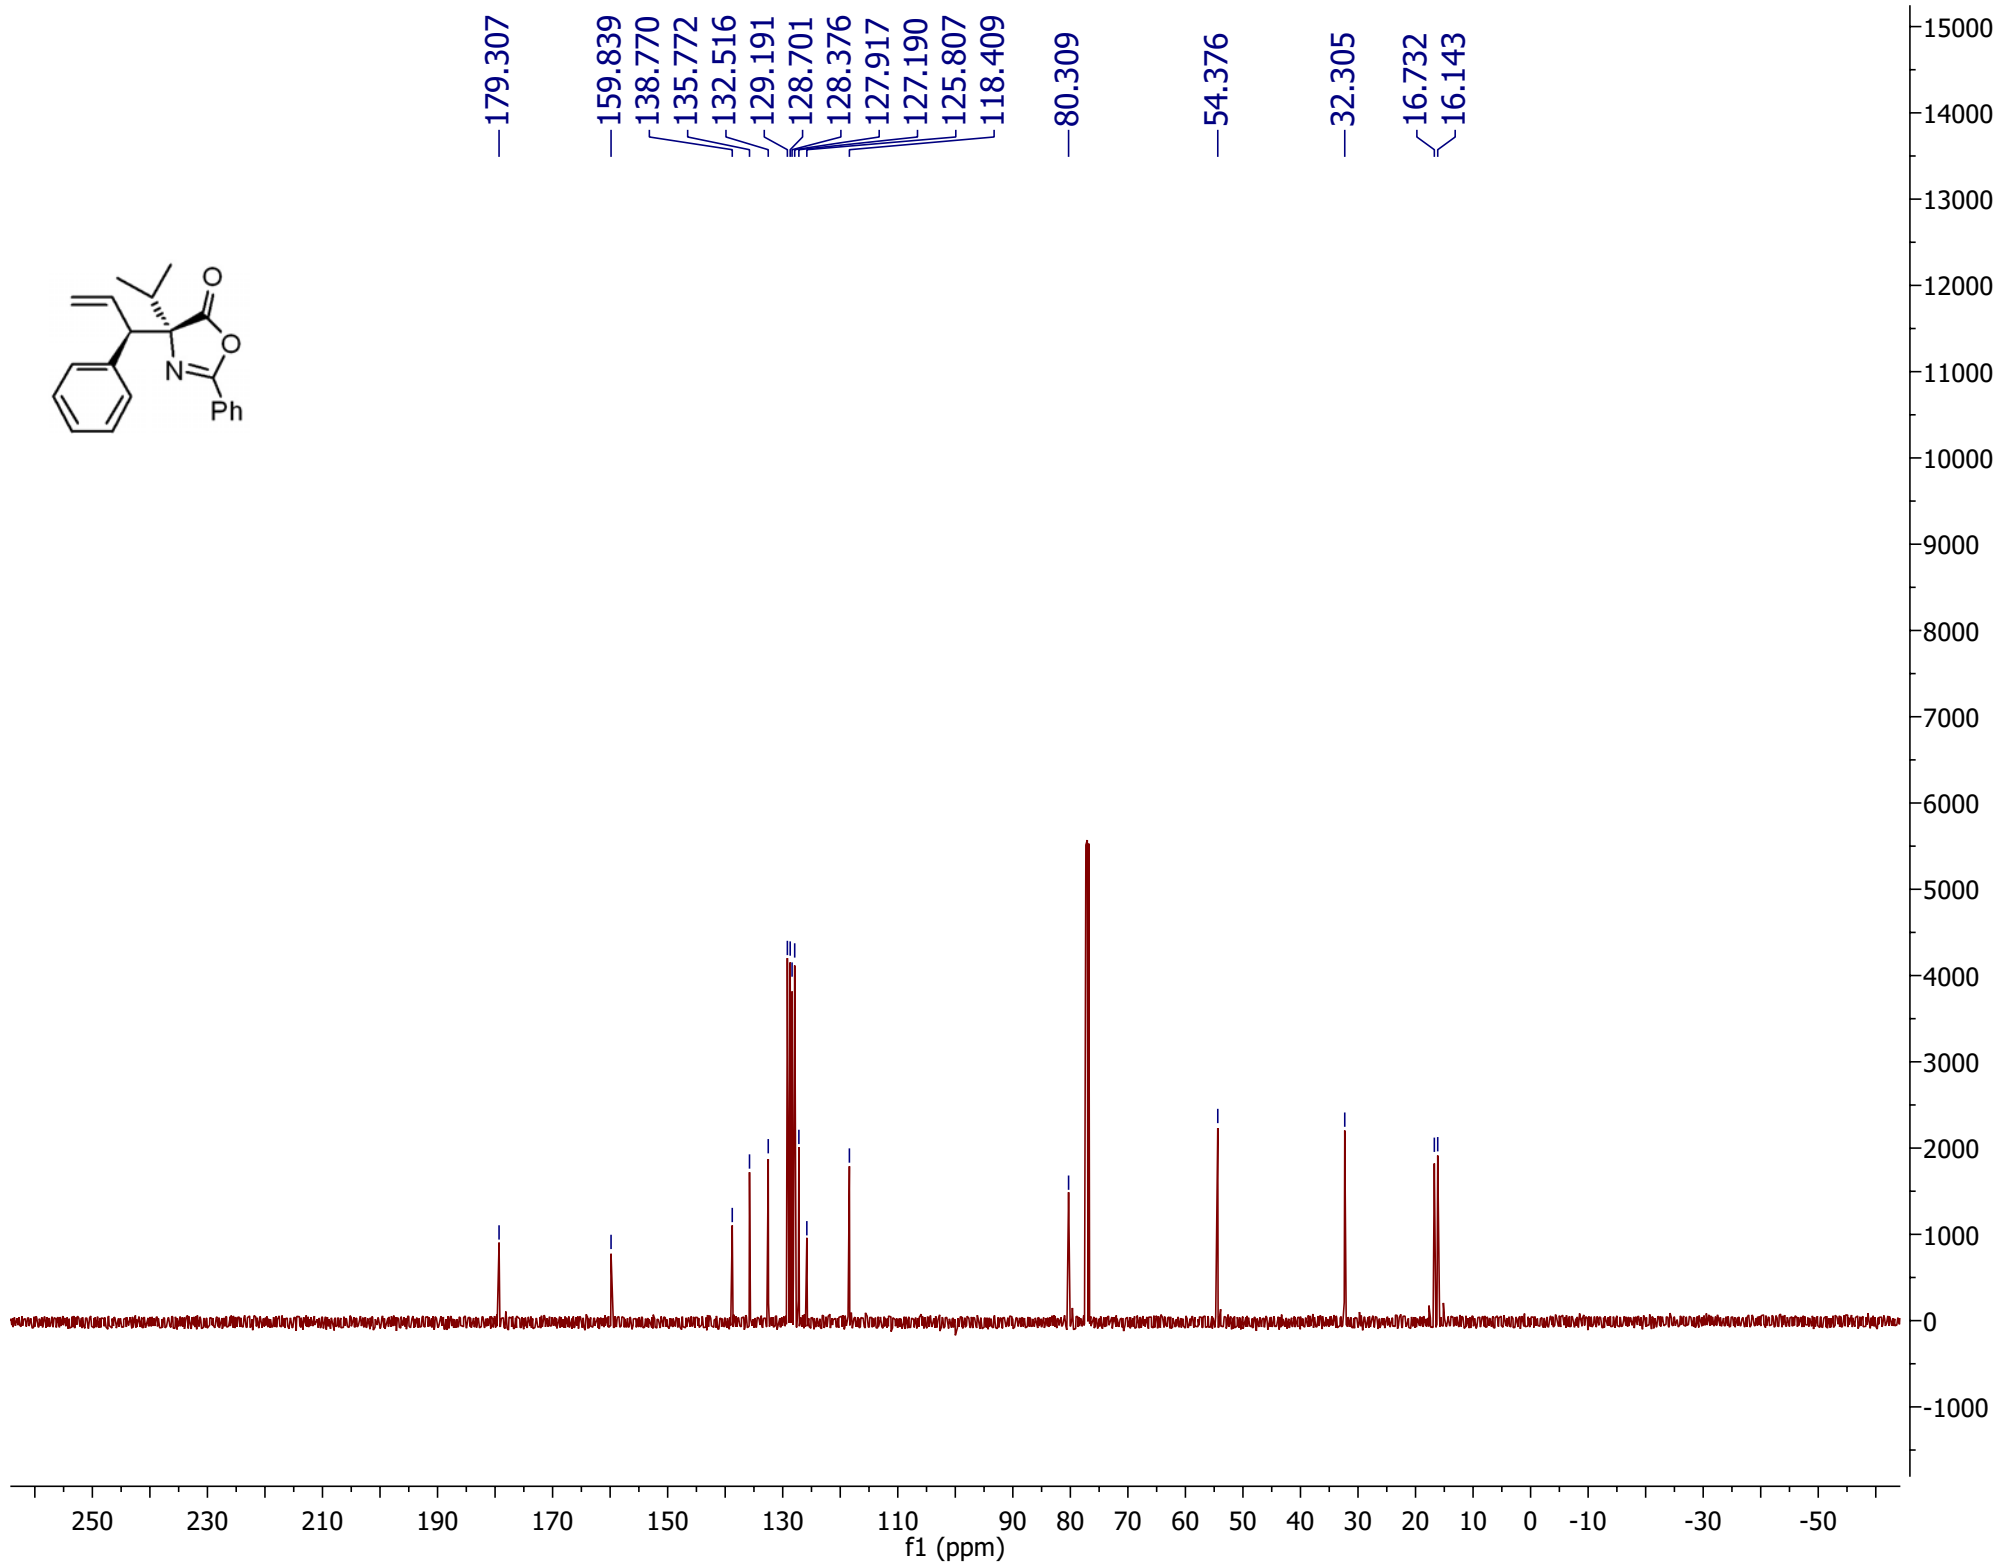



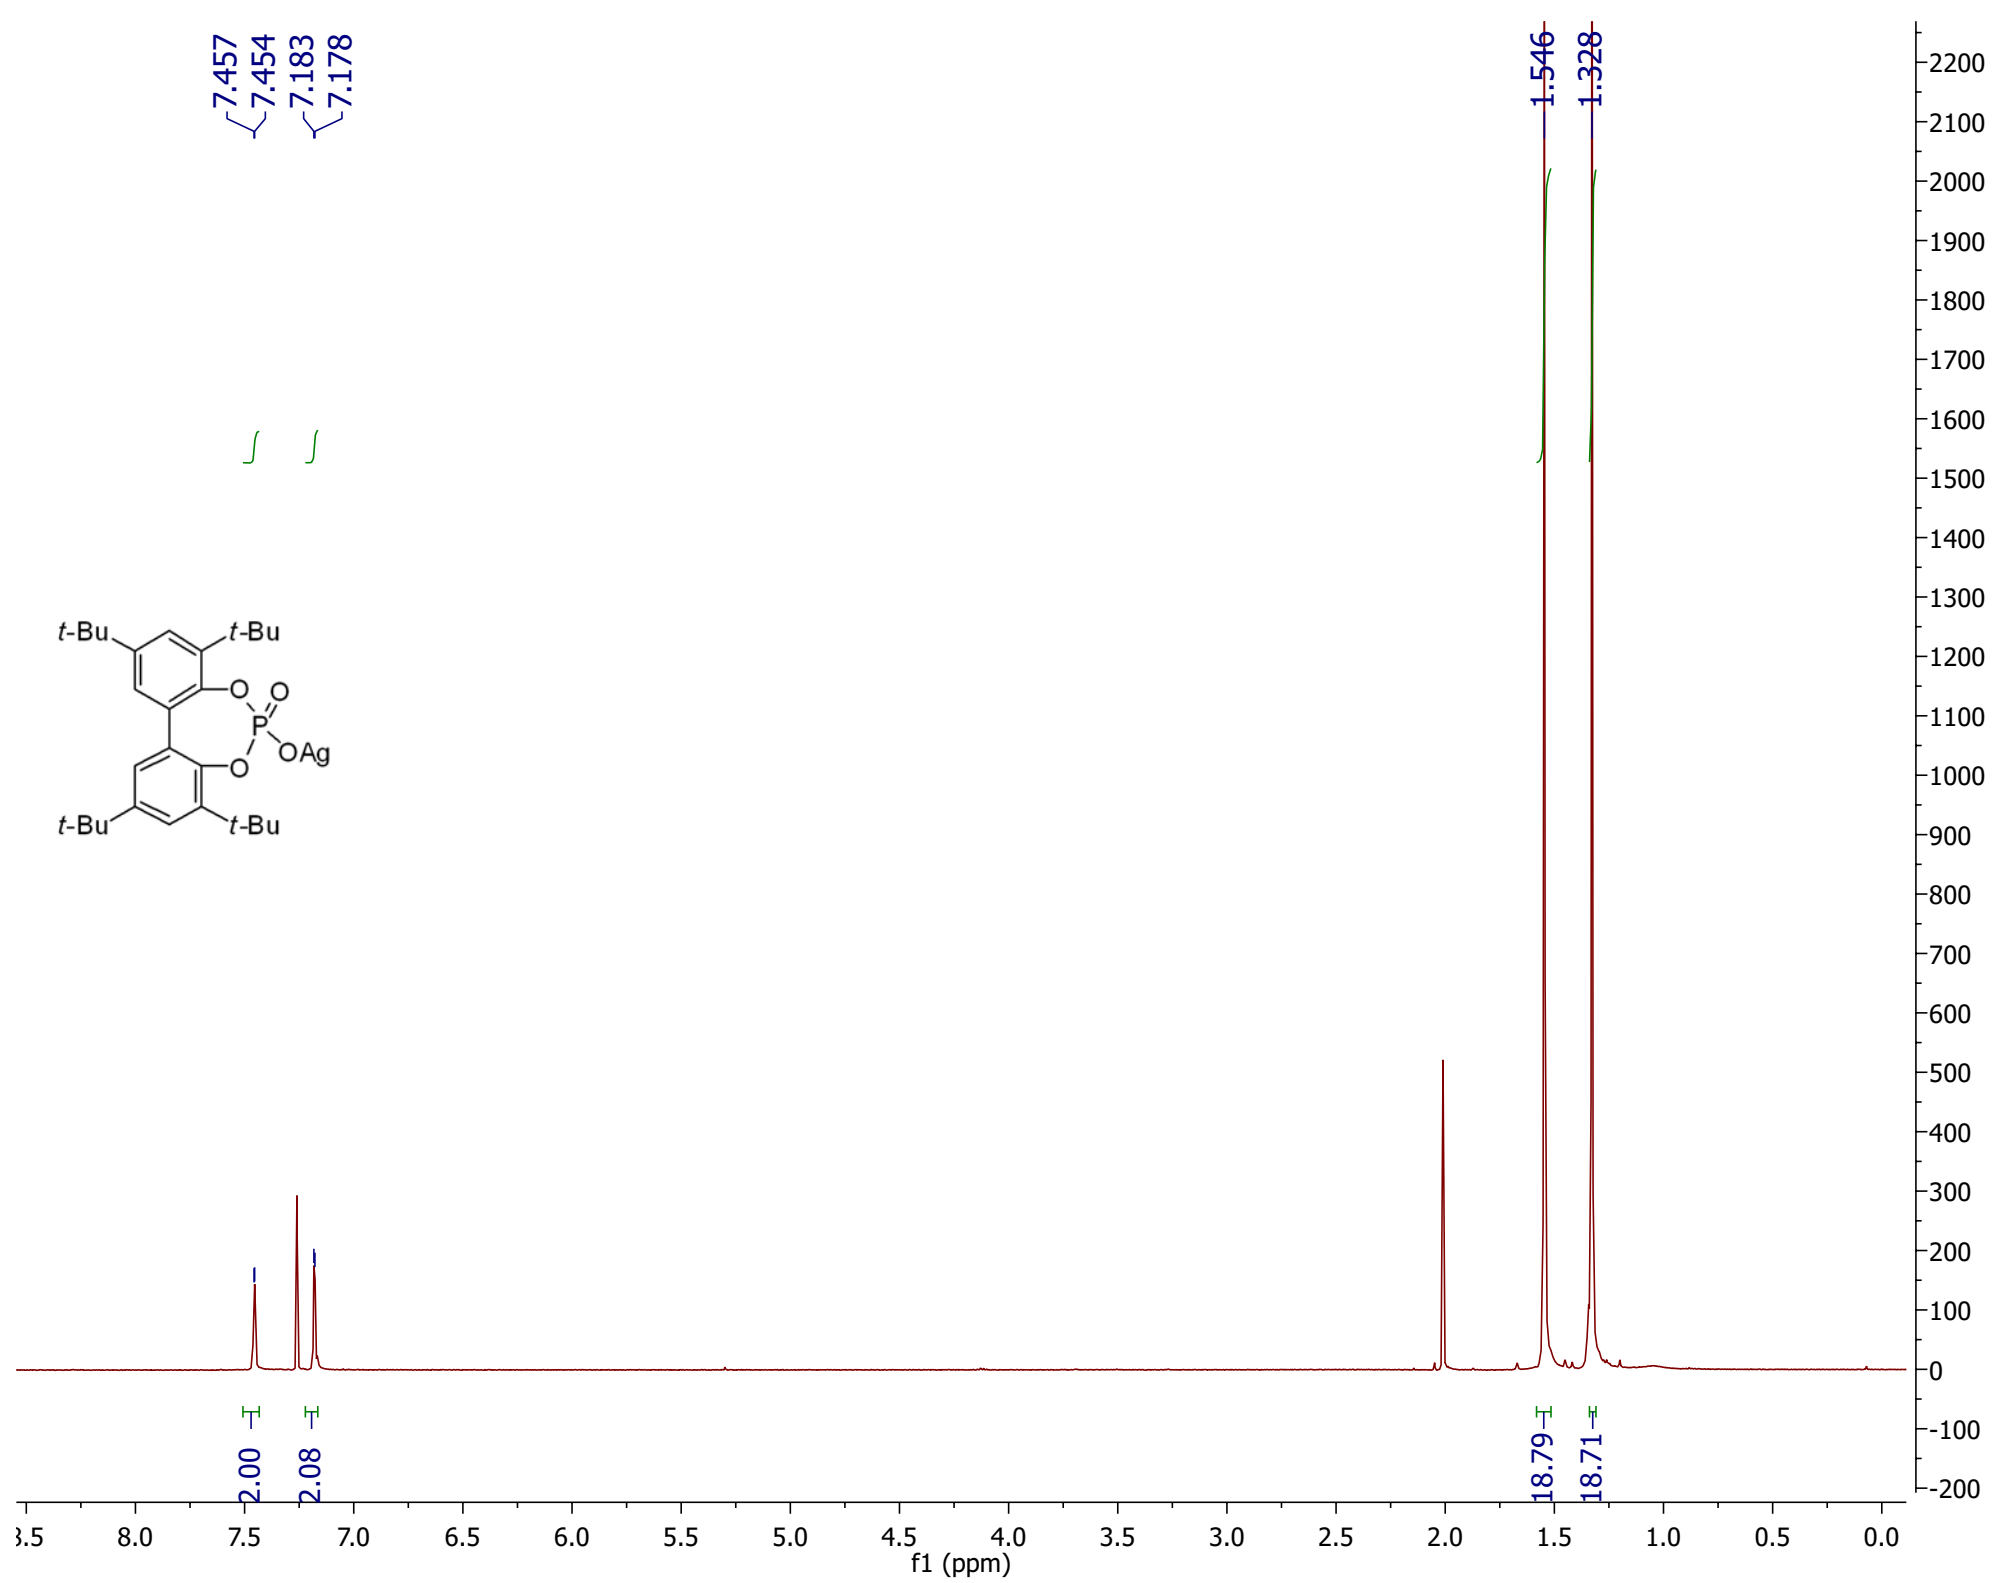

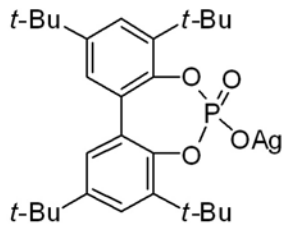

146.892  
139.604  
139.572  
130.736  
126.455  
124.726

35.477  
34.627  
31.516  
31.461

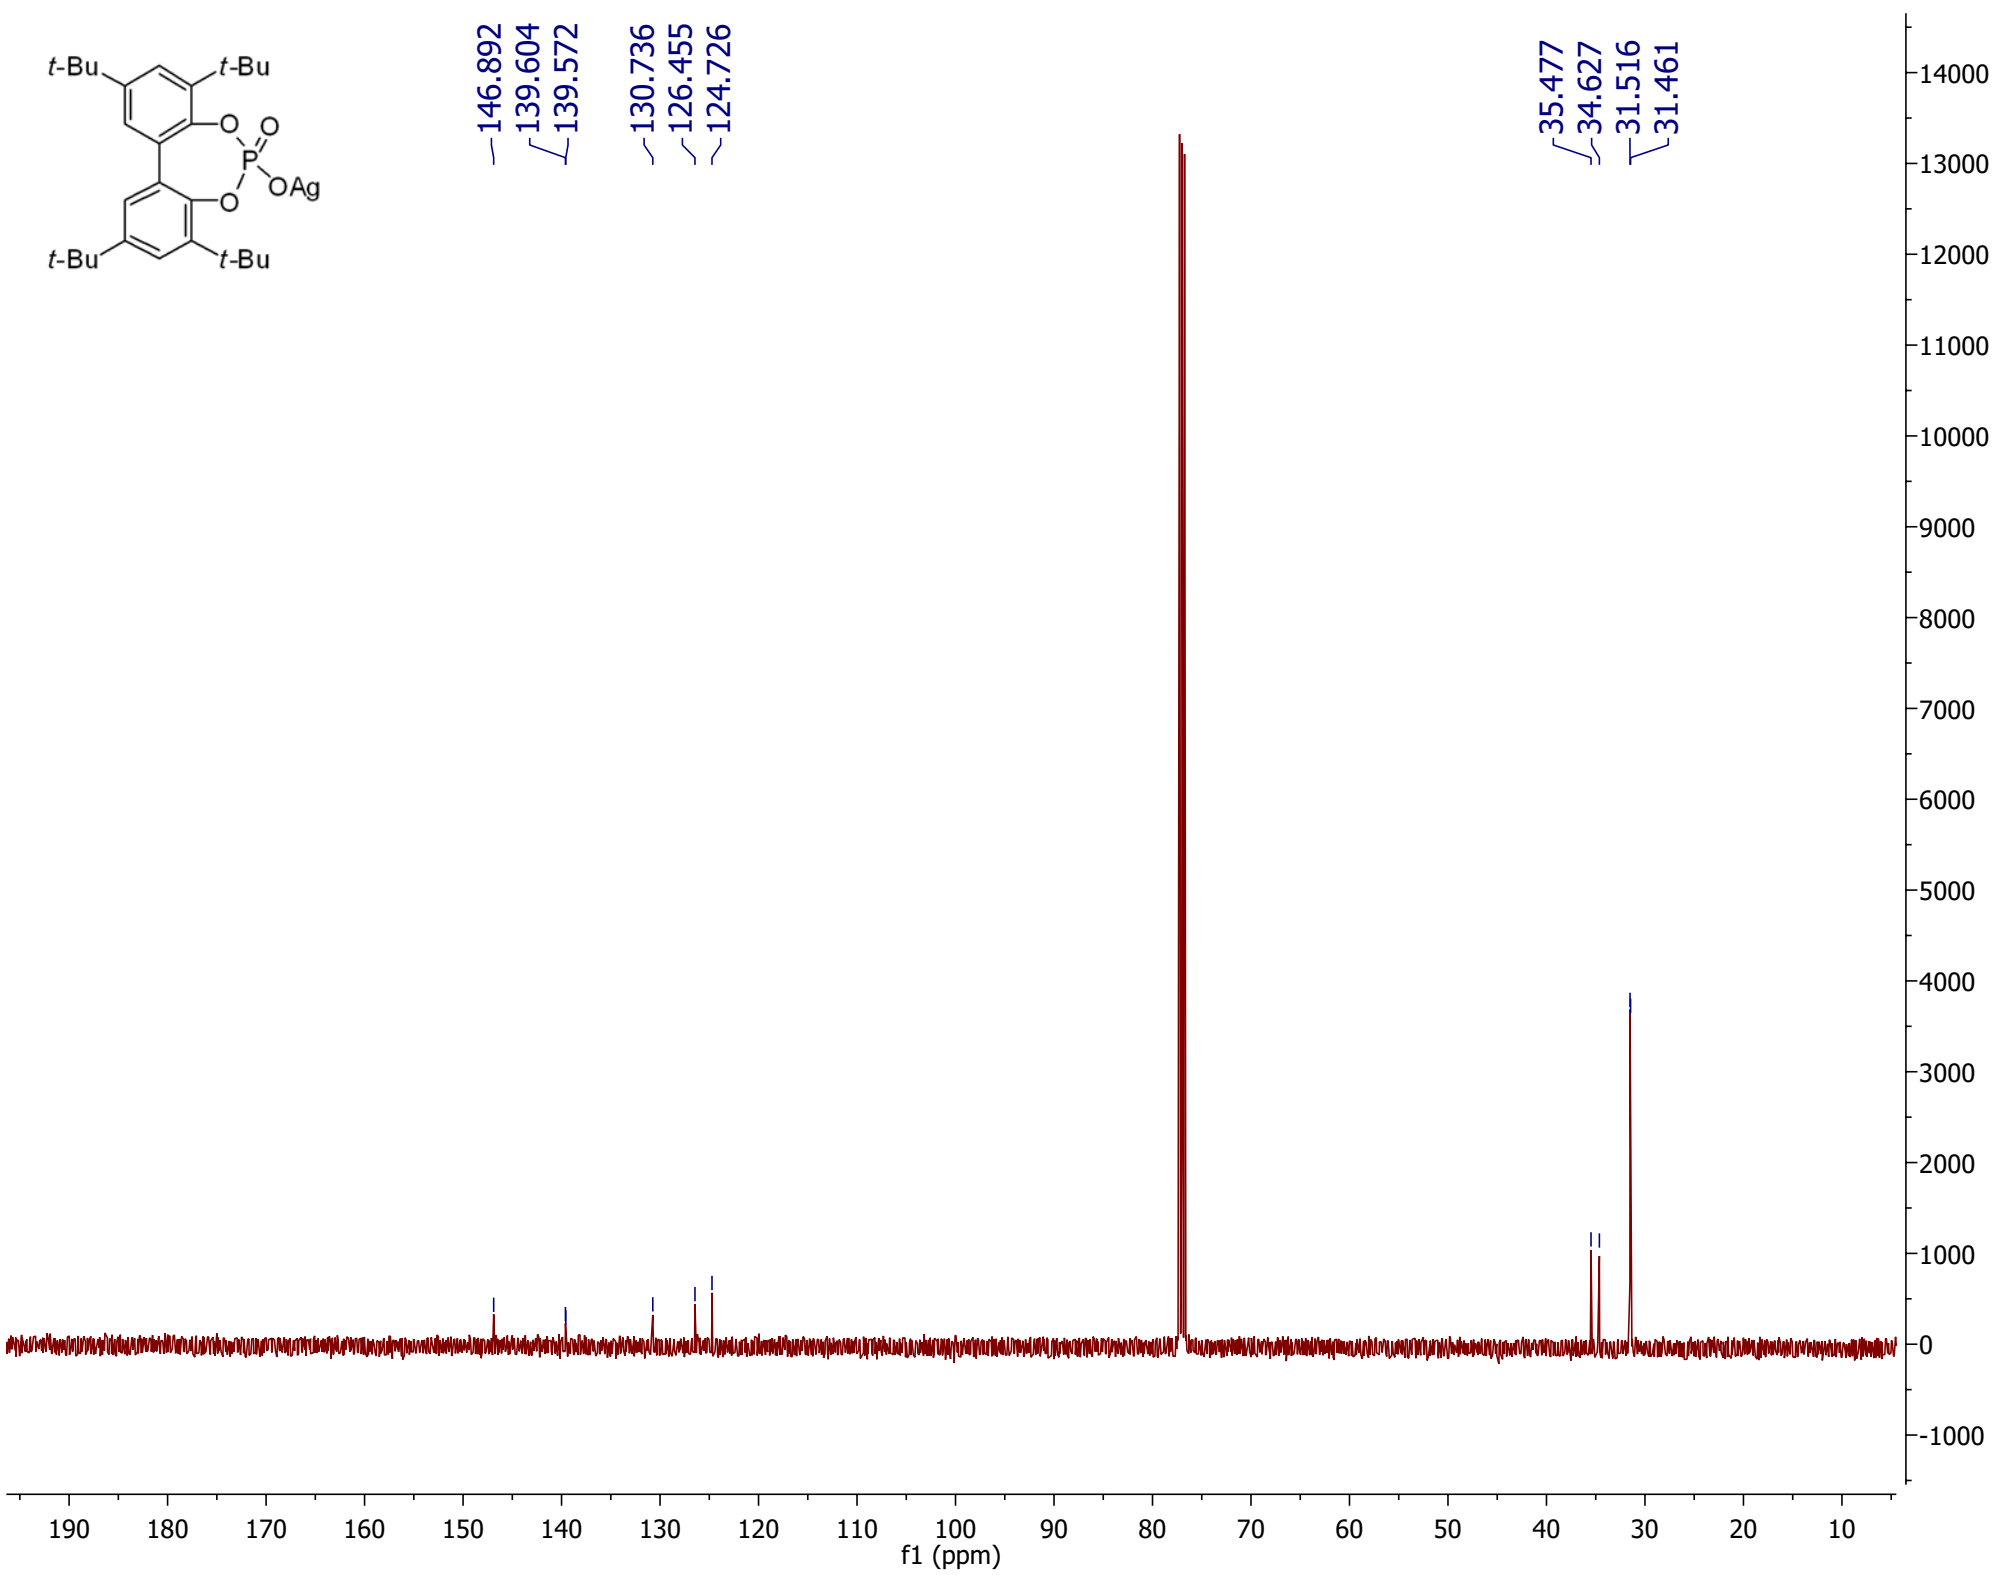

8.057  
8.043  
8.040  
7.630  
7.626  
7.551  
7.536  
7.455  
7.439  
5.919  
5.905  
5.900  
5.886  
5.868  
5.238  
5.204  
5.159  
5.139  
5.137

3.696  
3.677

1.388  
1.376

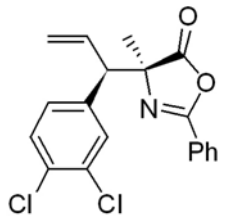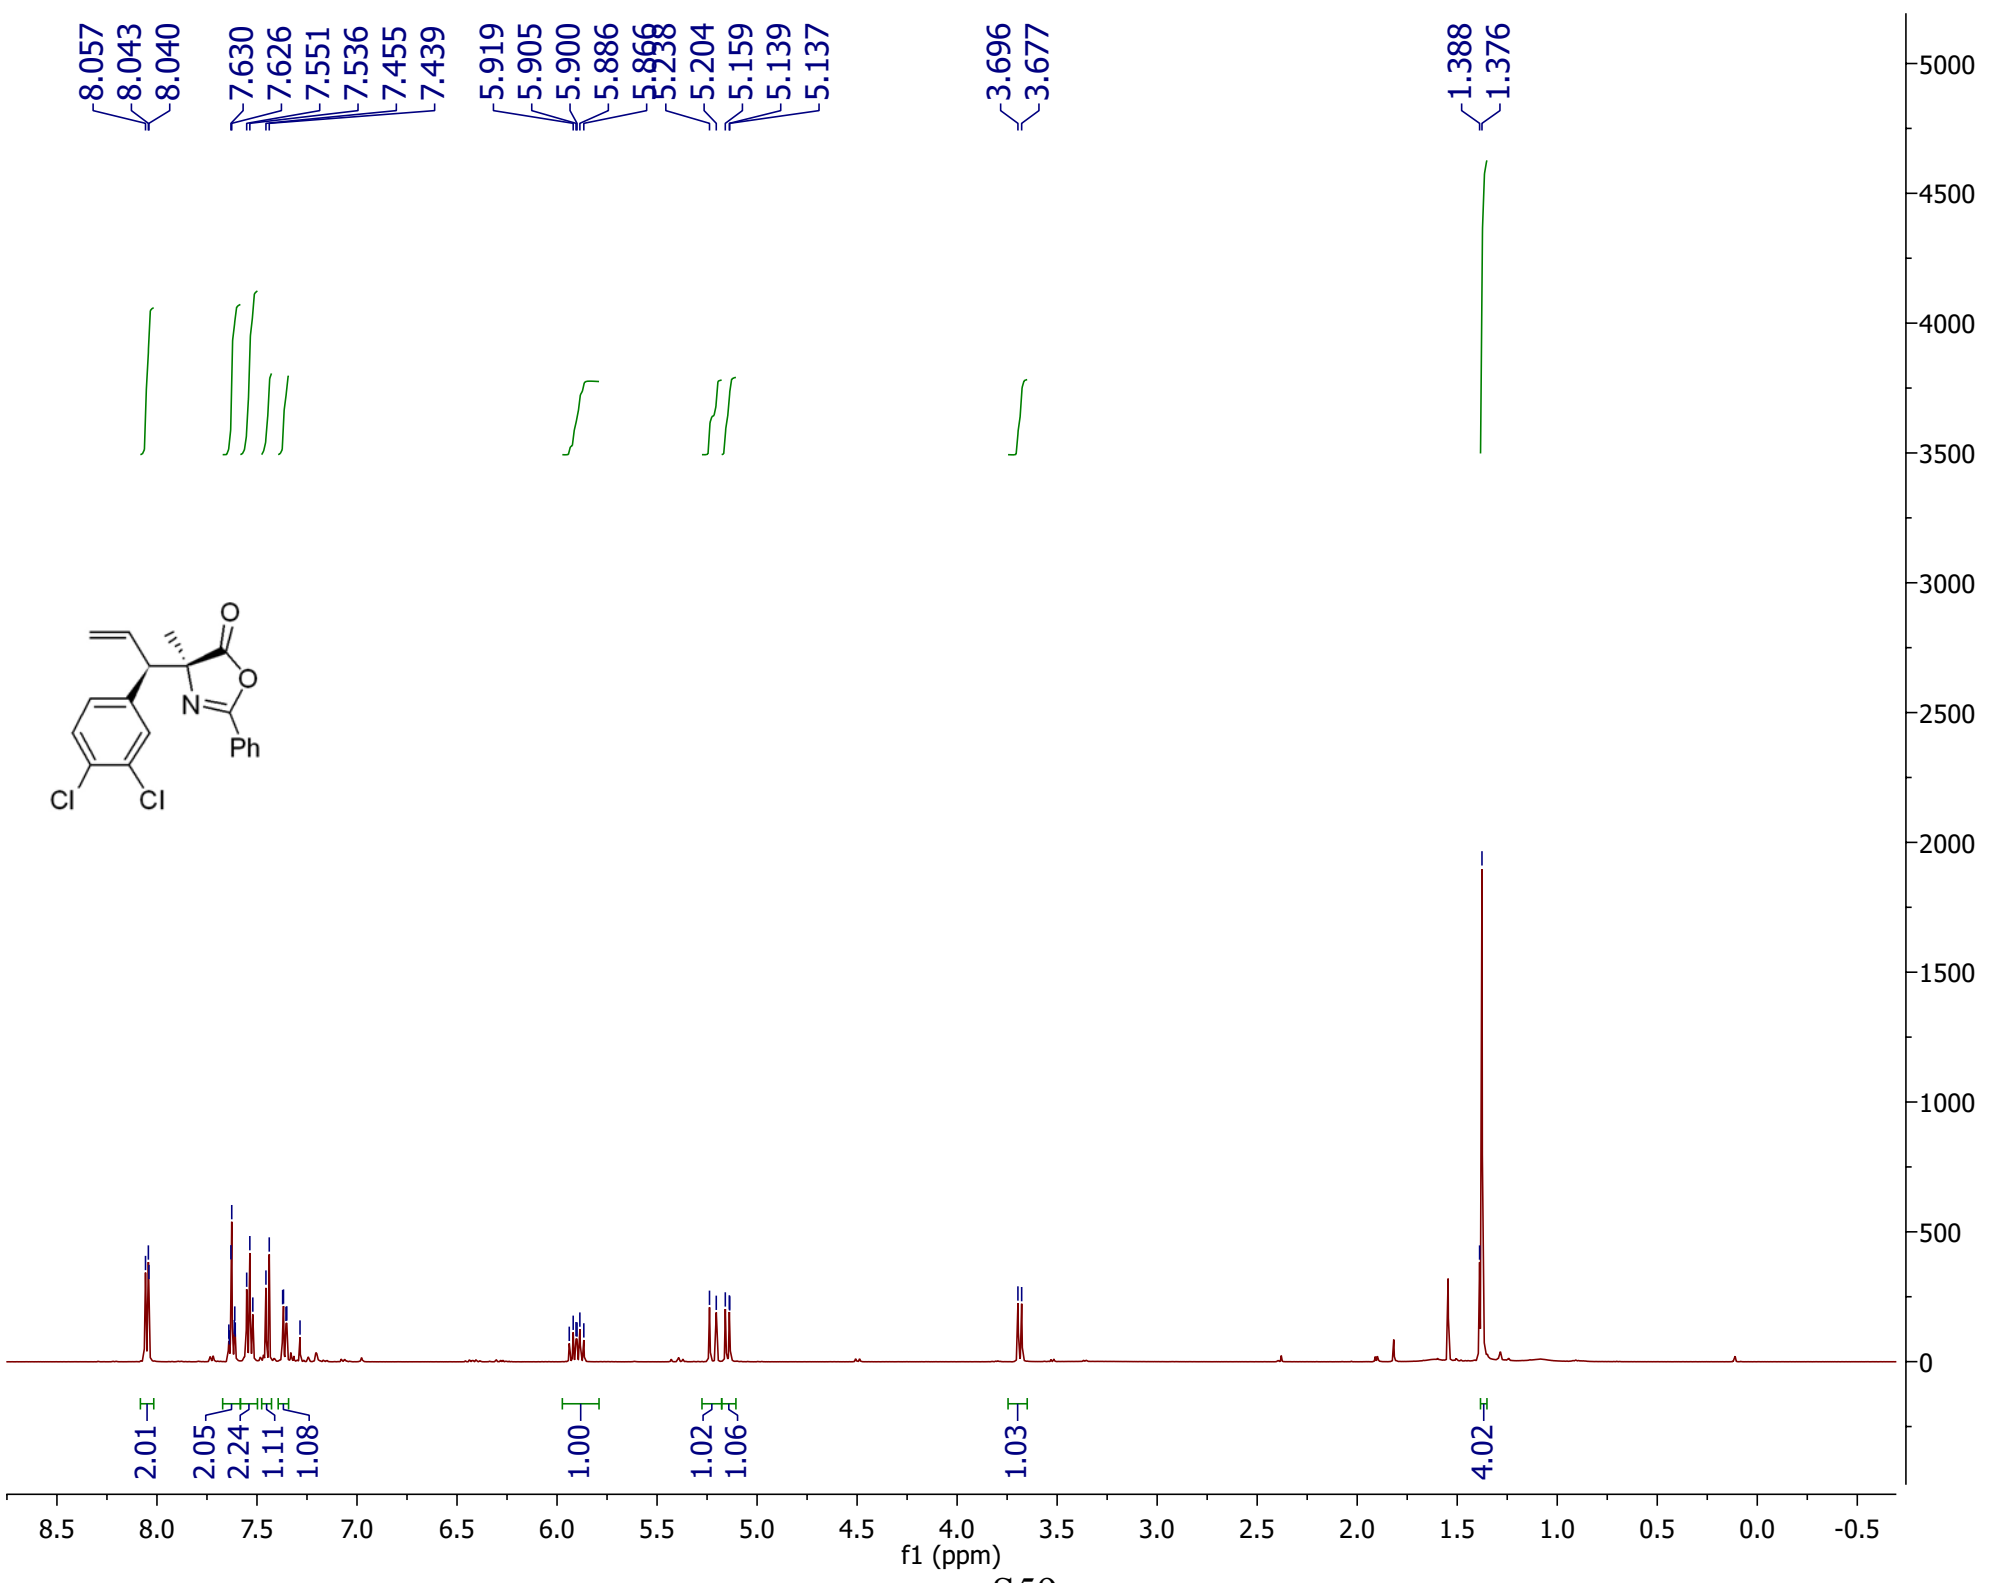

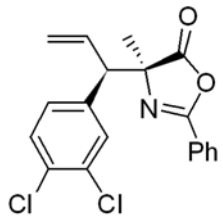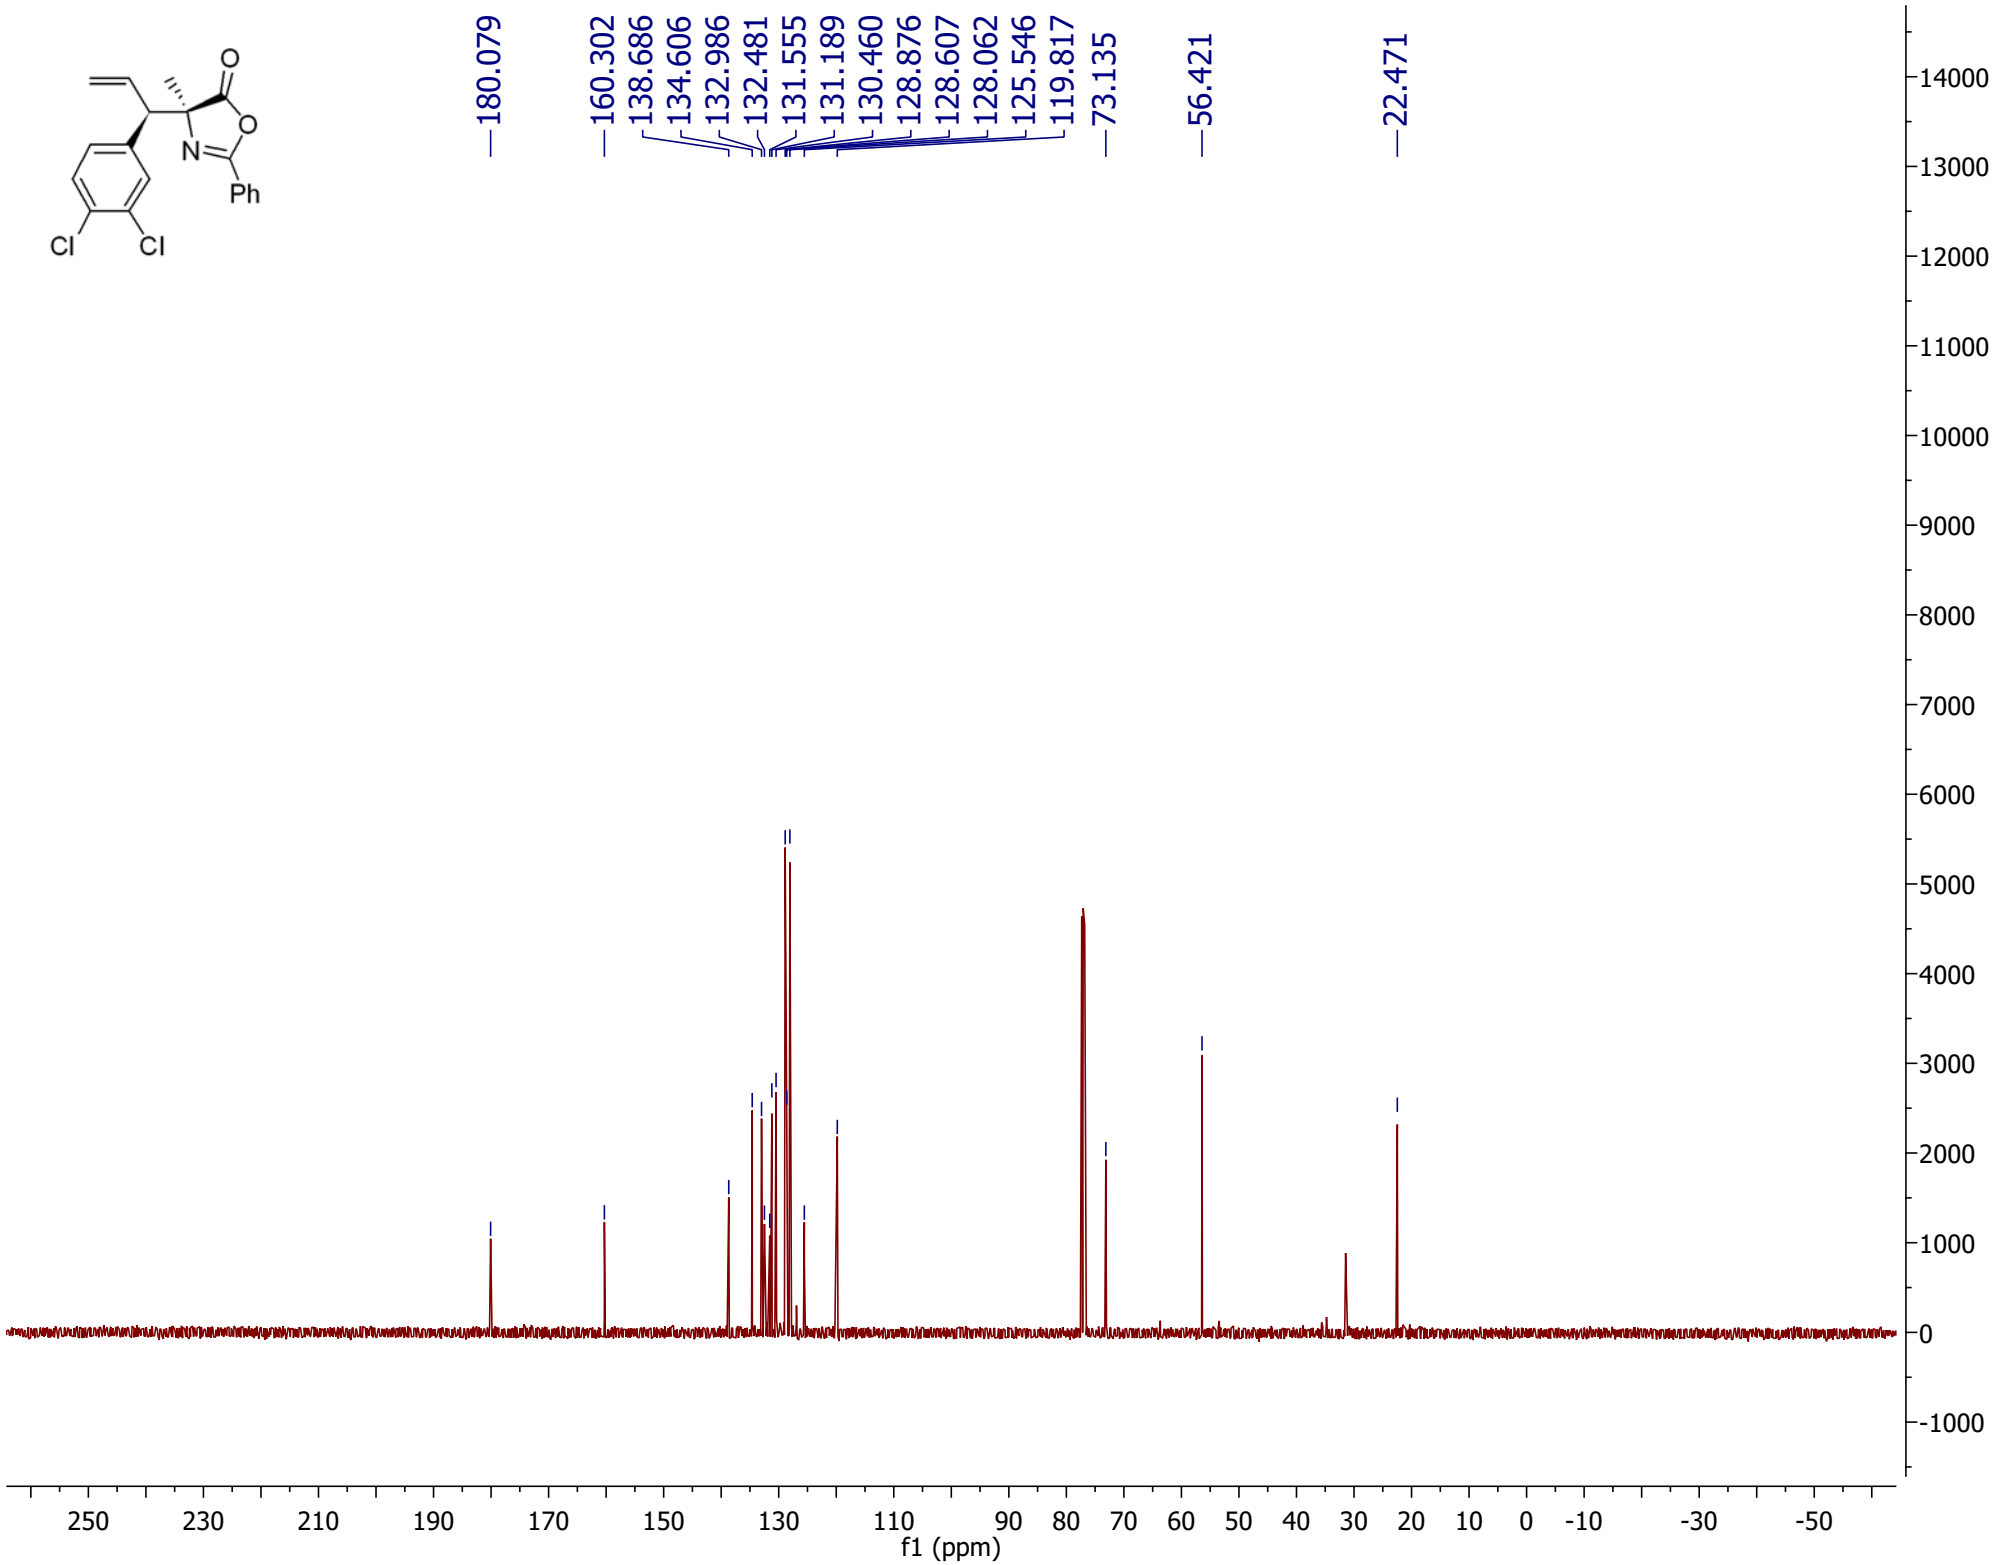

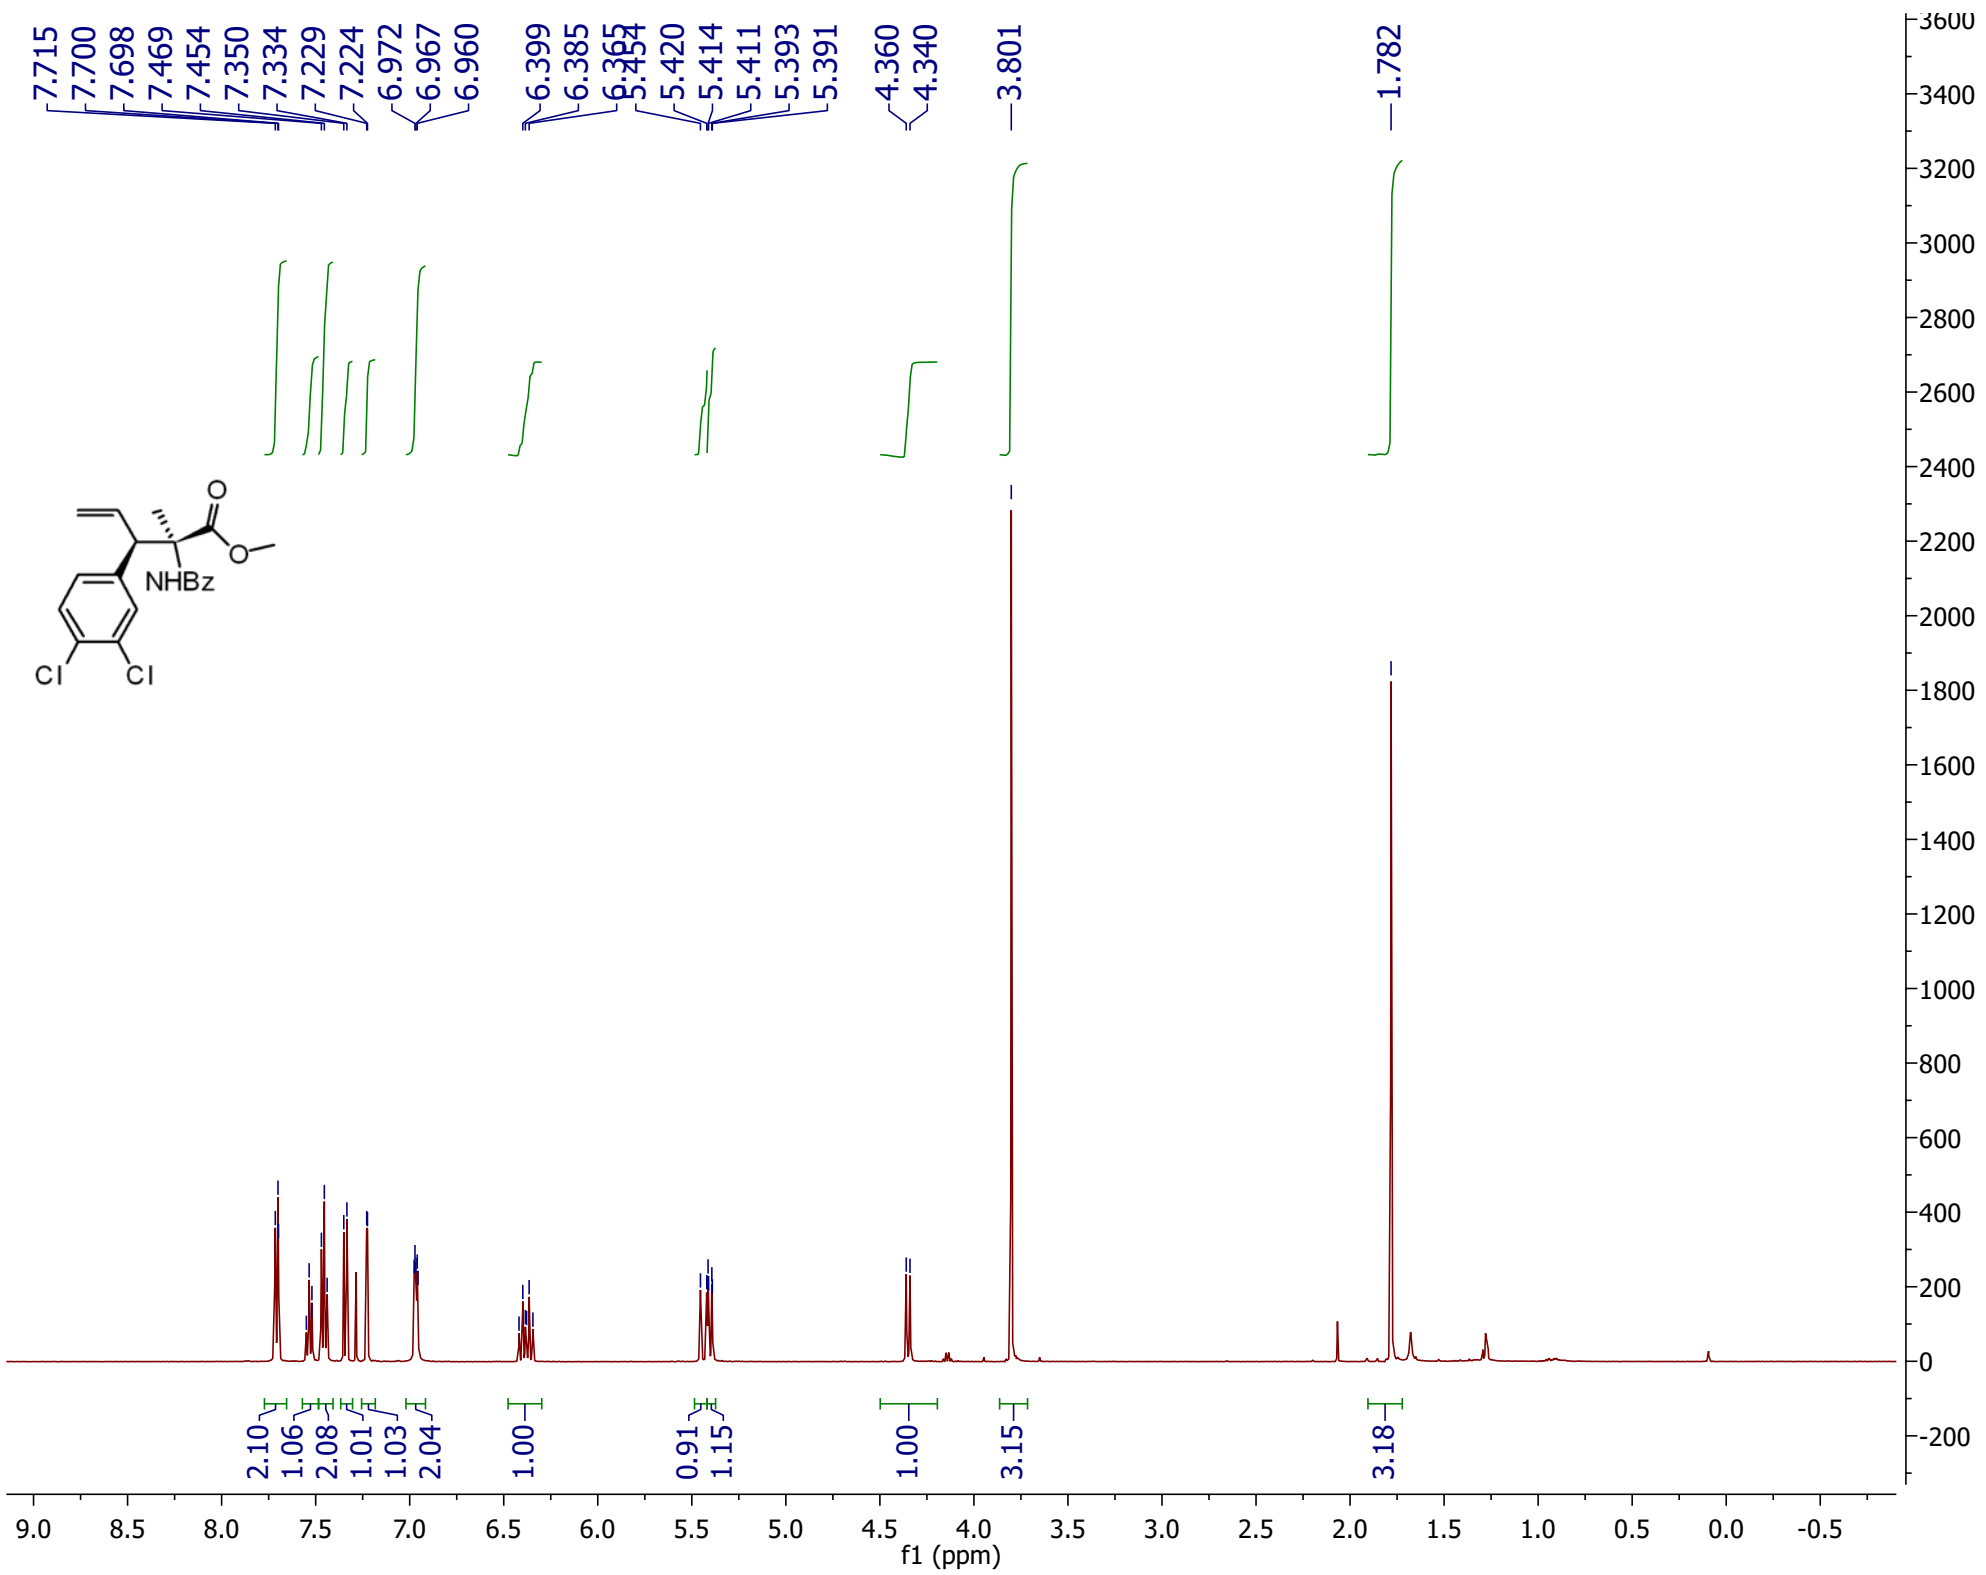

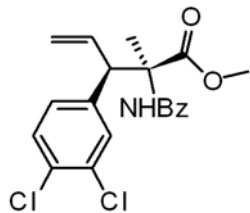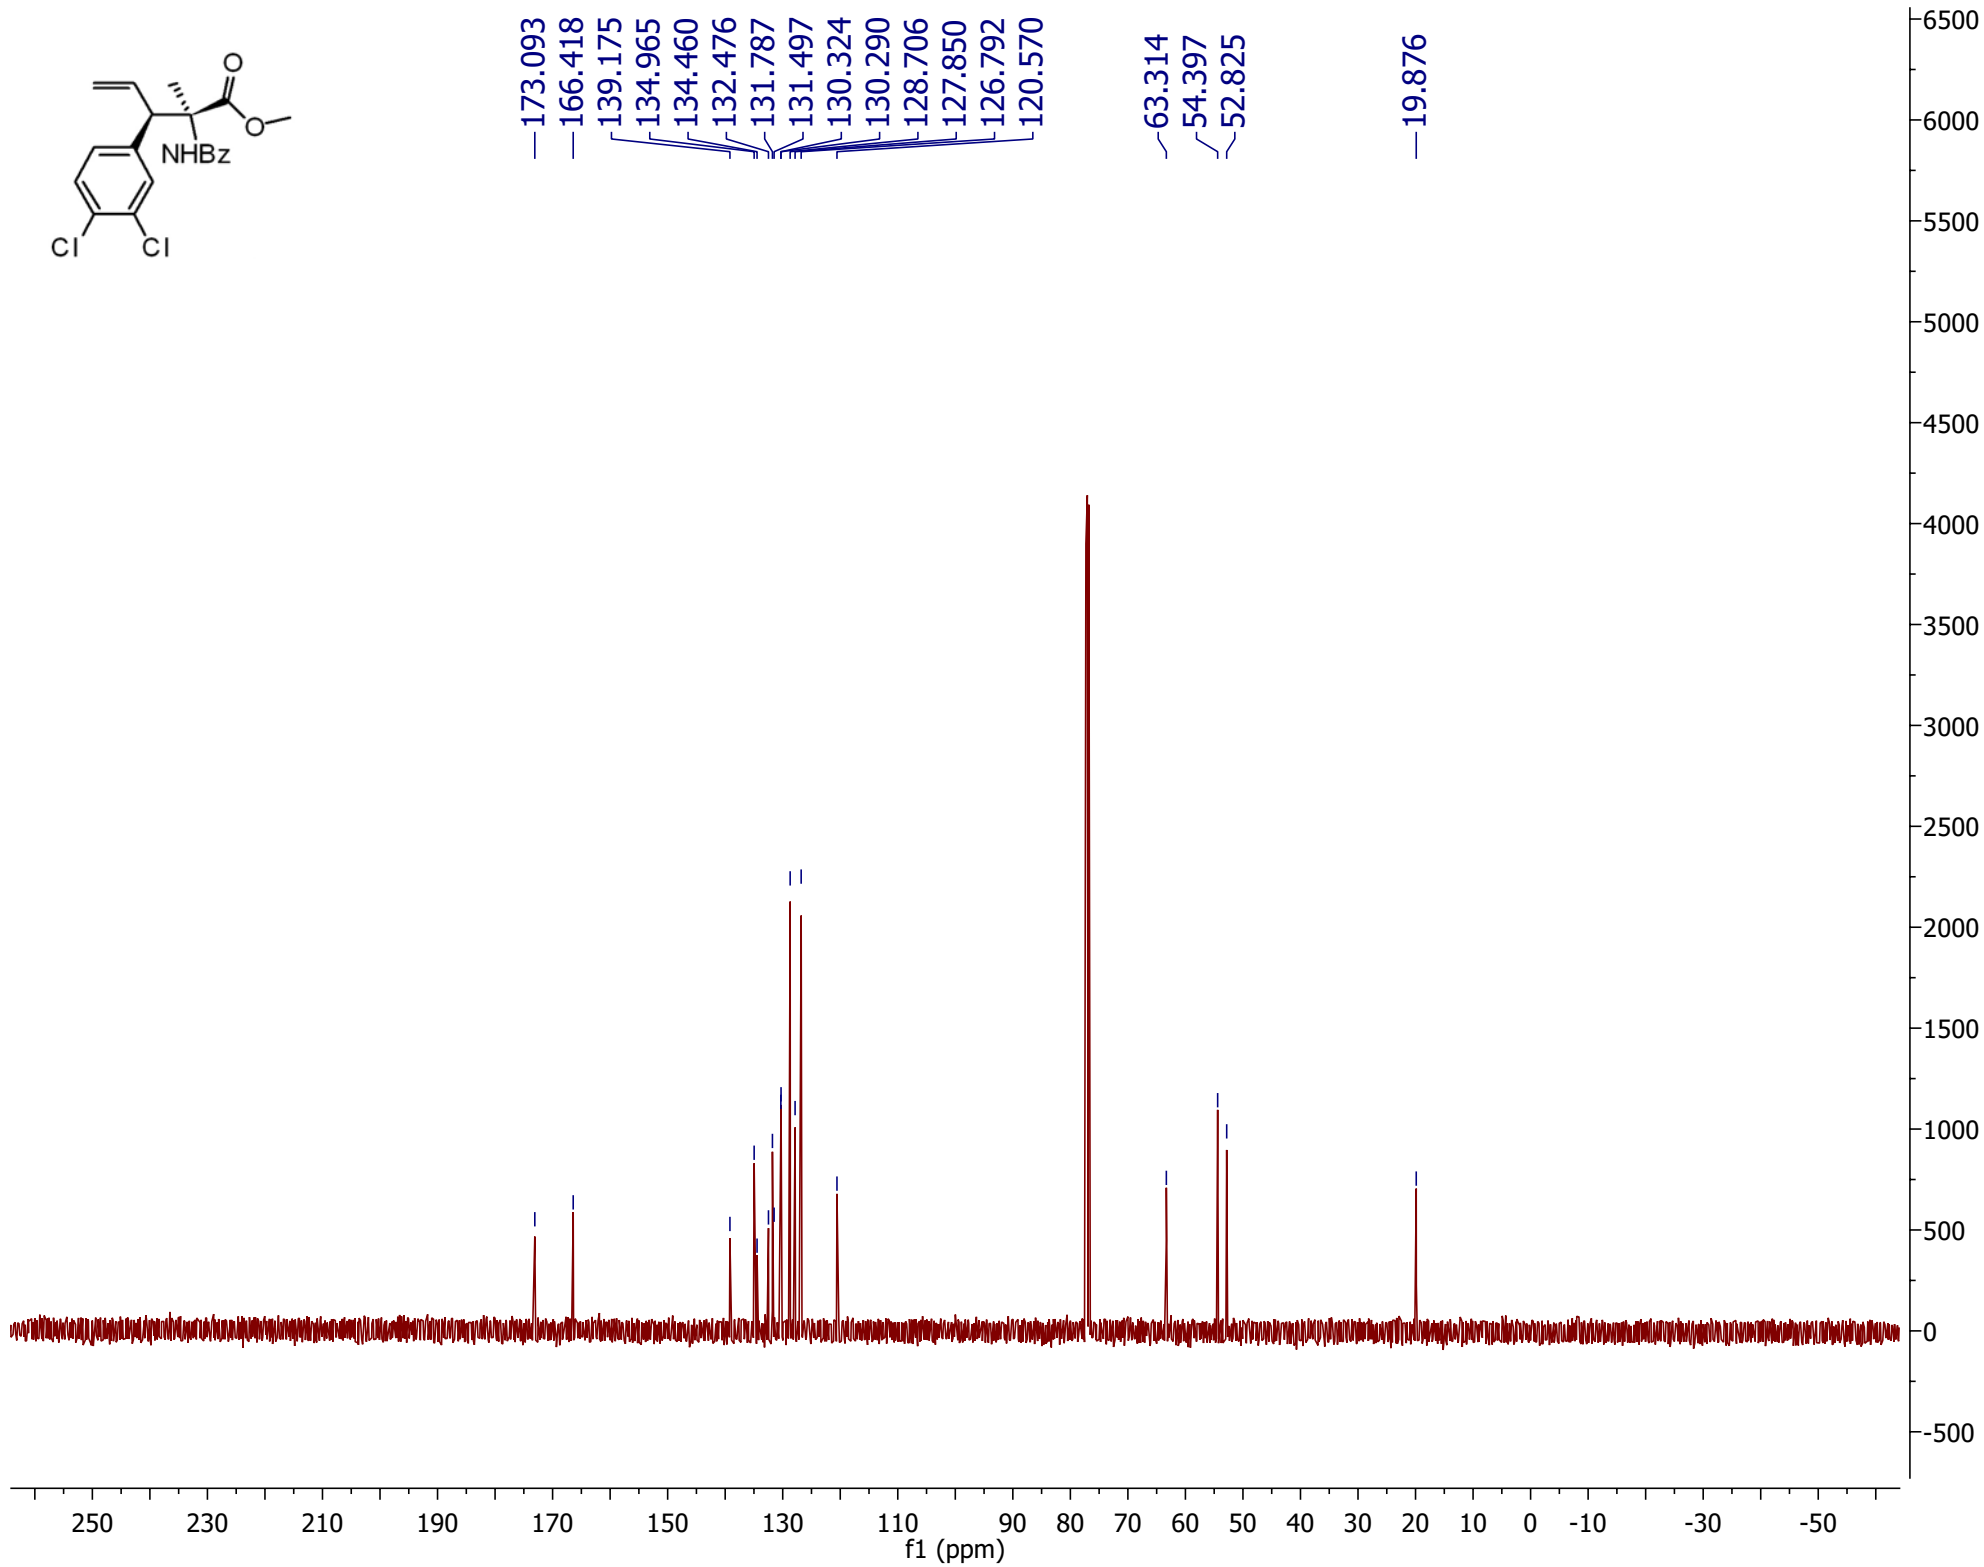

7.712  
7.696  
7.666  
7.651  
7.525  
7.456  
7.440  
7.425  
7.336  
7.320  
7.285  
7.261  
7.244  
7.016  
7.012  
6.868  
6.809  
6.805  
6.792

4.007  
4.002  
3.995  
3.988  
3.982  
3.974  
3.723  
3.712  
3.705  
3.693  
3.685  
2.512  
2.497  
2.483  
2.462  
2.276  
2.266  
2.239  
2.212  
2.202

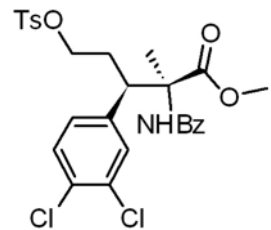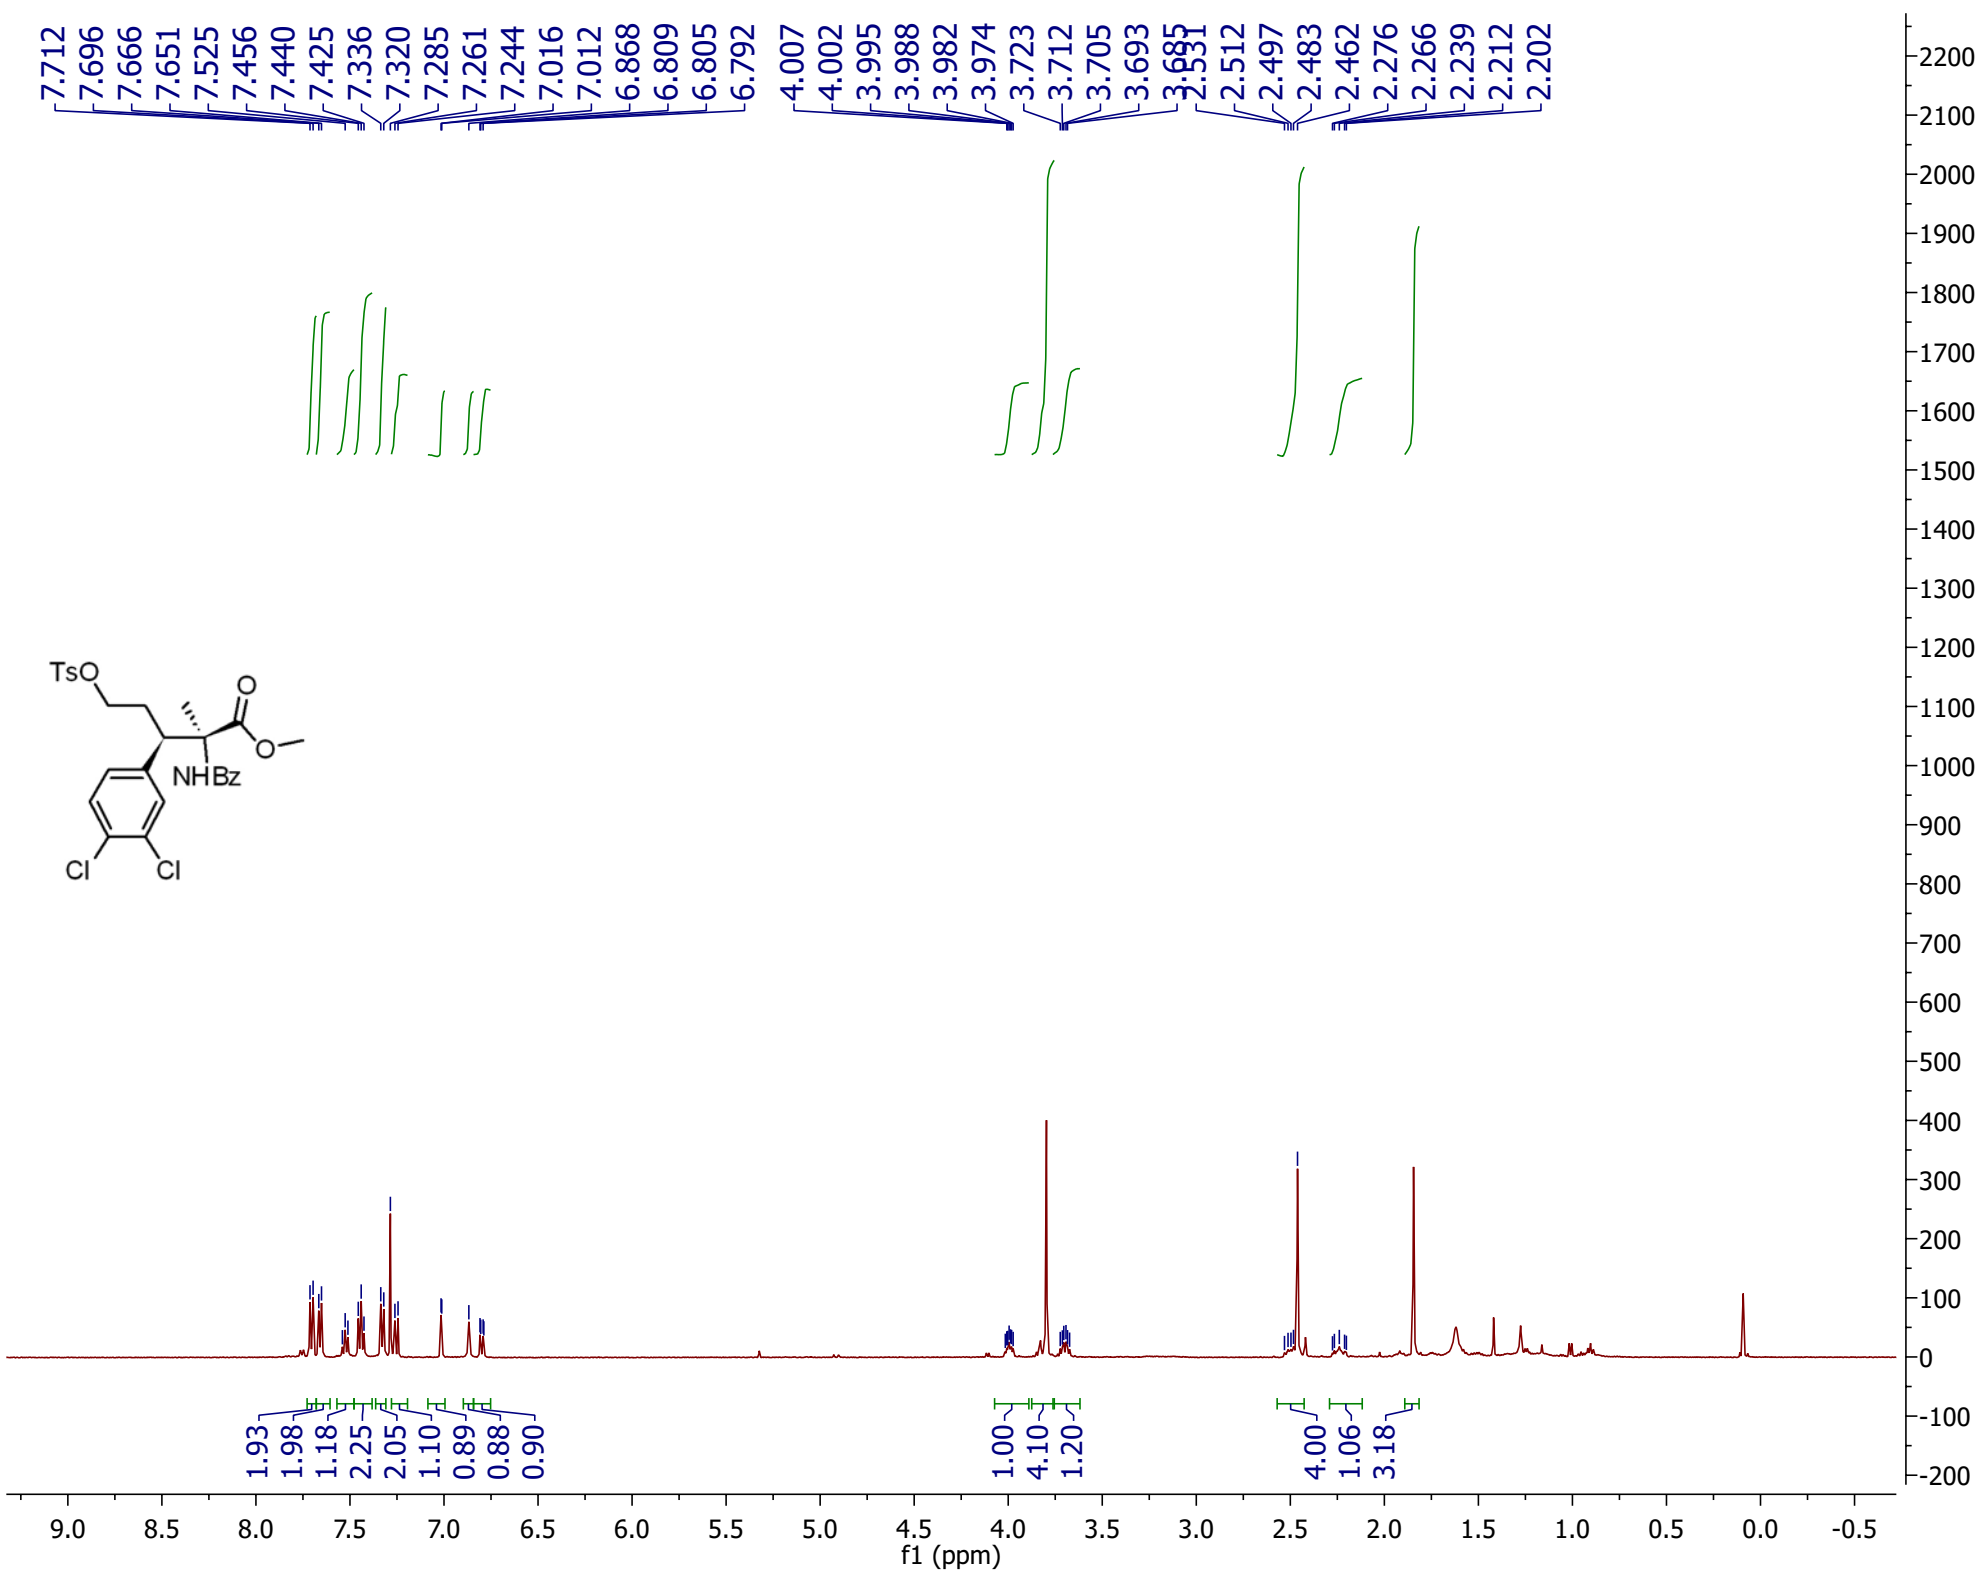

S63

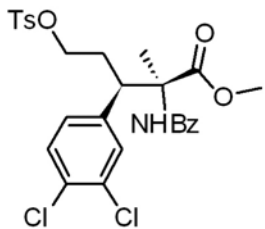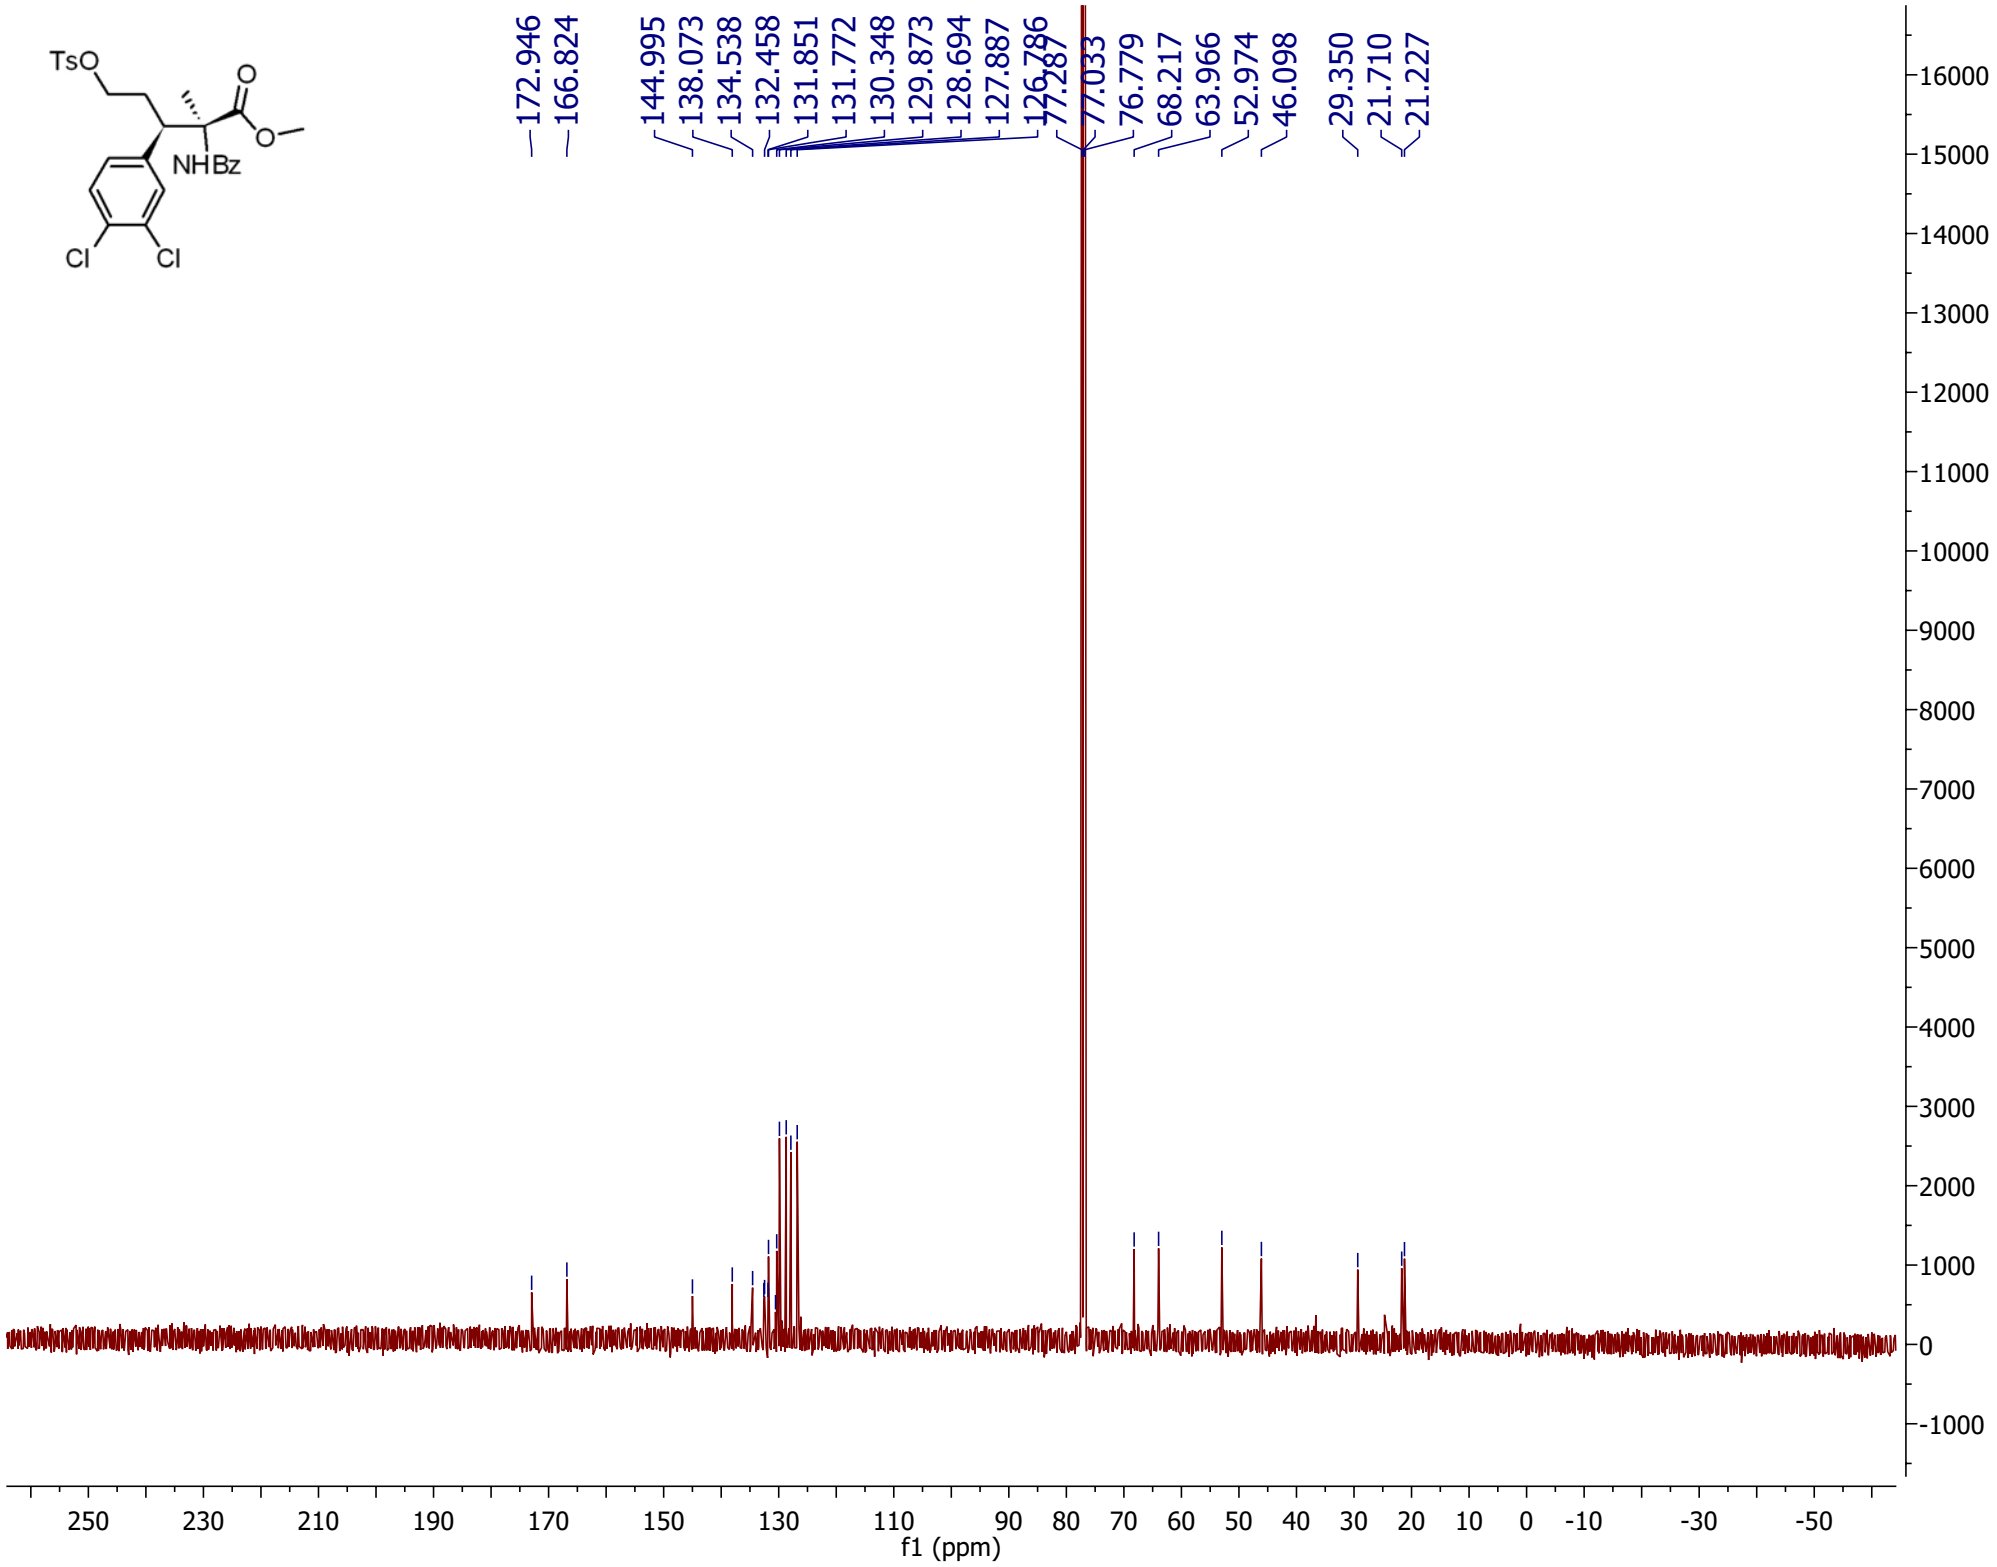

S64



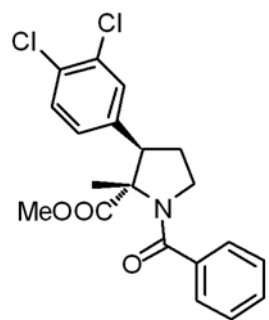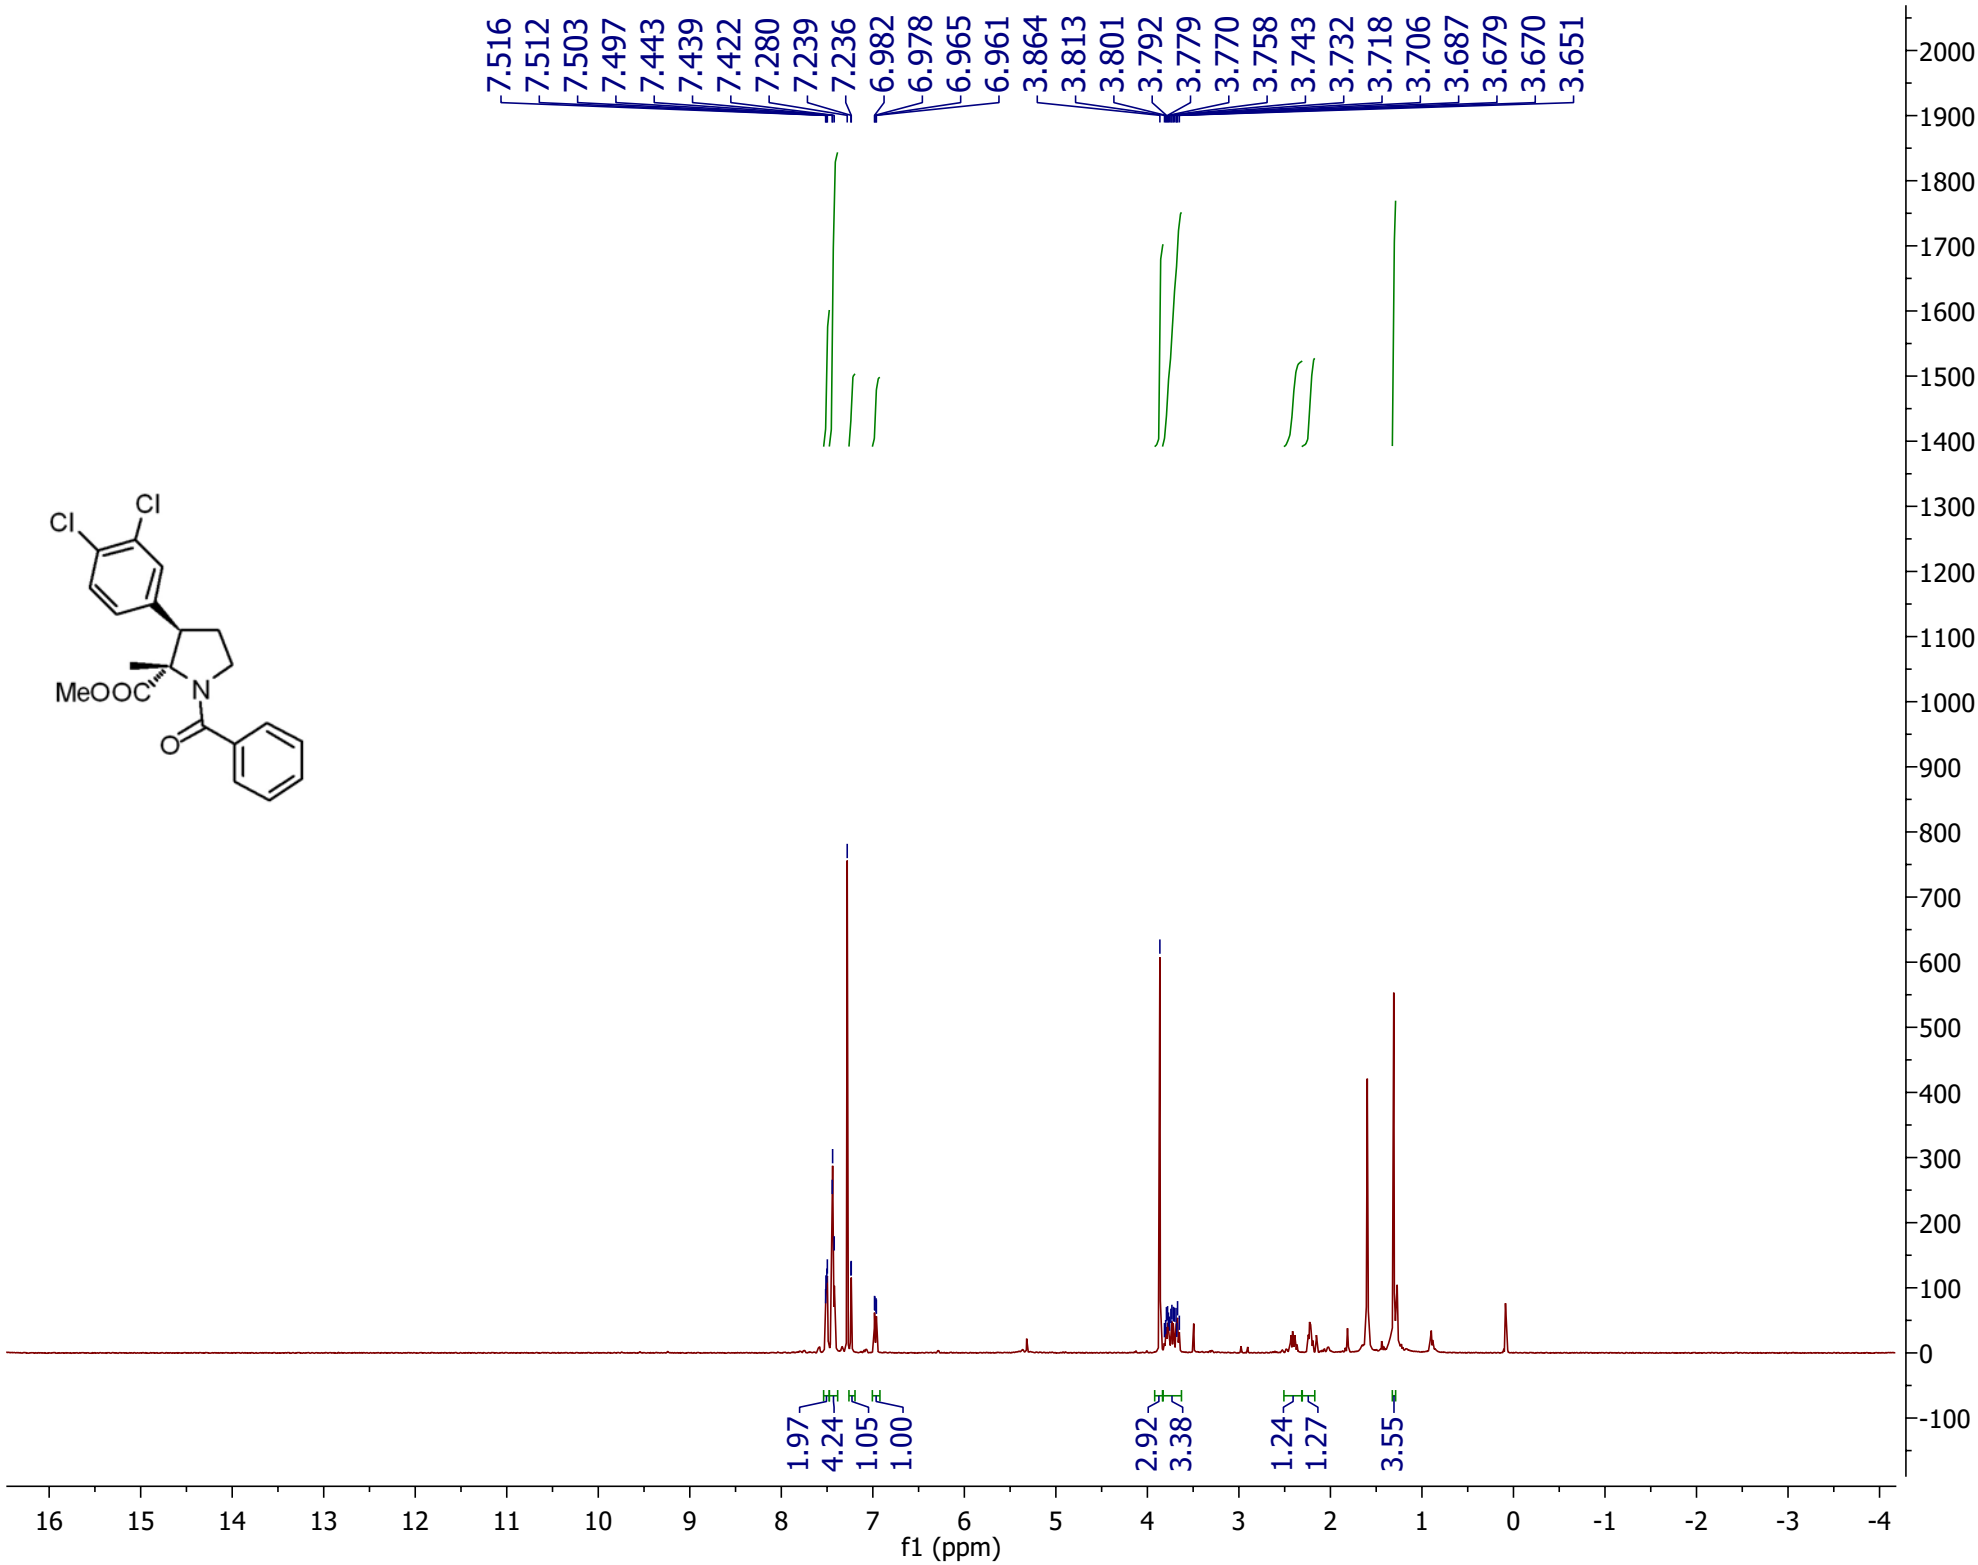

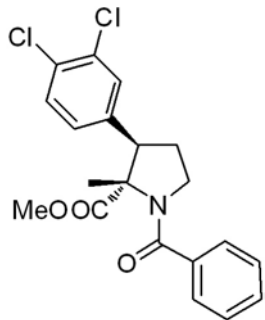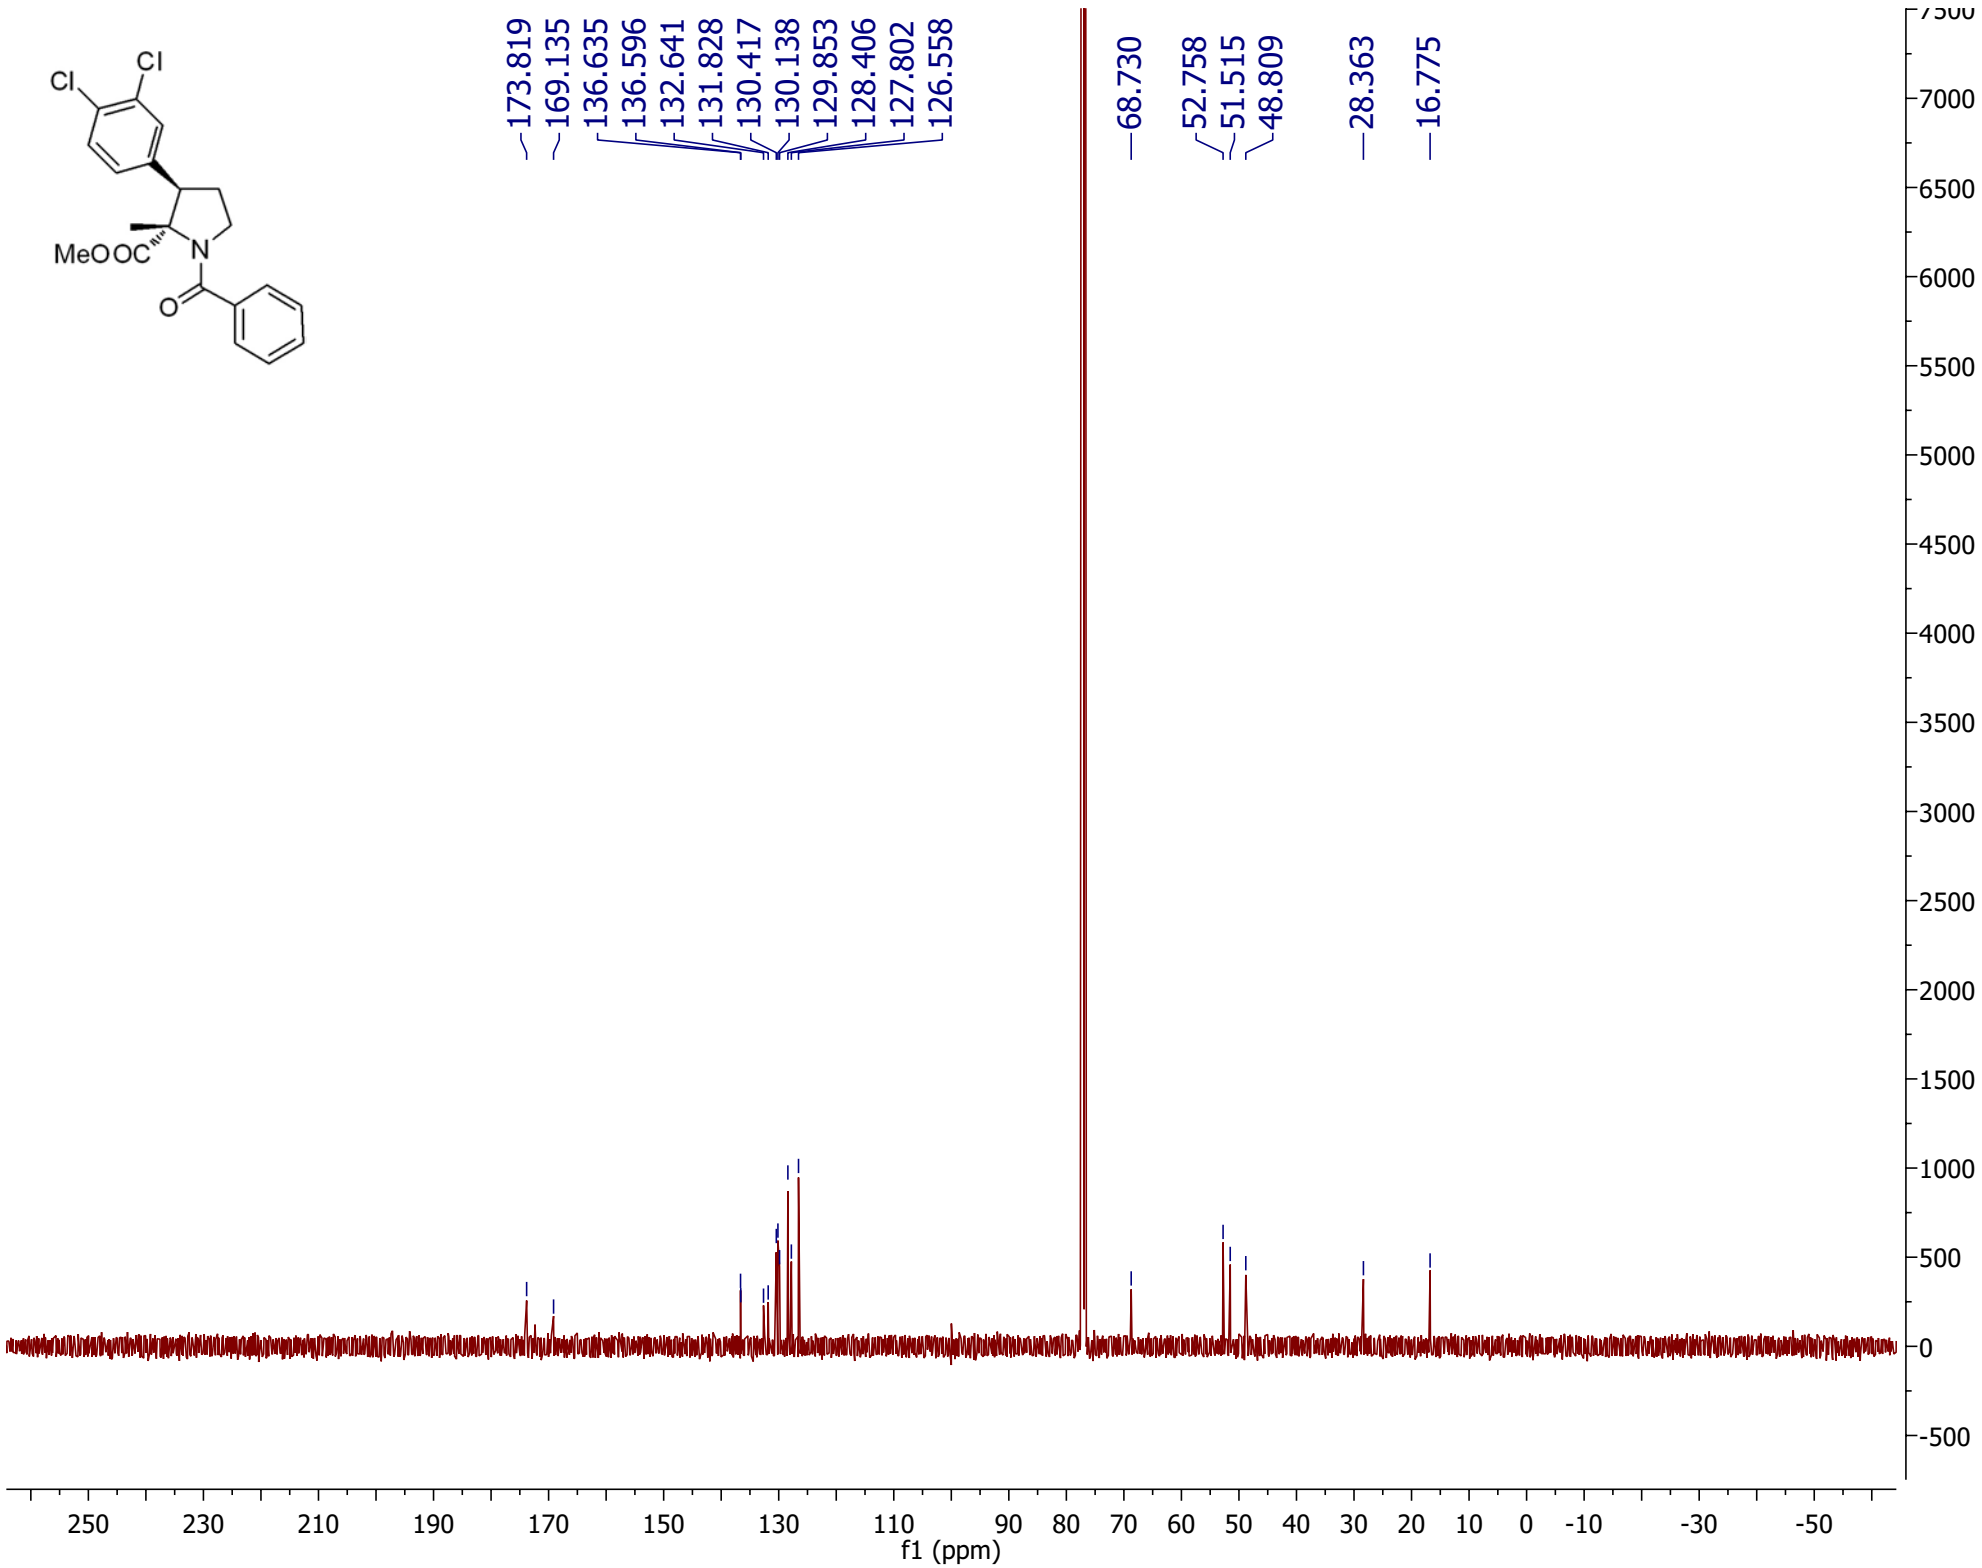

S66

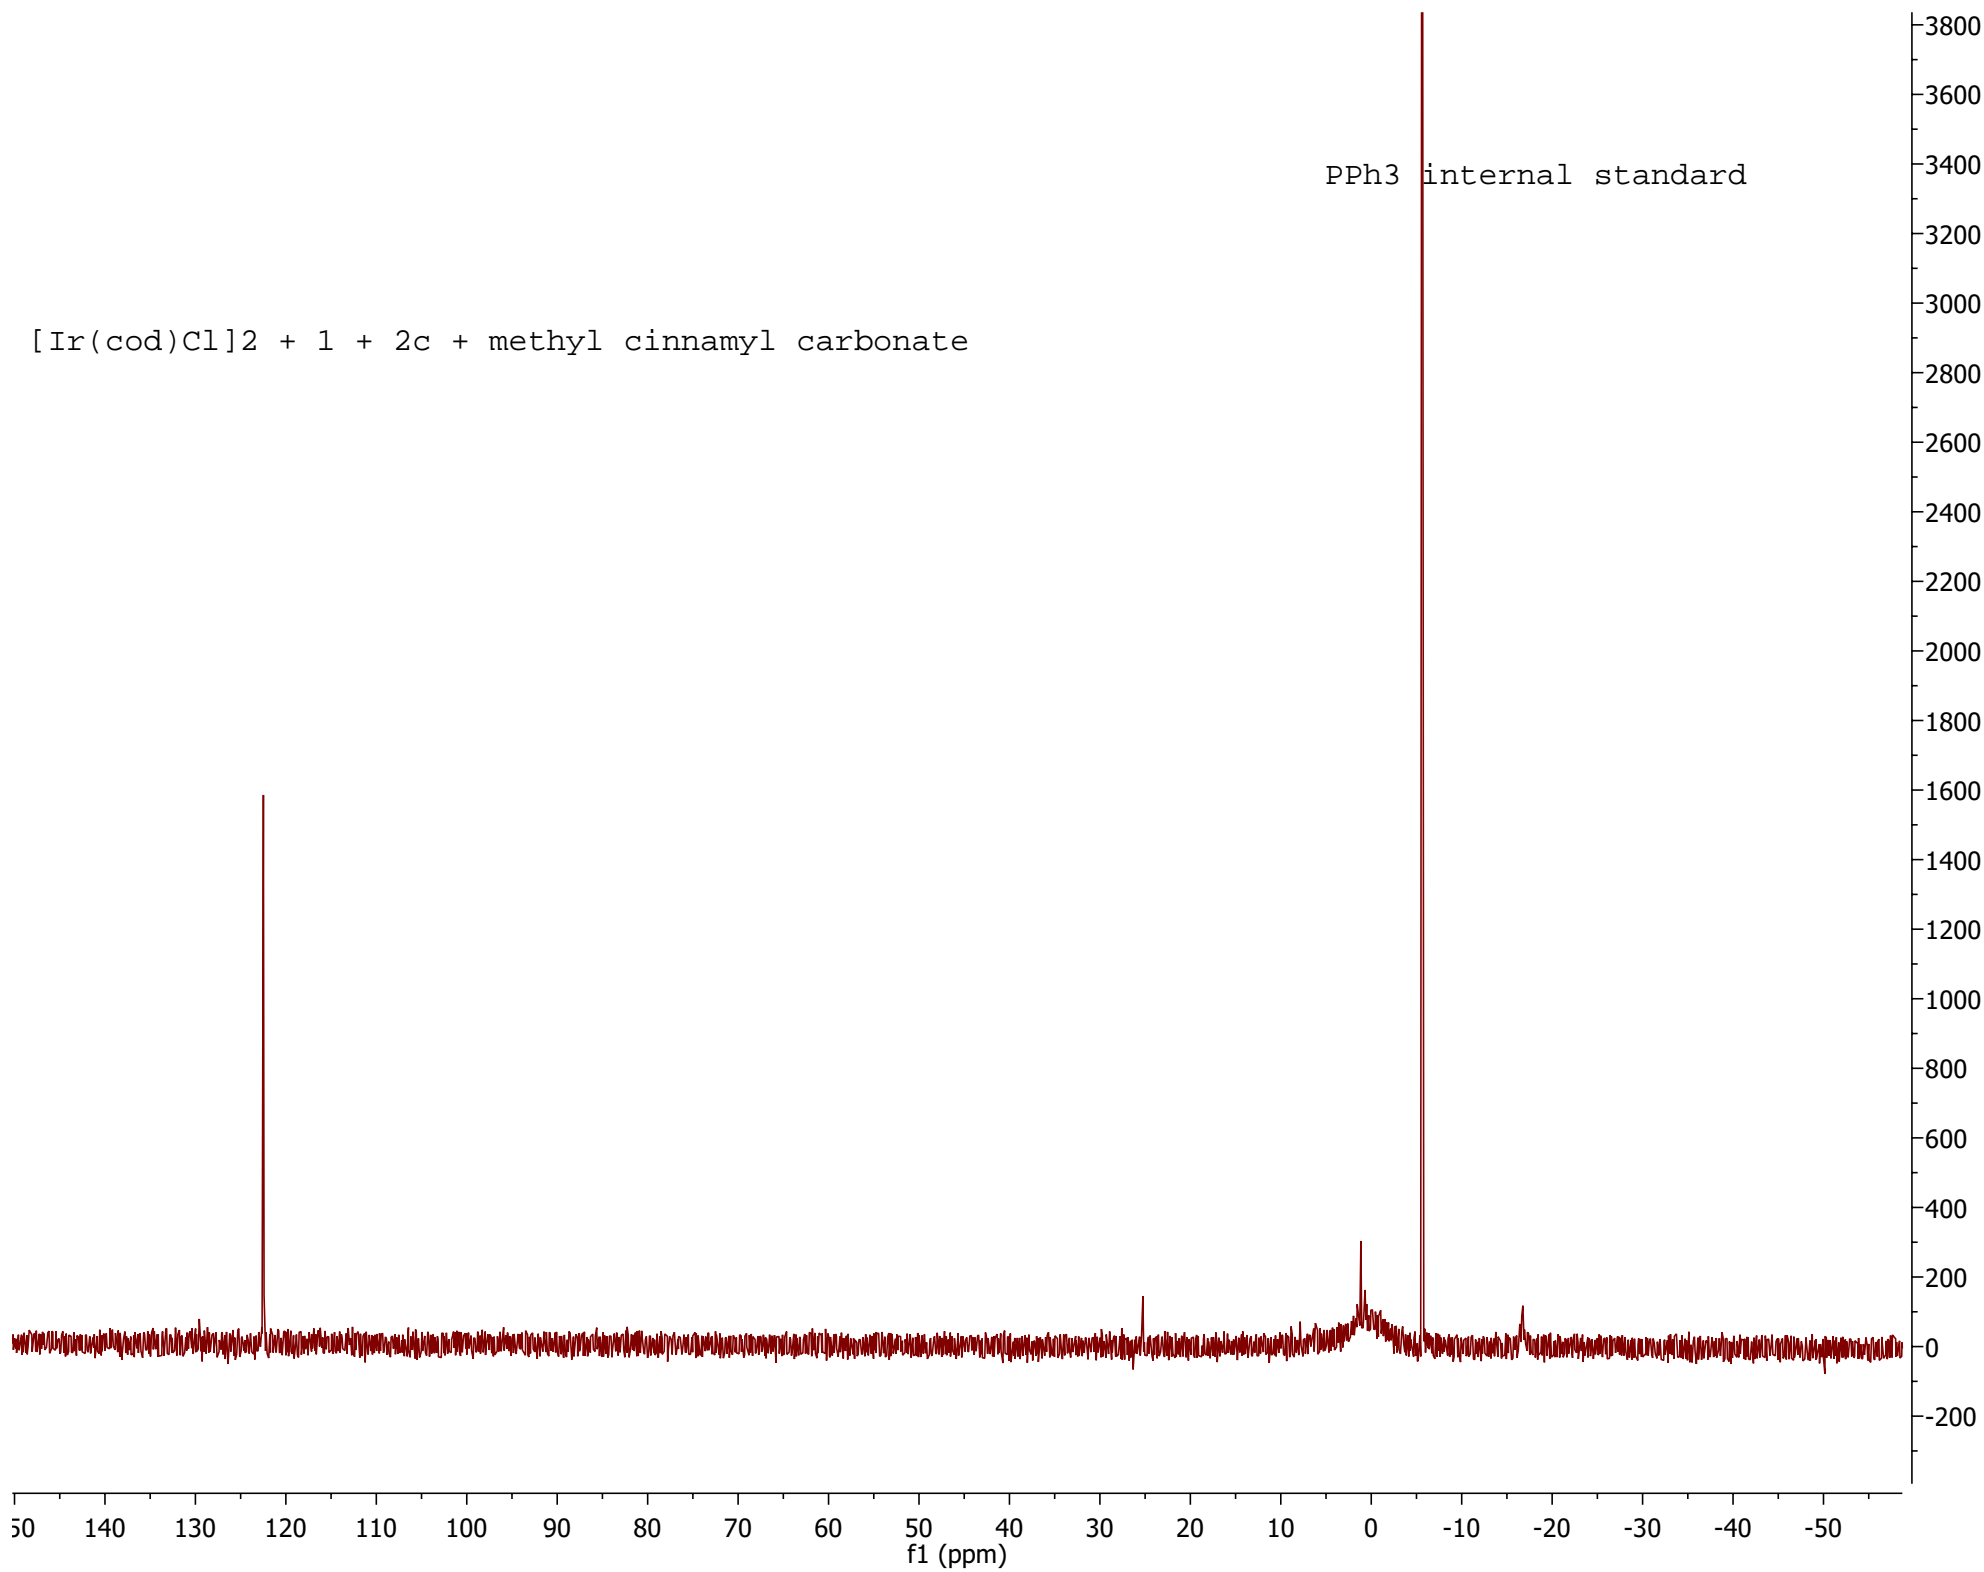

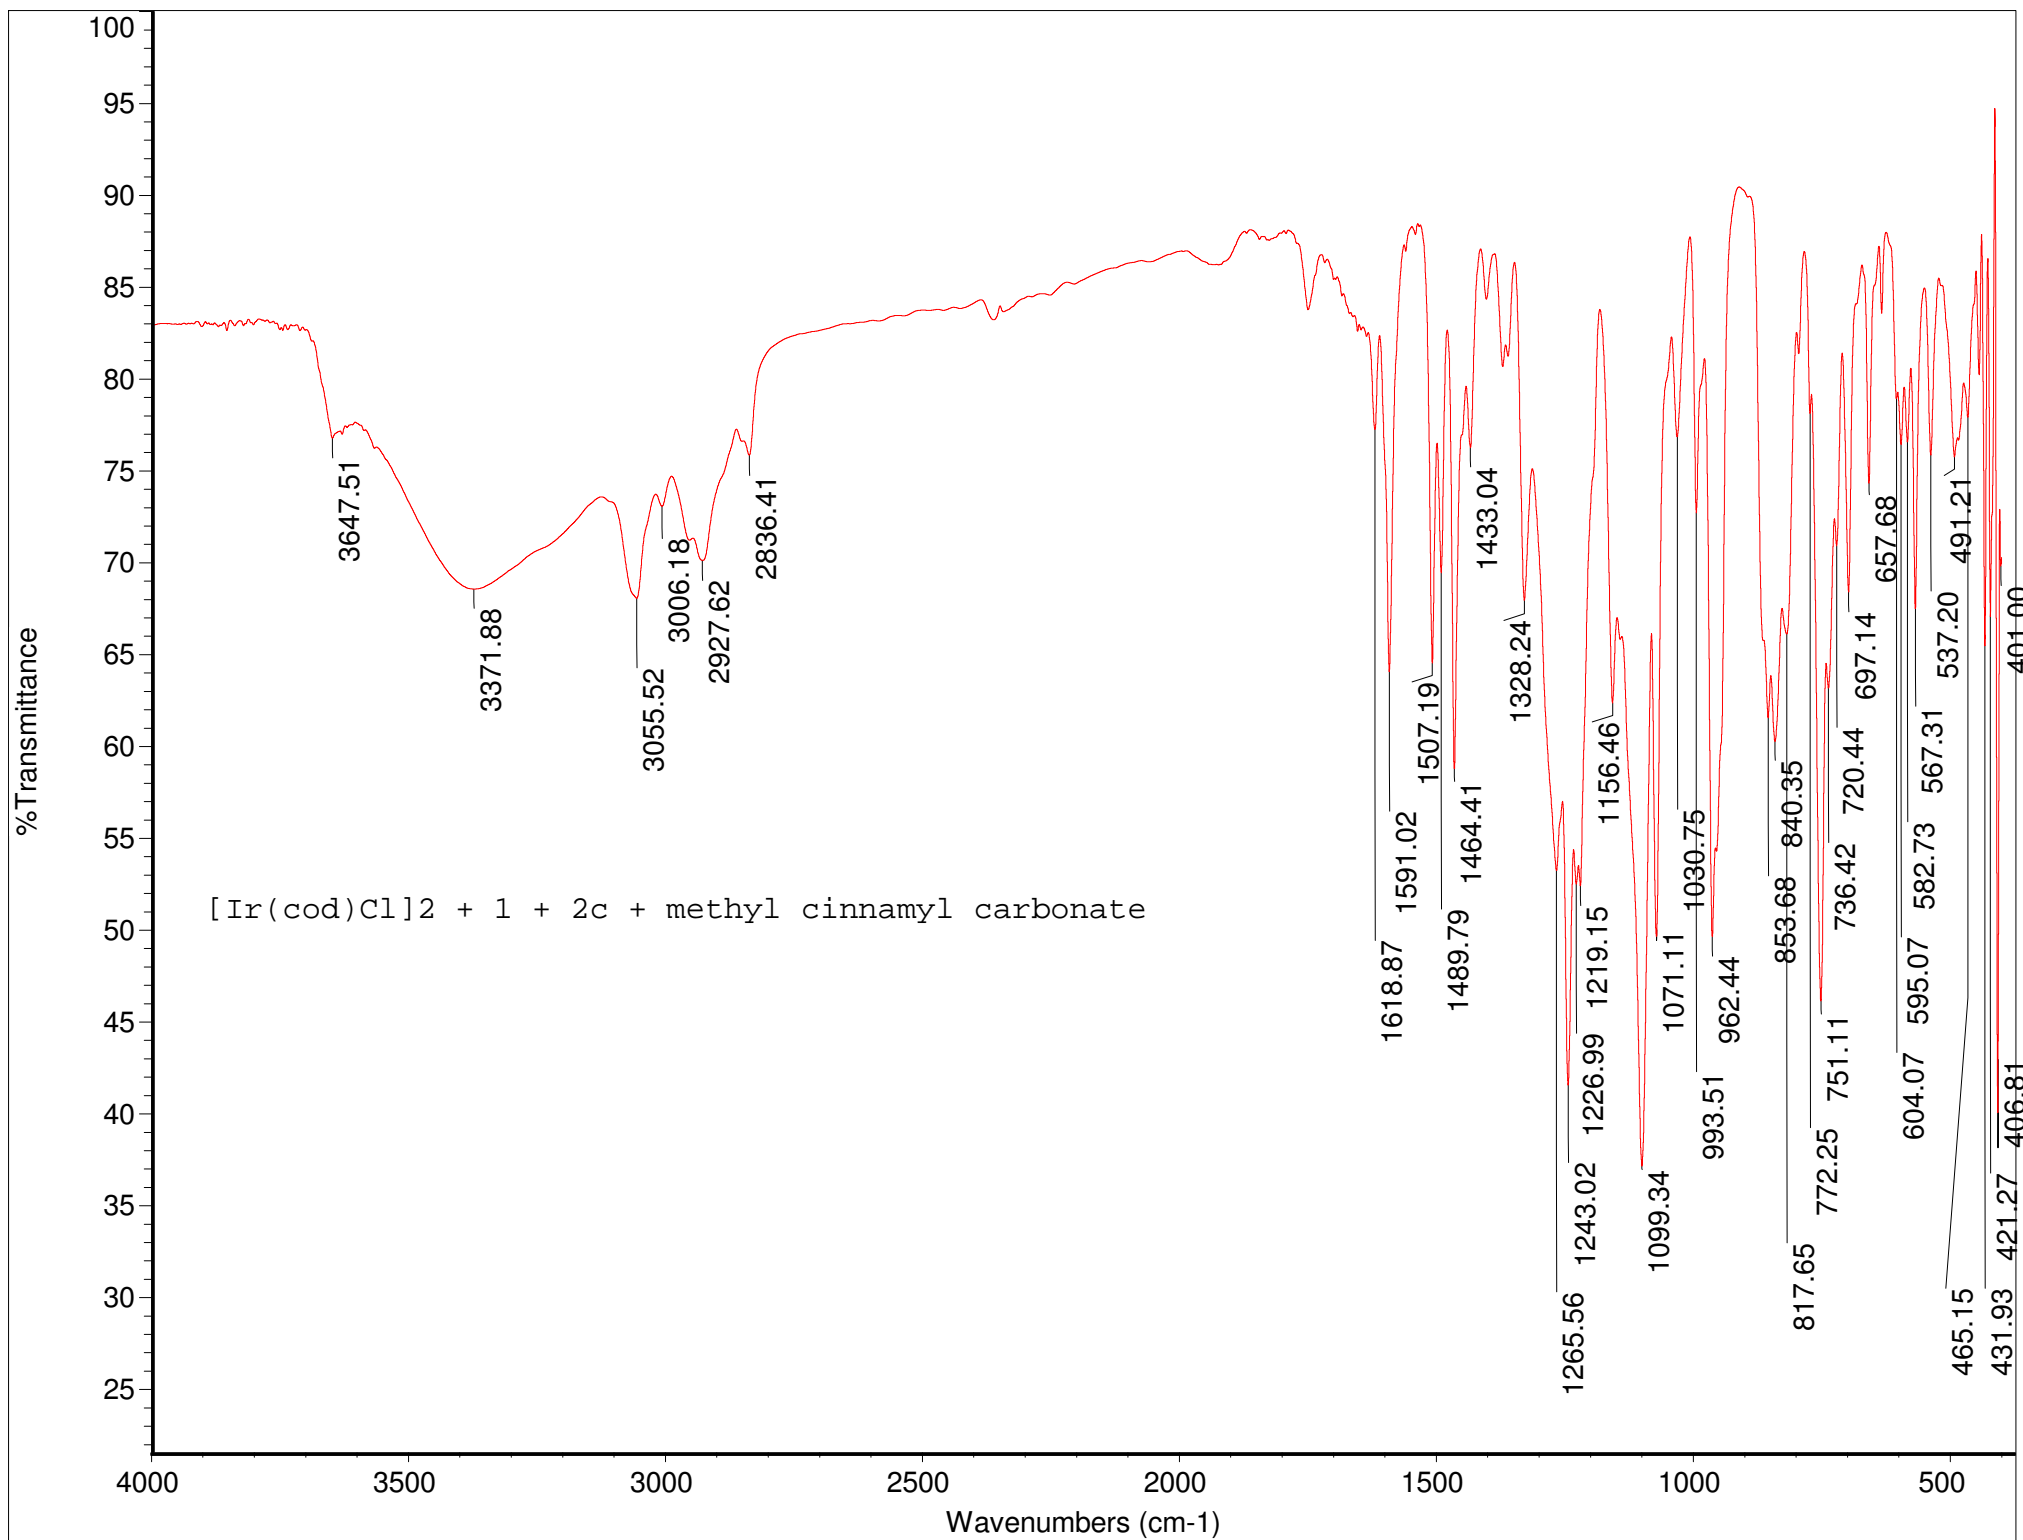

Supplement: NIHMS440614-supplement-1_si_001.pdf [file NIHMS440614-supplement-1_si_001.pdf]
